# Supplementary material for: Discovery of a Small-Molecule Modulator of the Autophagy-Lysosome Pathway That Targets Lamin A/C and LAMP1, Induces Autophagic Flux, and Affects Lysosome Positioning in Neurons
Source: PubMed Central journal article supplement — ACS Chem Neurosci. 2023 Dec 9;14(24):4363–82. doi: 10.1021/acschemneuro.3c00573 (PMC10739612; doi:10.1021/acschemneuro.3c00573), 2023-12-09

## Supporting Information

### Discovery of a Small-molecule Modulator of the Autophagy-Lysosome Pathway that Targets Lamin A/C and LAMP1, Induces Autophagic Flux, and Affects Lysosome Positioning in Neurons

Ryan S. Hippman,<sup>a‡</sup> Amanda M. Snead,<sup>b‡</sup> Zoe A. Petros,<sup>a‡</sup> Melissa A. Korkmaz-Vaisys,<sup>a</sup> Sruchi Patel,<sup>b</sup> Daniel Sotelo,<sup>a</sup> Andrew Dobria,<sup>a</sup> Maryna Salkovski,<sup>a</sup> Thu T. A. Nguyen,<sup>a</sup> Ricardo Linares,<sup>b</sup> Stephanie M. Cologna,<sup>a</sup> Swetha Gowrishankar,<sup>b\*</sup> Leslie N. Aldrich<sup>a\*</sup>

<sup>‡</sup> Denotes Equal Contributions

\* Corresponding Authors: Leslie N. Aldrich (aldrich@uic.edu) and Swetha Gowrishankar (swethag@uic.edu)

<sup>a</sup> University of Illinois Chicago, Department of Chemistry, College of Liberal Arts and Sciences, 845 W. Taylor St. Chicago, IL 60607

<sup>b</sup> University of Illinois Chicago, Department of Anatomy and Cell Biology, College of Medicine, 808 S. Wood St. Chicago, IL 60612

#### **Table of Contents**

|      |                         |
|------|-------------------------|
| S2.  | Table S1                |
| S3.  | Table S2                |
| S4.  | Table S3                |
| S5.  | Figure S1               |
| S6.  | Figure S2               |
| S7.  | Figure S3               |
| S8.  | Figure S4               |
| S9.  | Figure S5               |
| S10. | Uncropped Western Blots |
| S17. | NMR Spectra             |

|                   |                                          |                               |                                        |                   |                                          |                               |                                        |                   |                                          |                               |                                        |                   |                                          |                               |                                        |
|-------------------|------------------------------------------|-------------------------------|----------------------------------------|-------------------|------------------------------------------|-------------------------------|----------------------------------------|-------------------|------------------------------------------|-------------------------------|----------------------------------------|-------------------|------------------------------------------|-------------------------------|----------------------------------------|
| <b>001-3 Dup1</b> | Controls: Avg puncta/cell Std dev Z' %CV | DMSO 2.515 0.331 0.568 13.160 | CQ <sub>20</sub> μM 10.764 0.856 7.953 | <b>001-3 Dup2</b> | Controls: Avg puncta/cell Std dev Z' %CV | DMSO 1.974 0.209 0.562 10.613 | CQ <sub>20</sub> μM 9.002 0.816 9.063  | <b>017-3 Dup1</b> | Controls: Avg puncta/cell Std dev Z' %CV | DMSO 2.396 0.299 0.685 12.470 | CQ <sub>20</sub> μM 9.441 0.440 4.658  | <b>017-3 Dup2</b> | Controls: Avg puncta/cell Std dev Z' %CV | DMSO 1.989 0.246 0.542 12.352 | CQ <sub>20</sub> μM 8.305 0.719 8.655  |
| <b>002-3 Dup1</b> | Controls: Avg puncta/cell Std dev Z' %CV | DMSO 2.586 0.246 0.694 9.521  | CQ <sub>20</sub> μM 11.123 0.625 5.616 | <b>002-3 Dup2</b> | Controls: Avg puncta/cell Std dev Z' %CV | DMSO 2.566 0.313 0.736 12.211 | CQ <sub>20</sub> μM 11.064 0.435 3.932 | <b>018-3 Dup1</b> | Controls: Avg puncta/cell Std dev Z' %CV | DMSO 2.850 0.357 0.604 12.515 | CQ <sub>20</sub> μM 10.415 0.641 6.157 | <b>018-3 Dup2</b> | Controls: Avg puncta/cell Std dev Z' %CV | DMSO 2.272 0.272 0.611 9.430  | CQ <sub>20</sub> μM 10.715 0.743 6.933 |
| <b>003-3 Dup1</b> | Controls: Avg puncta/cell Std dev Z' %CV | DMSO 2.107 0.241 0.509 11.430 | CQ <sub>20</sub> μM 8.958 0.881 9.835  | <b>003-3 Dup2</b> | Controls: Avg puncta/cell Std dev Z' %CV | DMSO 1.993 0.220 0.461 11.061 | CQ <sub>20</sub> μM 8.723 0.988 11.328 | <b>019-3 Dup1</b> | Controls: Avg puncta/cell Std dev Z' %CV | DMSO 2.703 0.150 0.587 5.547  | CQ <sub>20</sub> μM 10.115 0.871 8.611 | <b>019-3 Dup2</b> | Controls: Avg puncta/cell Std dev Z' %CV | DMSO 2.560 0.215 0.635 8.417  | CQ <sub>20</sub> μM 9.875 0.674 6.822  |
| <b>004-3 Dup1</b> | Controls: Avg puncta/cell Std dev Z' %CV | DMSO 2.307 0.250 0.671 10.824 | CQ <sub>20</sub> μM 10.831 0.684 6.314 | <b>004-3 Dup2</b> | Controls: Avg puncta/cell Std dev Z' %CV | DMSO 2.542 0.202 0.711 7.932  | CQ <sub>20</sub> μM 10.823 0.596 5.503 | <b>020-3 Dup1</b> | Controls: Avg puncta/cell Std dev Z' %CV | DMSO 2.343 0.261 0.648 11.127 | CQ <sub>20</sub> μM 9.735 0.606 6.225  | <b>020-3 Dup2</b> | Controls: Avg puncta/cell Std dev Z' %CV | DMSO 1.897 0.925 0.335 48.782 | CQ <sub>20</sub> μM 10.292 0.935 9.084 |
| <b>005-3 Dup1</b> | Controls: Avg puncta/cell Std dev Z' %CV | DMSO 2.728 0.257 0.670 9.426  | CQ <sub>20</sub> μM 10.627 0.610 5.745 | <b>005-3 Dup2</b> | Controls: Avg puncta/cell Std dev Z' %CV | DMSO 2.685 0.282 0.629 10.498 | CQ <sub>20</sub> μM 9.899 0.610 6.157  | <b>021-3 Dup1</b> | Controls: Avg puncta/cell Std dev Z' %CV | DMSO 2.640 0.305 0.711 11.534 | CQ <sub>20</sub> μM 10.607 0.462 4.355 | <b>021-3 Dup2</b> | Controls: Avg puncta/cell Std dev Z' %CV | DMSO 2.764 0.237 0.692 8.618  | CQ <sub>20</sub> μM 10.826 0.592 5.467 |
| <b>006-3 Dup1</b> | Controls: Avg puncta/cell Std dev Z' %CV | DMSO 2.856 0.230 0.595 8.070  | CQ <sub>20</sub> μM 10.496 0.801 7.633 | <b>006-3 Dup2</b> | Controls: Avg puncta/cell Std dev Z' %CV | DMSO 2.863 0.318 0.595 11.121 | CQ <sub>20</sub> μM 10.768 0.749 6.960 | <b>022-3 Dup1</b> | Controls: Avg puncta/cell Std dev Z' %CV | DMSO 2.589 0.323 0.666 12.494 | CQ <sub>20</sub> μM 10.083 0.511 5.073 | <b>022-3 Dup2</b> | Controls: Avg puncta/cell Std dev Z' %CV | DMSO 2.478 0.346 0.654 13.975 | CQ <sub>20</sub> μM 10.552 0.586 5.555 |
| <b>007-3 Dup1</b> | Controls: Avg puncta/cell Std dev Z' %CV | DMSO 2.221 0.387 0.584 17.416 | CQ <sub>20</sub> μM 9.239 0.586 6.338  | <b>007-3 Dup2</b> | Controls: Avg puncta/cell Std dev Z' %CV | DMSO 2.584 0.353 0.600 13.673 | CQ <sub>20</sub> μM 10.189 0.661 6.484 | <b>023-3 Dup1</b> | Controls: Avg puncta/cell Std dev Z' %CV | DMSO 2.683 0.189 0.736 7.062  | CQ <sub>20</sub> μM 10.673 0.514 4.818 | <b>023-3 Dup2</b> | Controls: Avg puncta/cell Std dev Z' %CV | DMSO 2.697 0.352 0.682 13.057 | CQ <sub>20</sub> μM 10.529 0.477 4.530 |
| <b>008-3 Dup1</b> | Controls: Avg puncta/cell Std dev Z' %CV | DMSO 2.371 0.373 0.632 15.743 | CQ <sub>20</sub> μM 9.886 0.548 5.542  | <b>008-3 Dup2</b> | Controls: Avg puncta/cell Std dev Z' %CV | DMSO 2.422 0.282 0.678 11.628 | CQ <sub>20</sub> μM 9.753 0.505 5.180  | <b>024-3 Dup1</b> | Controls: Avg puncta/cell Std dev Z' %CV | DMSO 2.086 0.335 0.436 16.043 | CQ <sub>20</sub> μM 9.668 1.091 11.286 | <b>024-3 Dup2</b> | Controls: Avg puncta/cell Std dev Z' %CV | DMSO 2.469 0.256 0.635 10.375 | CQ <sub>20</sub> μM 10.292 0.696 6.767 |
| <b>009-3 Dup1</b> | Controls: Avg puncta/cell Std dev Z' %CV | DMSO 2.273 0.265 0.536 11.652 | CQ <sub>20</sub> μM 9.468 0.849 8.962  | <b>009-3 Dup2</b> | Controls: Avg puncta/cell Std dev Z' %CV | DMSO 2.394 0.333 0.592 13.892 | CQ <sub>20</sub> μM 9.962 0.697 6.993  | <b>025-3 Dup1</b> | Controls: Avg puncta/cell Std dev Z' %CV | DMSO 2.214 0.310 0.480 13.979 | CQ <sub>20</sub> μM 9.558 0.940 10.089 | <b>025-3 Dup2</b> | Controls: Avg puncta/cell Std dev Z' %CV | DMSO 2.142 0.227 0.581 10.582 | CQ <sub>20</sub> μM 9.399 0.786 8.364  |
| <b>010-3 Dup1</b> | Controls: Avg puncta/cell Std dev Z' %CV | DMSO 2.380 0.263 0.624 11.046 | CQ <sub>20</sub> μM 9.800 0.668 6.812  | <b>010-3 Dup2</b> | Controls: Avg puncta/cell Std dev Z' %CV | DMSO 2.464 0.323 0.648 13.106 | CQ <sub>20</sub> μM 9.879 0.548 5.543  | <b>026-3 Dup1</b> | Controls: Avg puncta/cell Std dev Z' %CV | DMSO 1.899 0.237 0.499 12.484 | CQ <sub>20</sub> μM 8.929 0.936 10.486 | <b>026-3 Dup2</b> | Controls: Avg puncta/cell Std dev Z' %CV | DMSO 1.919 0.478 0.490 24.900 | CQ <sub>20</sub> μM 9.208 0.760 8.257  |
| <b>011-3 Dup1</b> | Controls: Avg puncta/cell Std dev Z' %CV | DMSO 2.051 0.202 0.690 9.865  | CQ <sub>20</sub> μM 9.967 0.616 6.182  | <b>011-3 Dup2</b> | Controls: Avg puncta/cell Std dev Z' %CV | DMSO 2.286 0.201 0.655 8.775  | CQ <sub>20</sub> μM 10.224 0.712 6.968 | <b>027-3 Dup1</b> | Controls: Avg puncta/cell Std dev Z' %CV | DMSO 2.639 0.176 0.669 6.680  | CQ <sub>20</sub> μM 10.982 0.746 6.789 | <b>027-3 Dup2</b> | Controls: Avg puncta/cell Std dev Z' %CV | DMSO 1.917 0.236 0.383 12.299 | CQ <sub>20</sub> μM 8.621 1.143 13.259 |
| <b>012-3 Dup1</b> | Controls: Avg puncta/cell Std dev Z' %CV | DMSO 2.397 0.228 0.657 9.498  | CQ <sub>20</sub> μM 10.124 0.656 6.477 | <b>012-3 Dup2</b> | Controls: Avg puncta/cell Std dev Z' %CV | DMSO 2.201 0.331 0.734 15.031 | CQ <sub>20</sub> μM 10.331 0.391 3.781 | <b>028-3 Dup1</b> | Controls: Avg puncta/cell Std dev Z' %CV | DMSO 2.729 0.227 0.721 8.319  | CQ <sub>20</sub> μM 10.226 0.469 4.586 | <b>028-3 Dup2</b> | Controls: Avg puncta/cell Std dev Z' %CV | DMSO 2.762 0.198 0.657 7.171  | CQ <sub>20</sub> μM 9.974 0.627 6.287  |
| <b>013-3 Dup1</b> | Controls: Avg puncta/cell Std dev Z' %CV | DMSO 1.737 0.184 0.598 10.600 | CQ <sub>20</sub> μM 8.383 0.707 8.429  | <b>013-3 Dup2</b> | Controls: Avg puncta/cell Std dev Z' %CV | DMSO 2.232 0.235 0.681 10.530 | CQ <sub>20</sub> μM 9.630 0.552 5.730  | <b>029-3 Dup1</b> | Controls: Avg puncta/cell Std dev Z' %CV | DMSO 2.098 0.213 0.622 10.161 | CQ <sub>20</sub> μM 10.463 0.839 8.023 | <b>029-3 Dup2</b> | Controls: Avg puncta/cell Std dev Z' %CV | DMSO 2.244 0.256 0.535 11.385 | CQ <sub>20</sub> μM 10.552 1.032 9.770 |
| <b>014-3 Dup1</b> | Controls: Avg puncta/cell Std dev Z' %CV | DMSO 2.370 0.221 0.725 9.337  | CQ <sub>20</sub> μM 10.221 0.498 4.871 | <b>014-3 Dup2</b> | Controls: Avg puncta/cell Std dev Z' %CV | DMSO 2.310 0.592 0.464 25.635 | CQ <sub>20</sub> μM 10.547 0.879 8.333 | <b>030-3 Dup1</b> | Controls: Avg puncta/cell Std dev Z' %CV | DMSO 2.090 0.282 0.455 13.494 | CQ <sub>20</sub> μM 9.889 1.134 11.472 | <b>030-3 Dup2</b> | Controls: Avg puncta/cell Std dev Z' %CV | DMSO 2.153 0.256 0.560 11.891 | CQ <sub>20</sub> μM 10.334 0.944 9.133 |
| <b>015-3 Dup1</b> | Controls: Avg puncta/cell Std dev Z' %CV | DMSO 2.177 0.224 0.694 10.294 | CQ <sub>20</sub> μM 9.601 0.533 5.553  | <b>015-3 Dup2</b> | Controls: Avg puncta/cell Std dev Z' %CV | DMSO 2.571 0.404 0.605 15.720 | CQ <sub>20</sub> μM 9.780 0.545 5.573  | <b>031-3 Dup1</b> | Controls: Avg puncta/cell Std dev Z' %CV | DMSO 2.372 0.177 0.673 7.467  | CQ <sub>20</sub> μM 9.257 0.573 6.192  | <b>031-3 Dup2</b> | Controls: Avg puncta/cell Std dev Z' %CV | DMSO 2.294 0.290 0.424 12.636 | CQ <sub>20</sub> μM 8.696 0.940 10.809 |
| <b>016-3 Dup1</b> | Controls: Avg puncta/cell Std dev Z' %CV | DMSO 1.868 0.187 0.688 9.991  | CQ <sub>20</sub> μM 8.603 0.515 5.981  | <b>016-3 Dup2</b> | Controls: Avg puncta/cell Std dev Z' %CV | DMSO 2.021 0.316 0.616 15.639 | CQ <sub>20</sub> μM 8.681 0.536 6.171  | <b>032-3 Dup1</b> | Controls: Avg puncta/cell Std dev Z' %CV | DMSO 2.366 0.268 0.445 11.347 | CQ <sub>20</sub> μM 8.673 0.898 10.357 | <b>032-3 Dup2</b> | Controls: Avg puncta/cell Std dev Z' %CV | DMSO 2.512 0.262 0.678 10.437 | CQ <sub>20</sub> μM 9.503 0.488 5.140  |

**Table S1:** Reproducibility of high-content screen.  
The high-content screen was assessed using Z' and % CV of two biological replicates.

|                                                                  |                                                                  |
|------------------------------------------------------------------|------------------------------------------------------------------|
| <b>13 elements included exclusively in <i>Biotin</i>-RH1115:</b> |                                                                  |
|                                                                  | Isoform 4 of Tropomyosin alpha-1 chain (TPM1)                    |
|                                                                  | Prelamin-A/C (LMNA)                                              |
|                                                                  | Heterogeneous nuclear ribonucleoprotein K (HNRNPK)               |
|                                                                  | Nucleoside diphosphate kinase A (NME1)                           |
|                                                                  | Fructosamine-3-kinase (FN3K)                                     |
|                                                                  | Ketosamine-3-kinase (FN3KRP)                                     |
|                                                                  | Hemoglobin subunit alpha (HBA1)                                  |
|                                                                  | Ubiquitin-60S ribosomal protein L40 (UBA-52)                     |
|                                                                  | Calmodulin-like protein 5 (CALML5) <sup>1</sup>                  |
|                                                                  | RNA-binding protein Raly (RALY)                                  |
|                                                                  | Small nuclear ribonucleoprotein E (SNRPE)                        |
|                                                                  | Lysosome-associated membrane glycoprotein 1 (LAMP1)              |
|                                                                  | HLA class I histocompatibility antigen, A-24 alpha chain (HLA-A) |

|  |                                                                               |
|--|-------------------------------------------------------------------------------|
|  | Potential targets                                                             |
|  | Different isoform, lack of disease relevance, or no expression in brain cells |
|  | Eluted in presence of competitor                                              |

**Table S2:** Proteins exclusive to *Biotin*-RH1115 in the pulldown assay.

Thirteen proteins were exclusively pulled down by *Biotin*-RH1115, of which three were selected as putative targets. Putative targets were narrowed down based on several criteria: presence of various isoforms in solution, lack of disease relevance in the literature, and expression levels in the brain (CALML5) [1].

| Antibody                                | Dilution        | Experiment         | Company (Catalog No.)  |
|-----------------------------------------|-----------------|--------------------|------------------------|
| $\beta$ -Actin (i <sup>3</sup> Neurons) | 1:30,000        | Western Blot       | ABClonal (AC026)       |
| $\beta$ -Actin (HeLa)                   | 1:2000          | Western Blot       | Cell Signaling (8457L) |
| hLamp1 (i <sup>3</sup> Neurons)         | 1:3000<br>1:500 | Western Blot<br>IF | Cell Signaling (9091)  |
| Tau (i <sup>3</sup> Neurons)            | 1:400           | IF                 | Cell Signaling (4019S) |
| LC3 (i <sup>3</sup> Neurons)            | 1: 1000         | Western Blot       | Cell Signaling (4108)  |
| LC3 (HeLa)                              | 1:1000          | Western Blot       | Cell Signaling (2775S) |
| Phospho-S6 (i <sup>3</sup> Neurons)     | 1:7500          | Western Blot       | Cell Signaling (4858)  |
| p70S6K (HeLa)                           | 1:1000          | Western Blot       | Cell Signaling (9205S) |
| S6 (i <sup>3</sup> Neurons)             | 1:1000          | Western Blot       | Cell Signaling (2217)  |
| 70S6K (HeLa)                            | 1:1000          | Western Blot       | Cell Signaling (2708S) |
| LAMP1 (HeLa)                            | 1:1000          | Western Blot       | Cell Signaling (3243S) |
| Lamin A/C (HeLa)                        | 1:1000          | Western Blot       | Cell Signaling (2032S) |
| UBA52 (HeLa)                            | 1:1000          | Western Blot       | ABCam (ab109227)       |

**Table S3:** Antibodies

Antibodies and specific experiments, dilutions, and companies are listed.

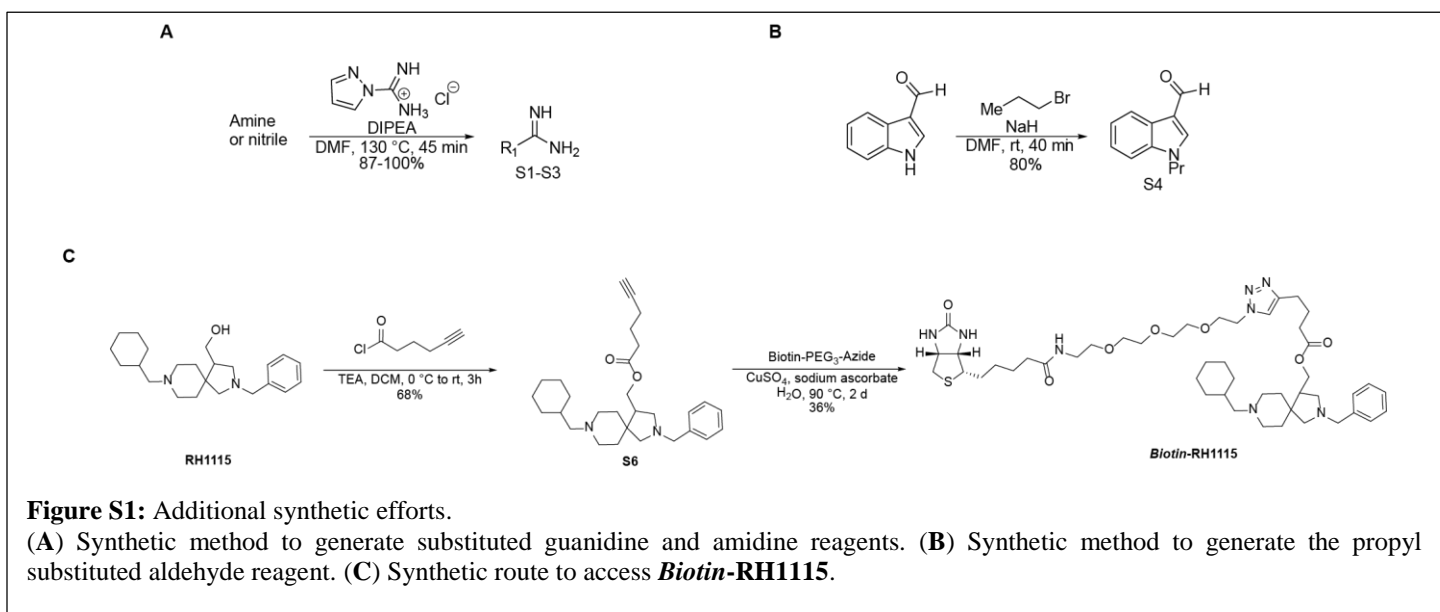

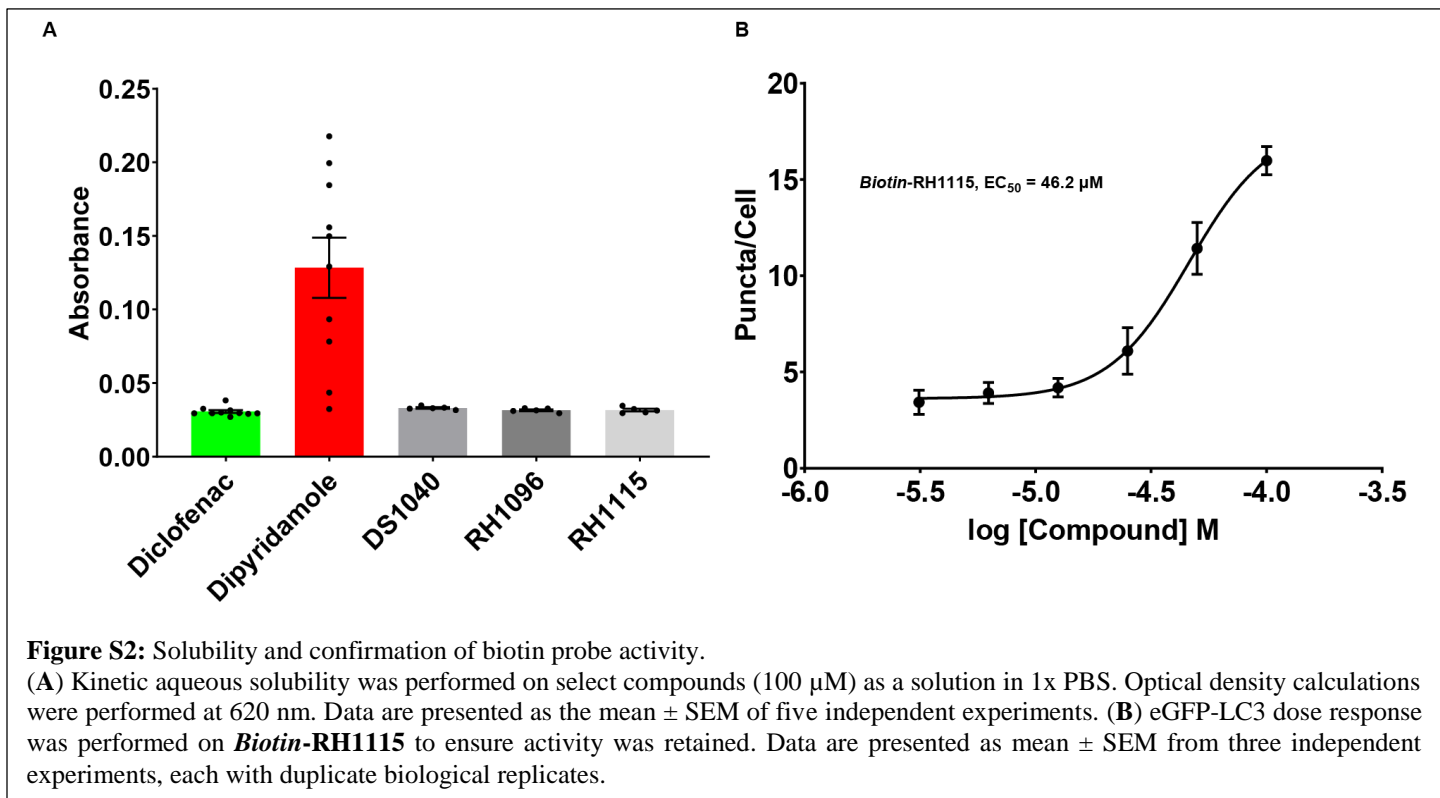

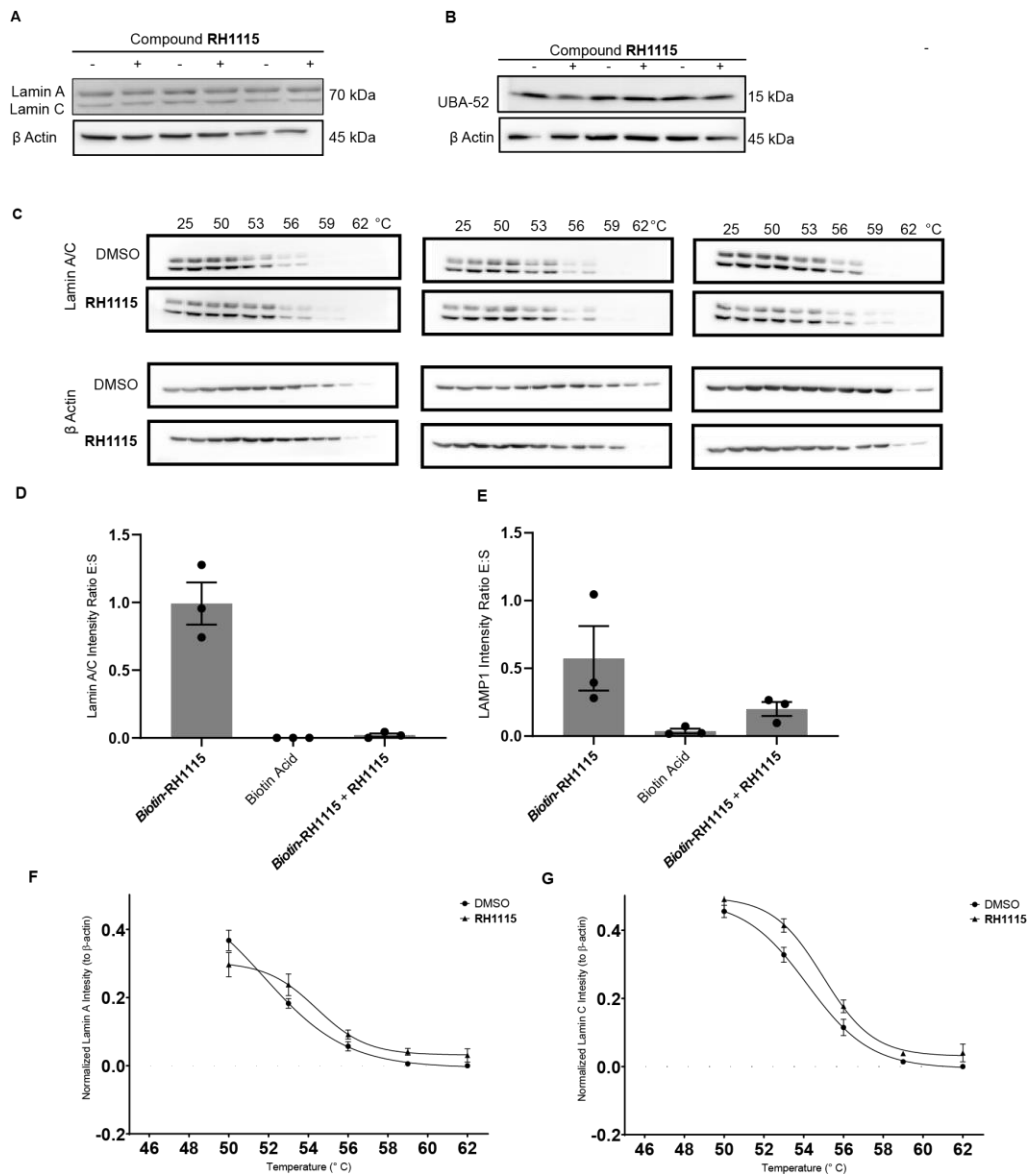

**Figure S3:** Expression levels of putative targets and validation.

Expression levels of Lamin A/C (**A**) and UBA-52 (**B**) were quantified using immunoblotting. Data are presented from three biological replicates. (**C**) Three independent Cellular Thermal Shift Assays were performed with A549 cells treated with **RH1115** (100  $\mu$ M) or DMSO for 24 h and heated at each temperature in 3 minutes. Data are presented from two biological replicates at each temperature. (**D**) Ratio of the quantification of Lamin A/C protein levels in the eluent over the supernatant for the pulldown assay. Lysates were treated with **Biotin-RH1115** (50  $\mu$ M), biotin acid (50  $\mu$ M), and **Biotin-RH1115** (50  $\mu$ M) in addition to **RH1115** in excess (100  $\mu$ M). Data are presented as the mean  $\pm$  SEM of three independent experiments. (**E**) Ratio of the quantification of LAMP1 protein levels in the eluent over the supernatant for the pulldown assay. Lysates were treated with **Biotin-RH1115** (50  $\mu$ M), biotin acid (50  $\mu$ M), and **Biotin-RH1115** (50  $\mu$ M) in addition to **RH1115** in excess (100  $\mu$ M). Data are presented as the mean  $\pm$  SEM of three independent experiments. (**F**) Quantification of three independent cellular thermal shift assays in duplicate for Lamin A ( $\Delta T_m = 2.64$   $^{\circ}$ C). Data are presented as mean  $\pm$  SEM of three independent experiments in duplicate. (**G**) Quantification of three independent cellular thermal shift assays in duplicate for Lamin C ( $\Delta T_m = 0.8$   $^{\circ}$ C). Data are presented as mean  $\pm$  SEM of three independent experiments in duplicate.

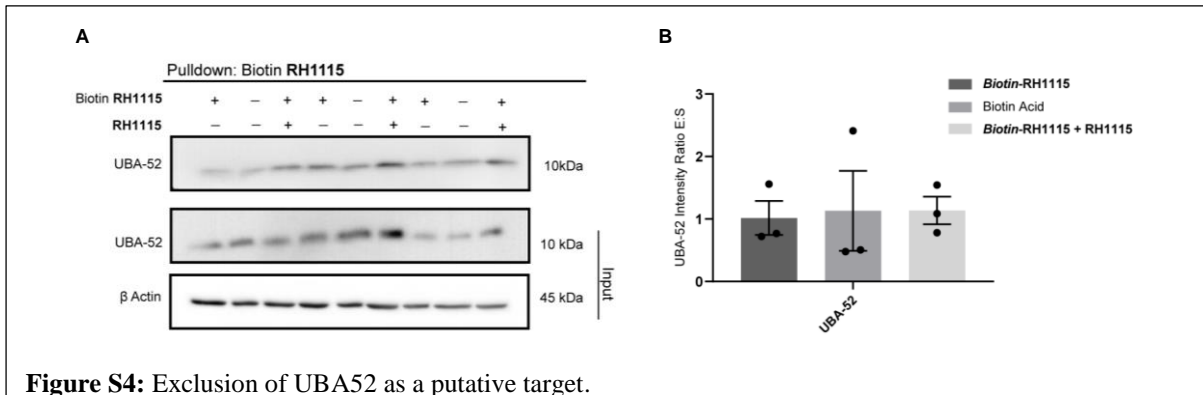

**Figure S4:** Exclusion of UBA52 as a putative target.

(A) Immunoblot analysis of UBA52 capture by streptavidin pulldown protocol in the presence of **Biotin-RH1115** (50  $\mu$ M) (+/-), biotin acid (-/-), **Biotin-RH1115** (50  $\mu$ M) with excess **RH1115** (100  $\mu$ M) following lysate addition to the beads (+/+).  $\beta$ -actin was used as a loading control. Data are presented from three independent experiments. (B) Ratio of the quantification of UBA52 protein levels in the eluent over the supernatant for the pulldown assay shown in (A). Data are presented as the mean  $\pm$  SEM of three independent experiments.



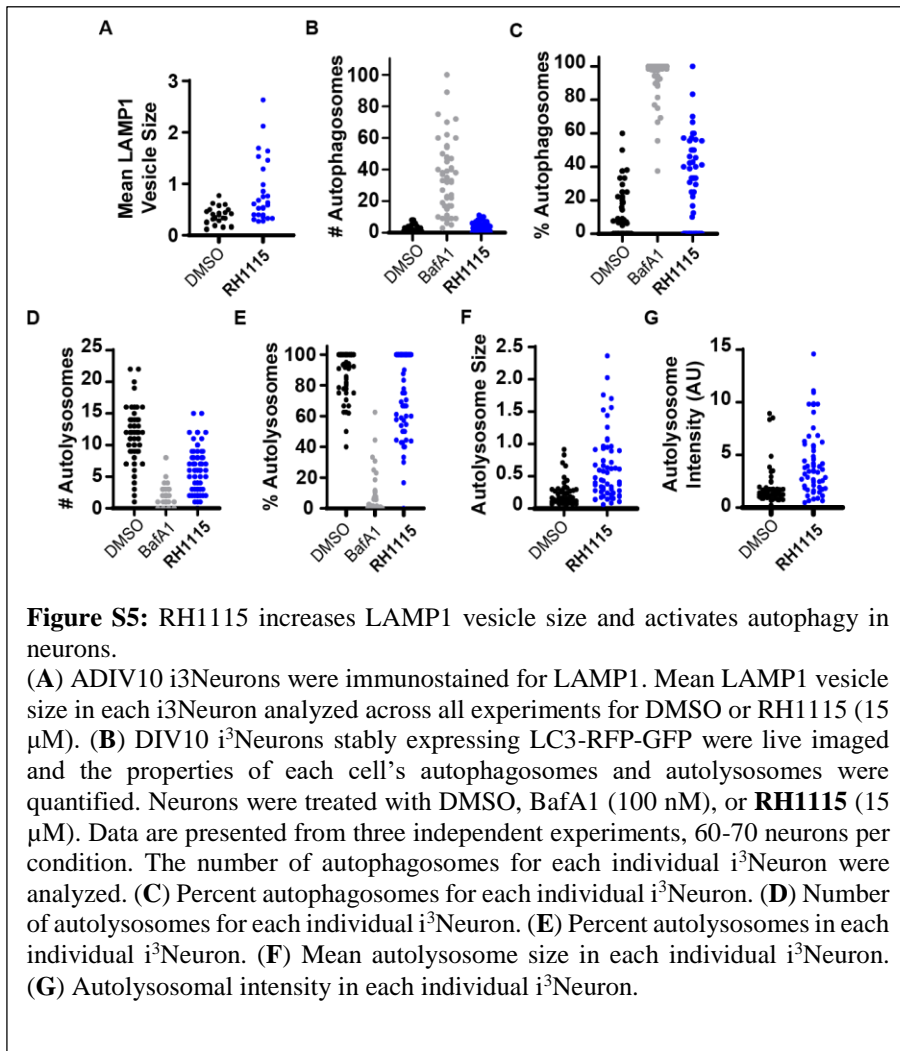

# Uncropped Western Blots

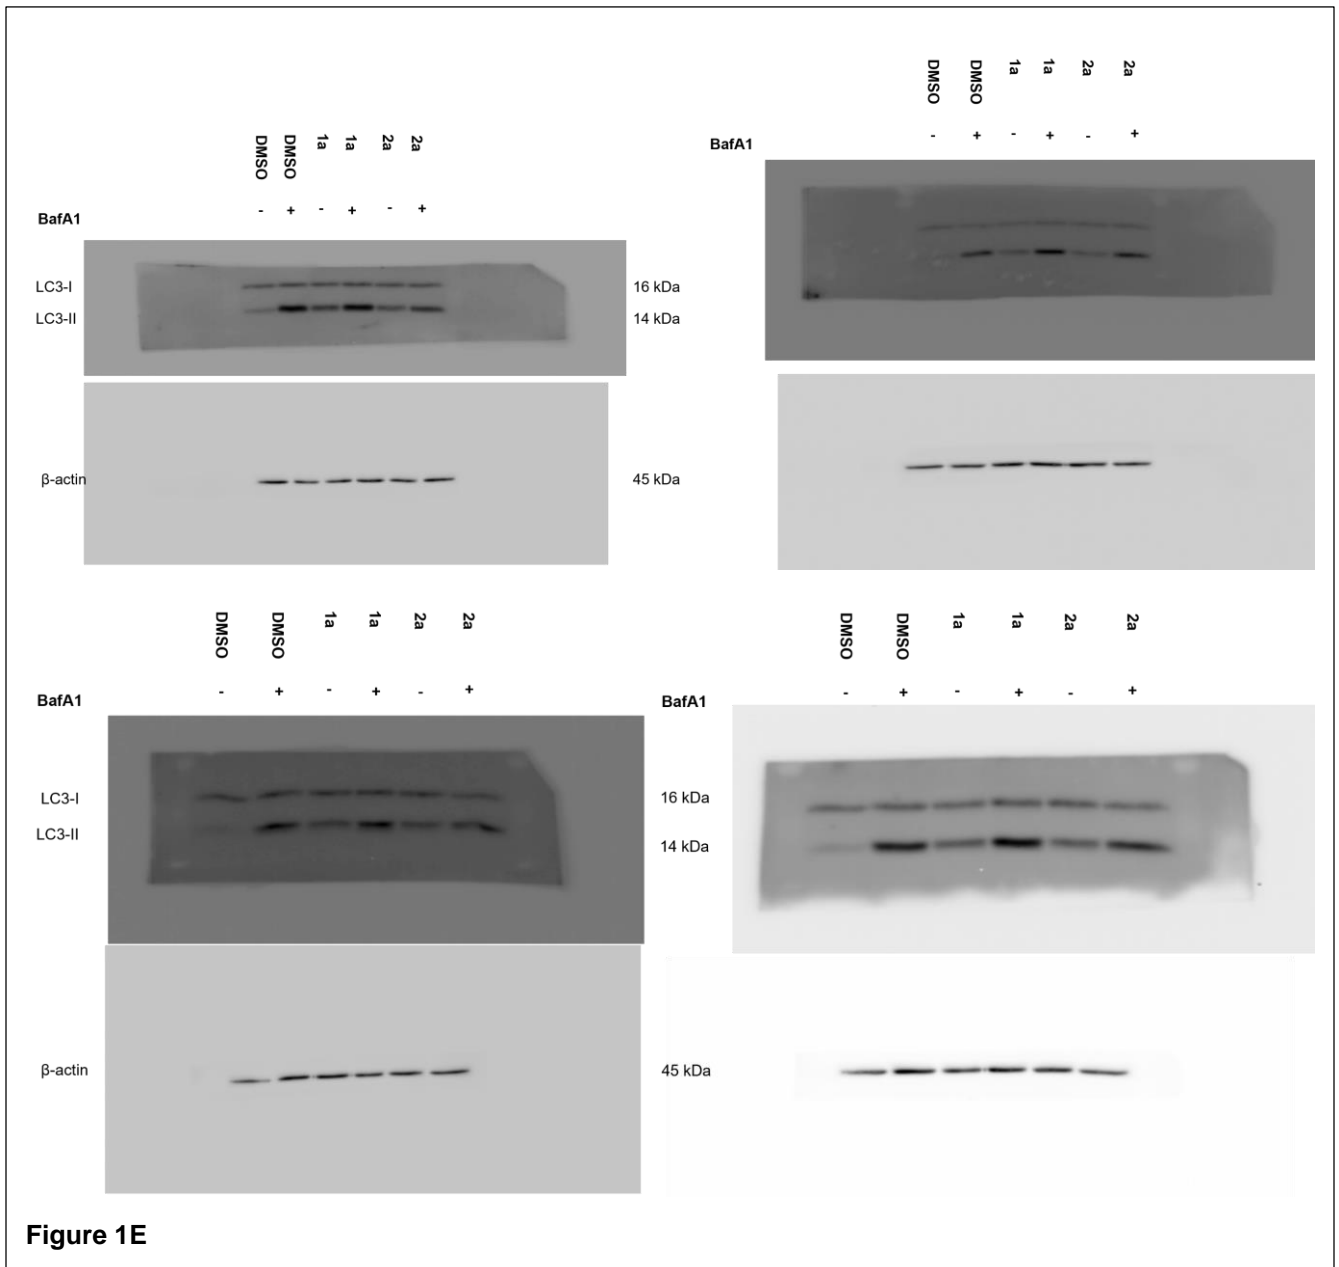

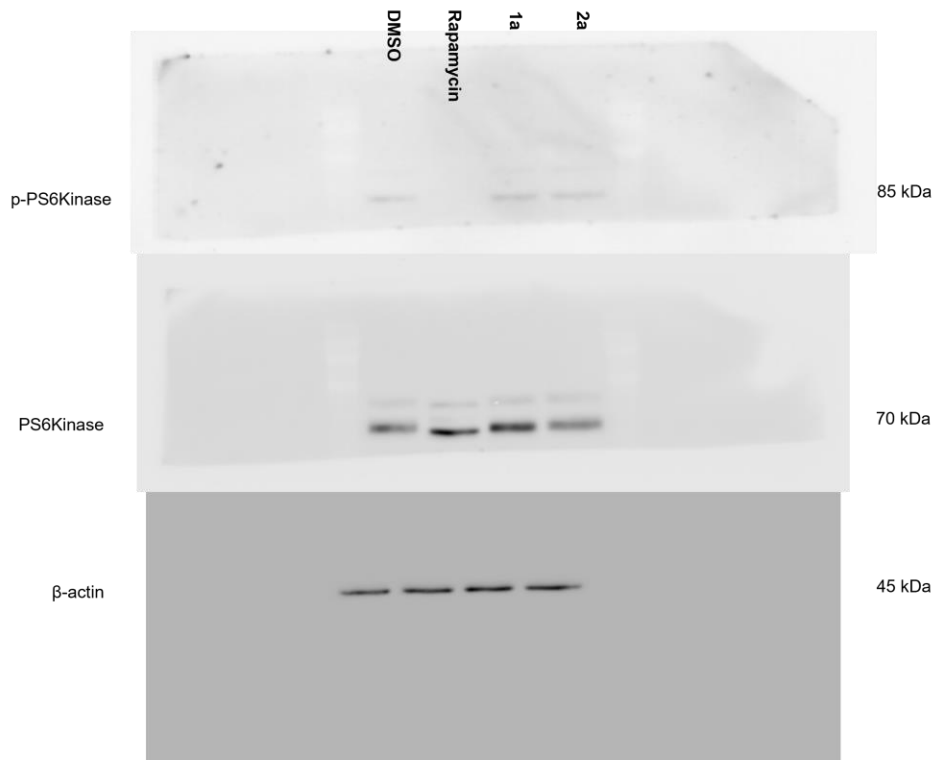

**Figure 1G**

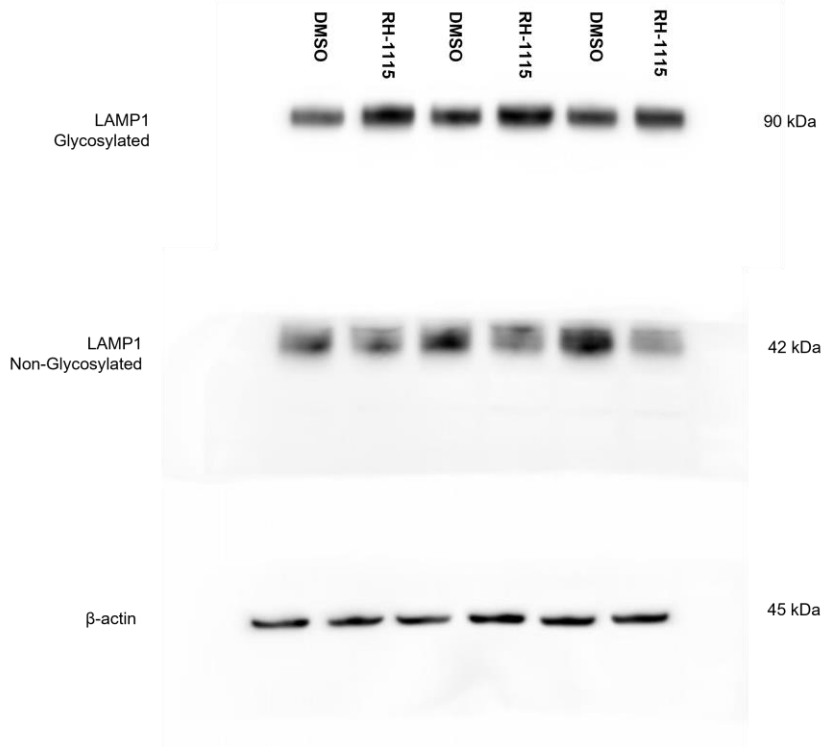

**Figure 3C**

Lamin A  
Lamin C

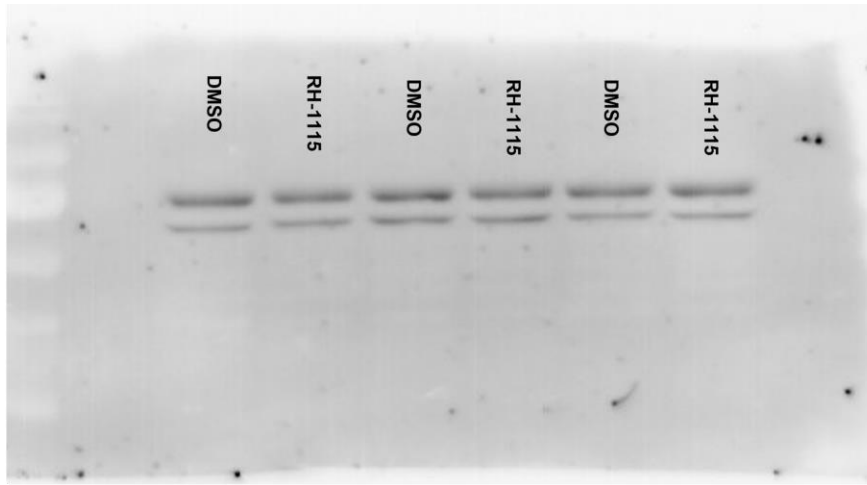

$\beta$ -actin

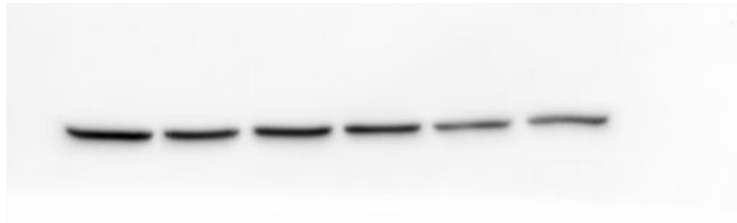

**Figure 3D, S3A**

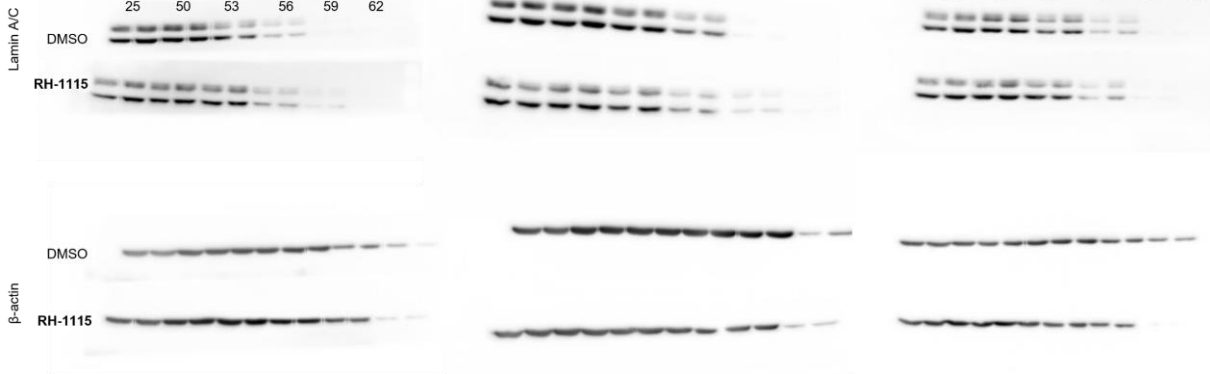

**Figure 3E, S3C**

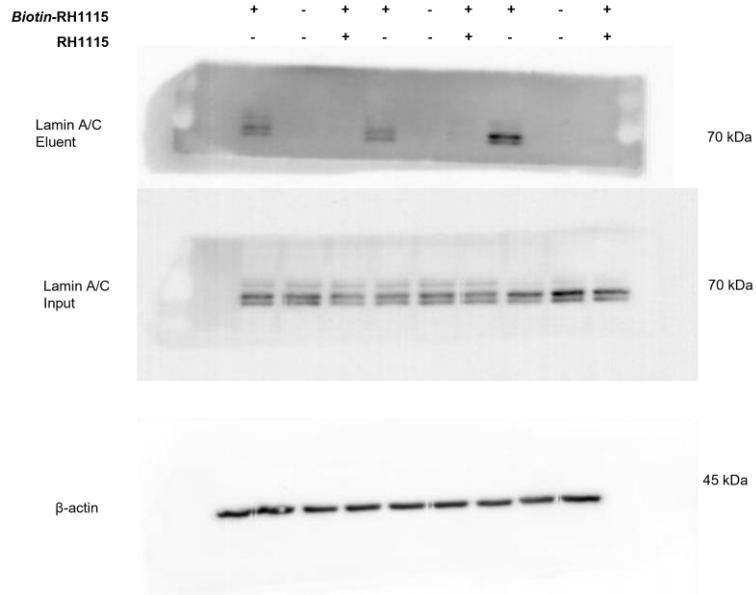

**Figure 3F**

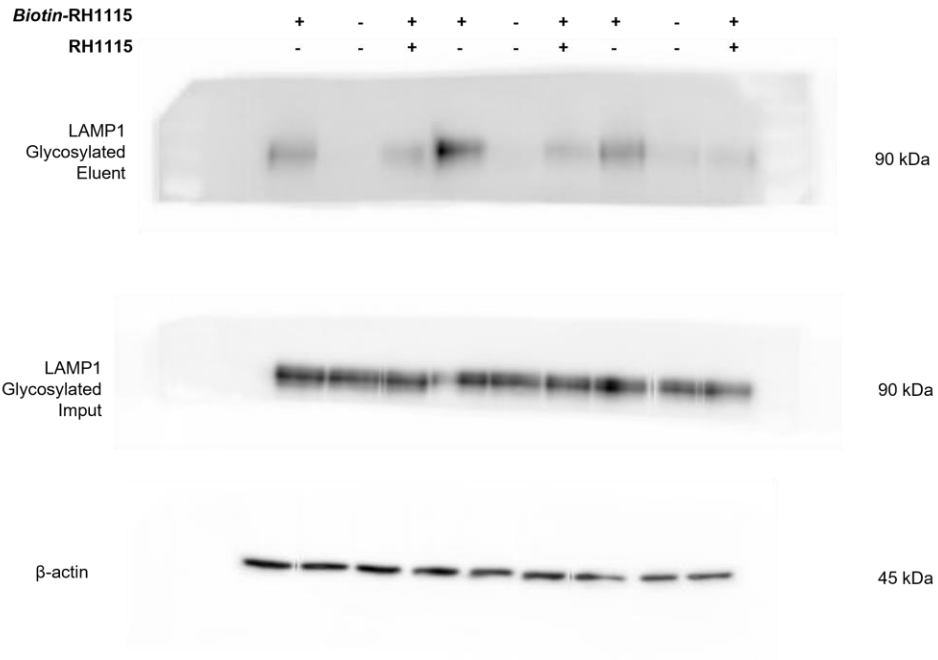

**Figure 3G**

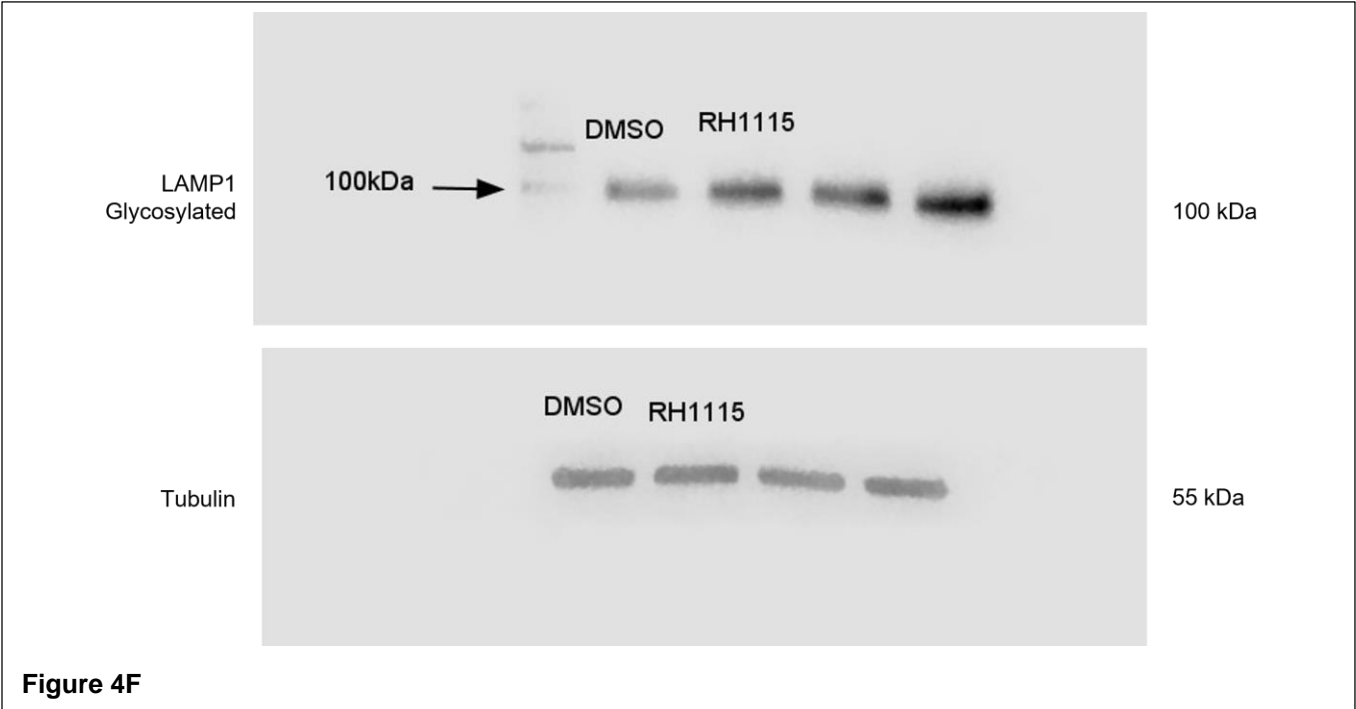

Figure 4F

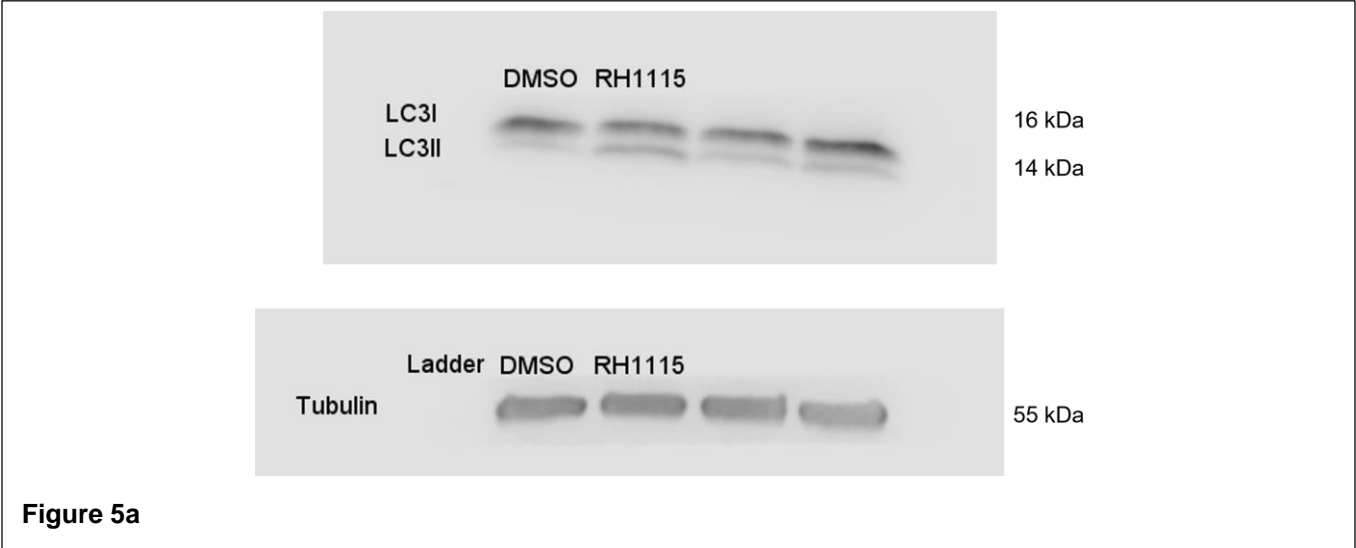

Figure 5a

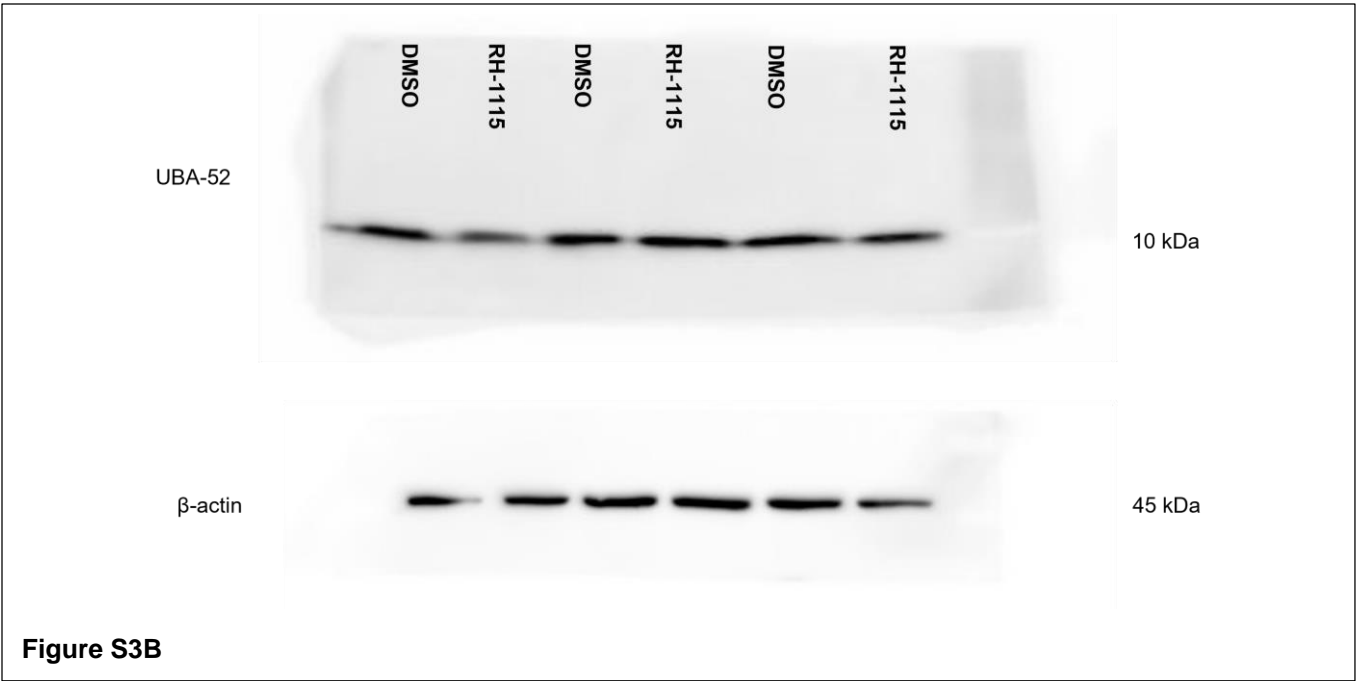

**Figure S3B**

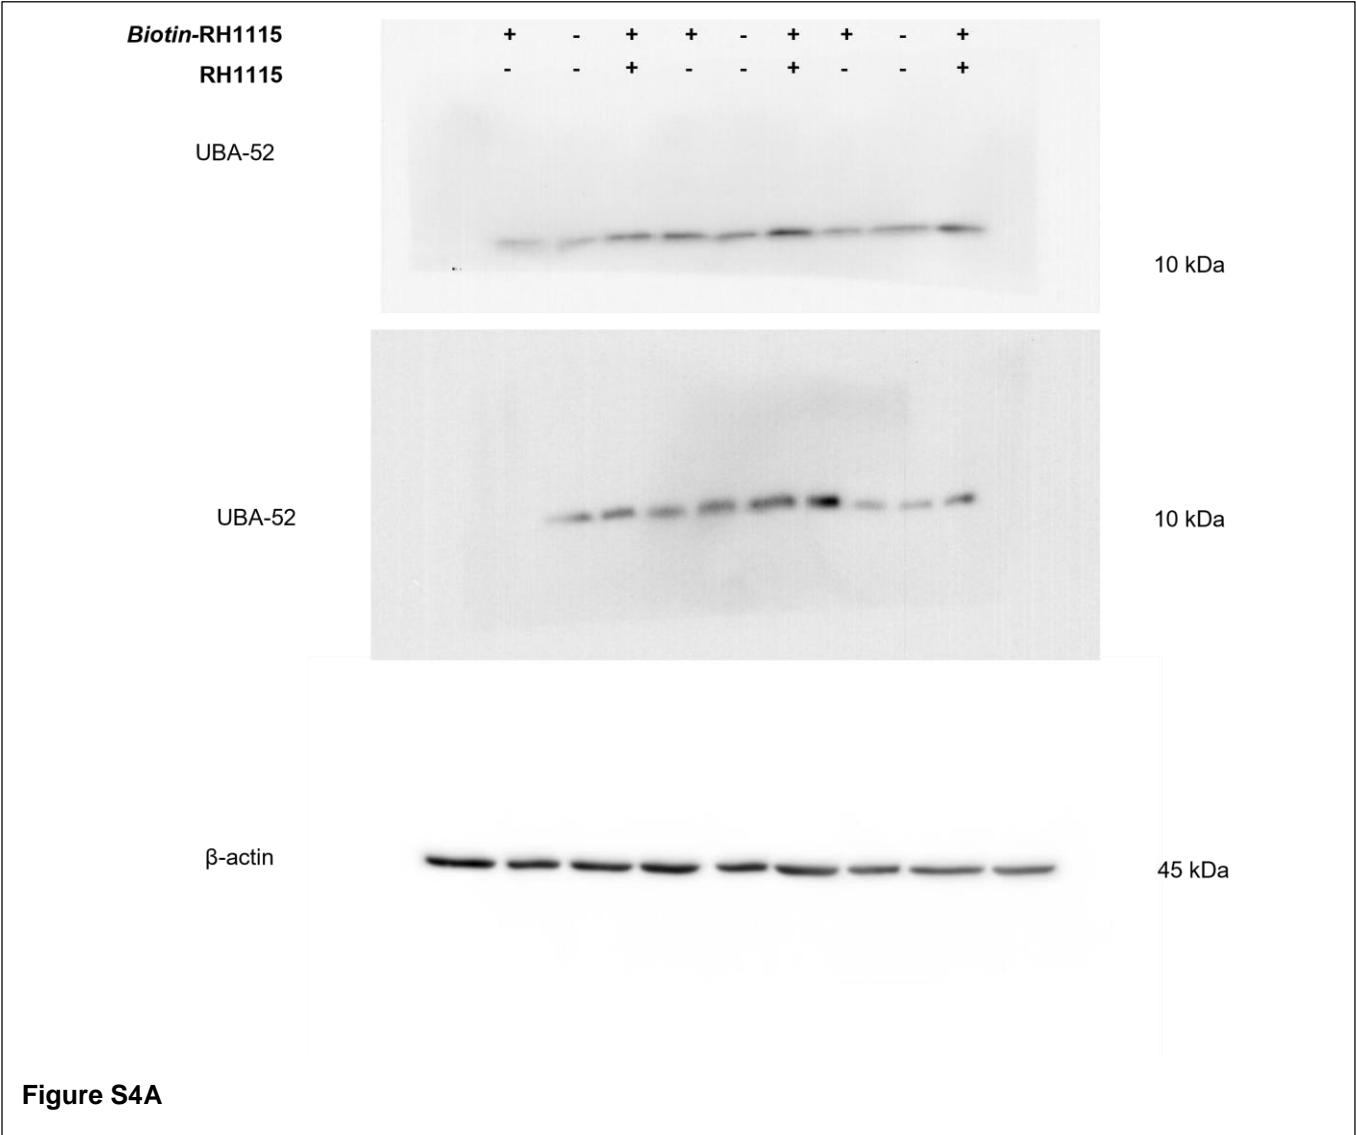

**Figure S4A**

## **References**

- (1) Brain tissue expression of CALML5 Summary, The Human Protein Atlas.  
<https://www.proteinatlas.org/ENSG00000178372-CALML5/brain> (accessed 2023-04-11).



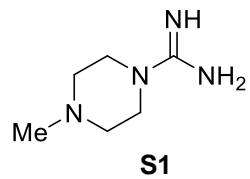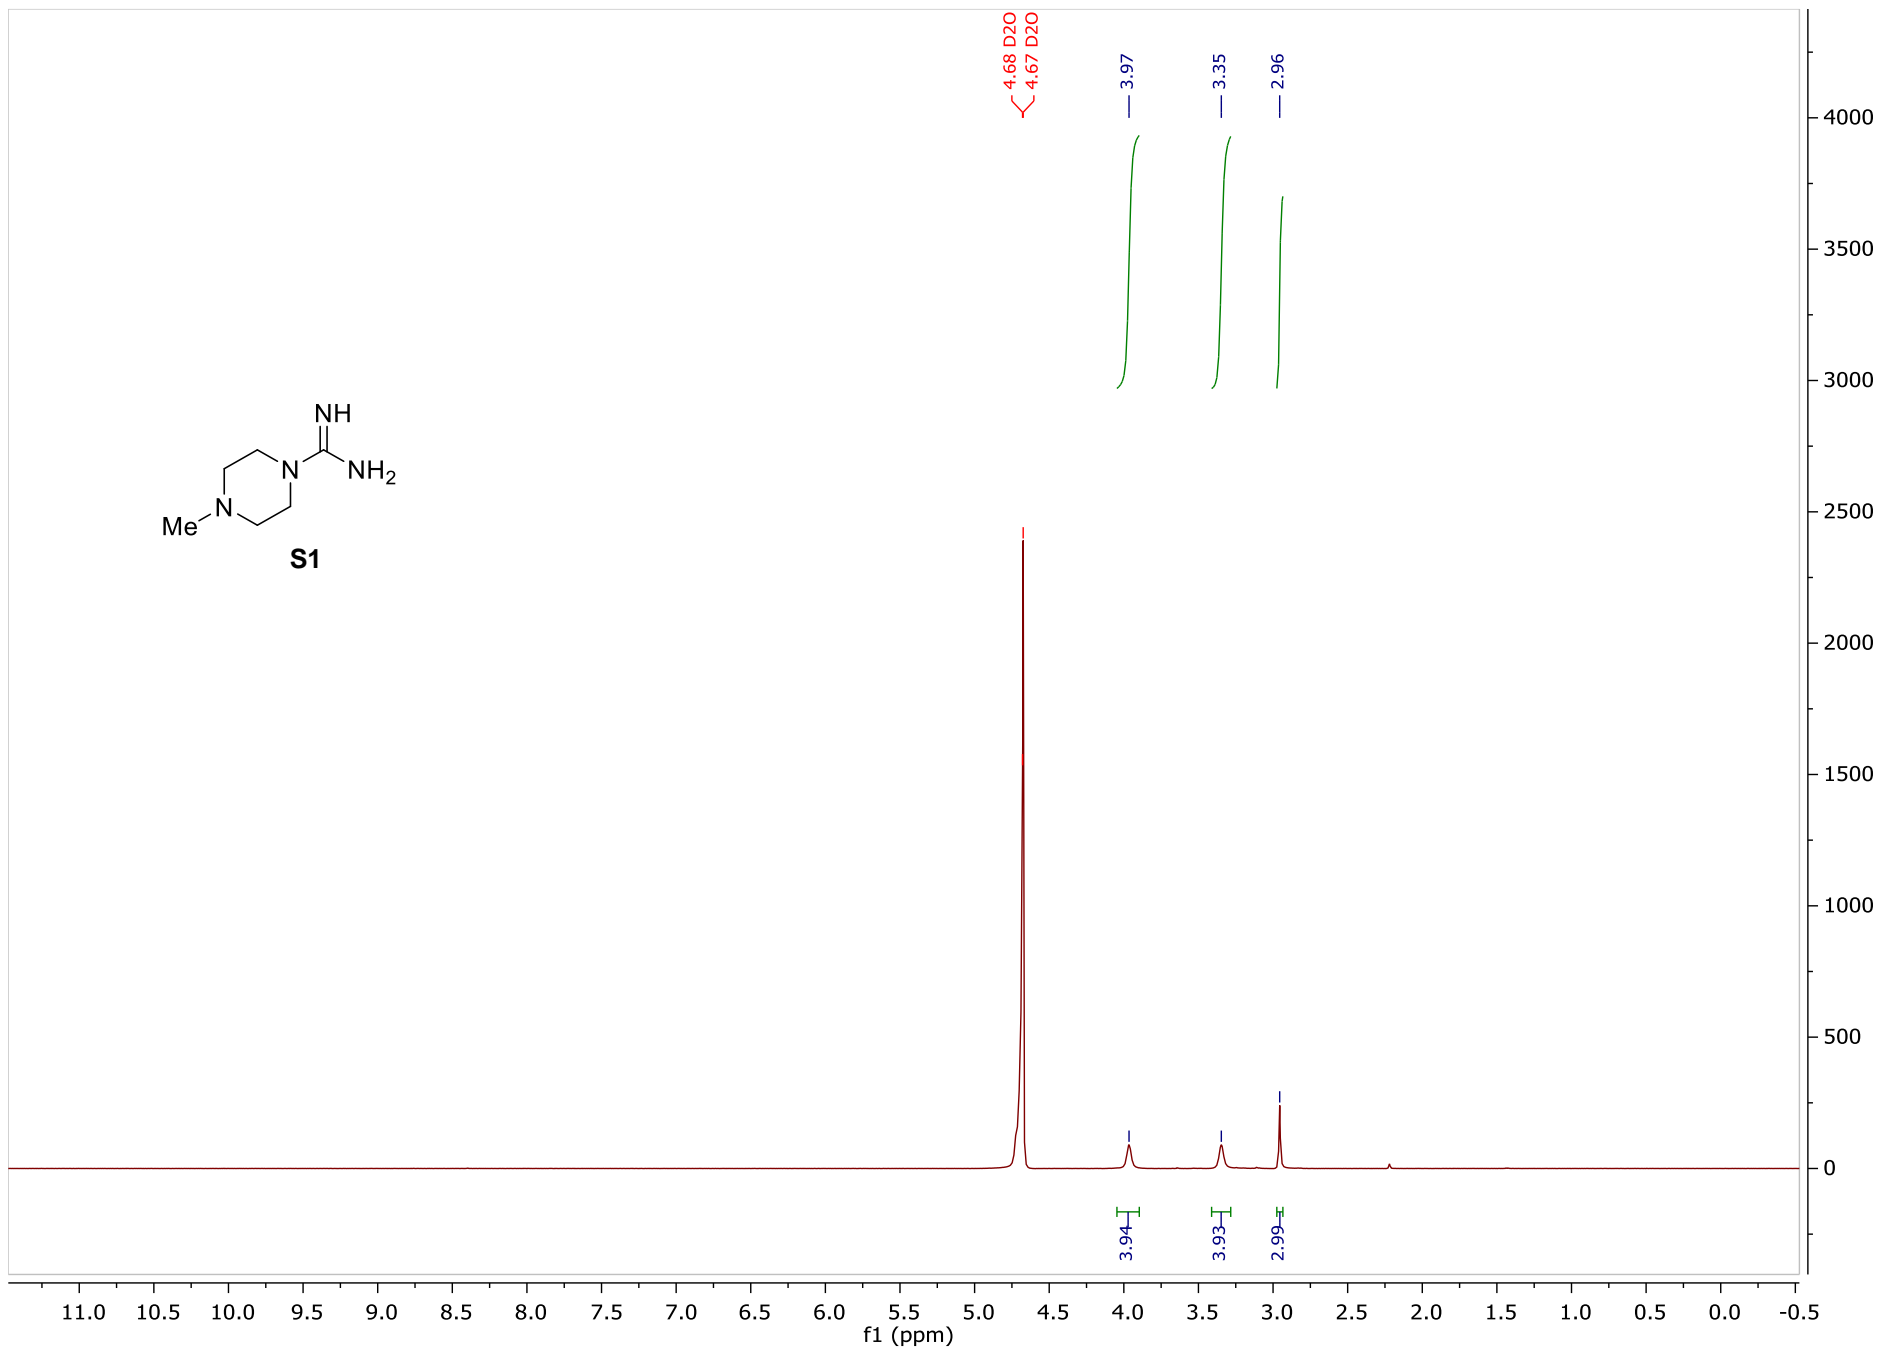

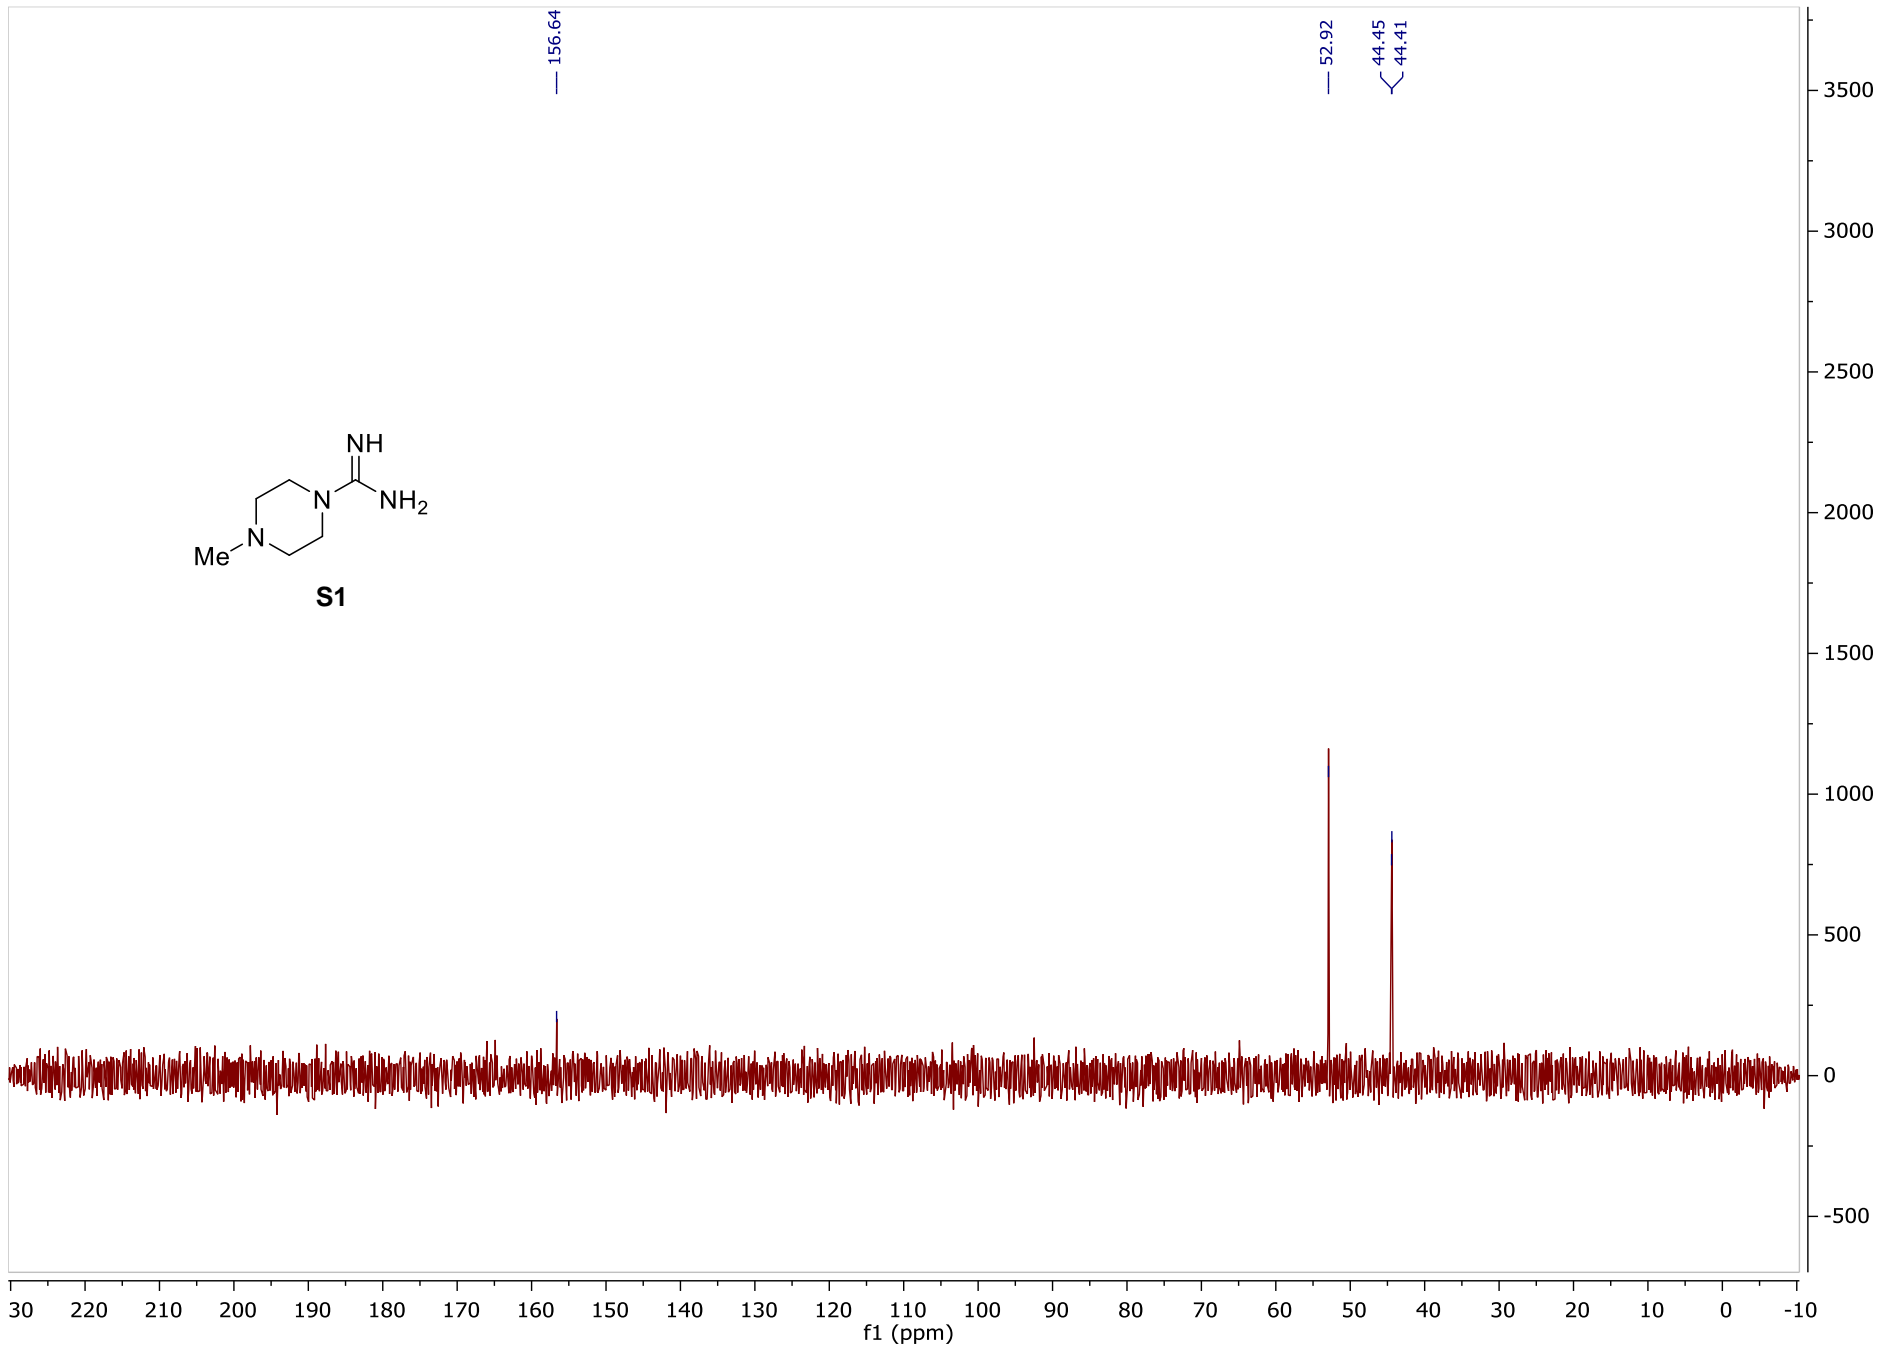

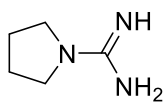

S2

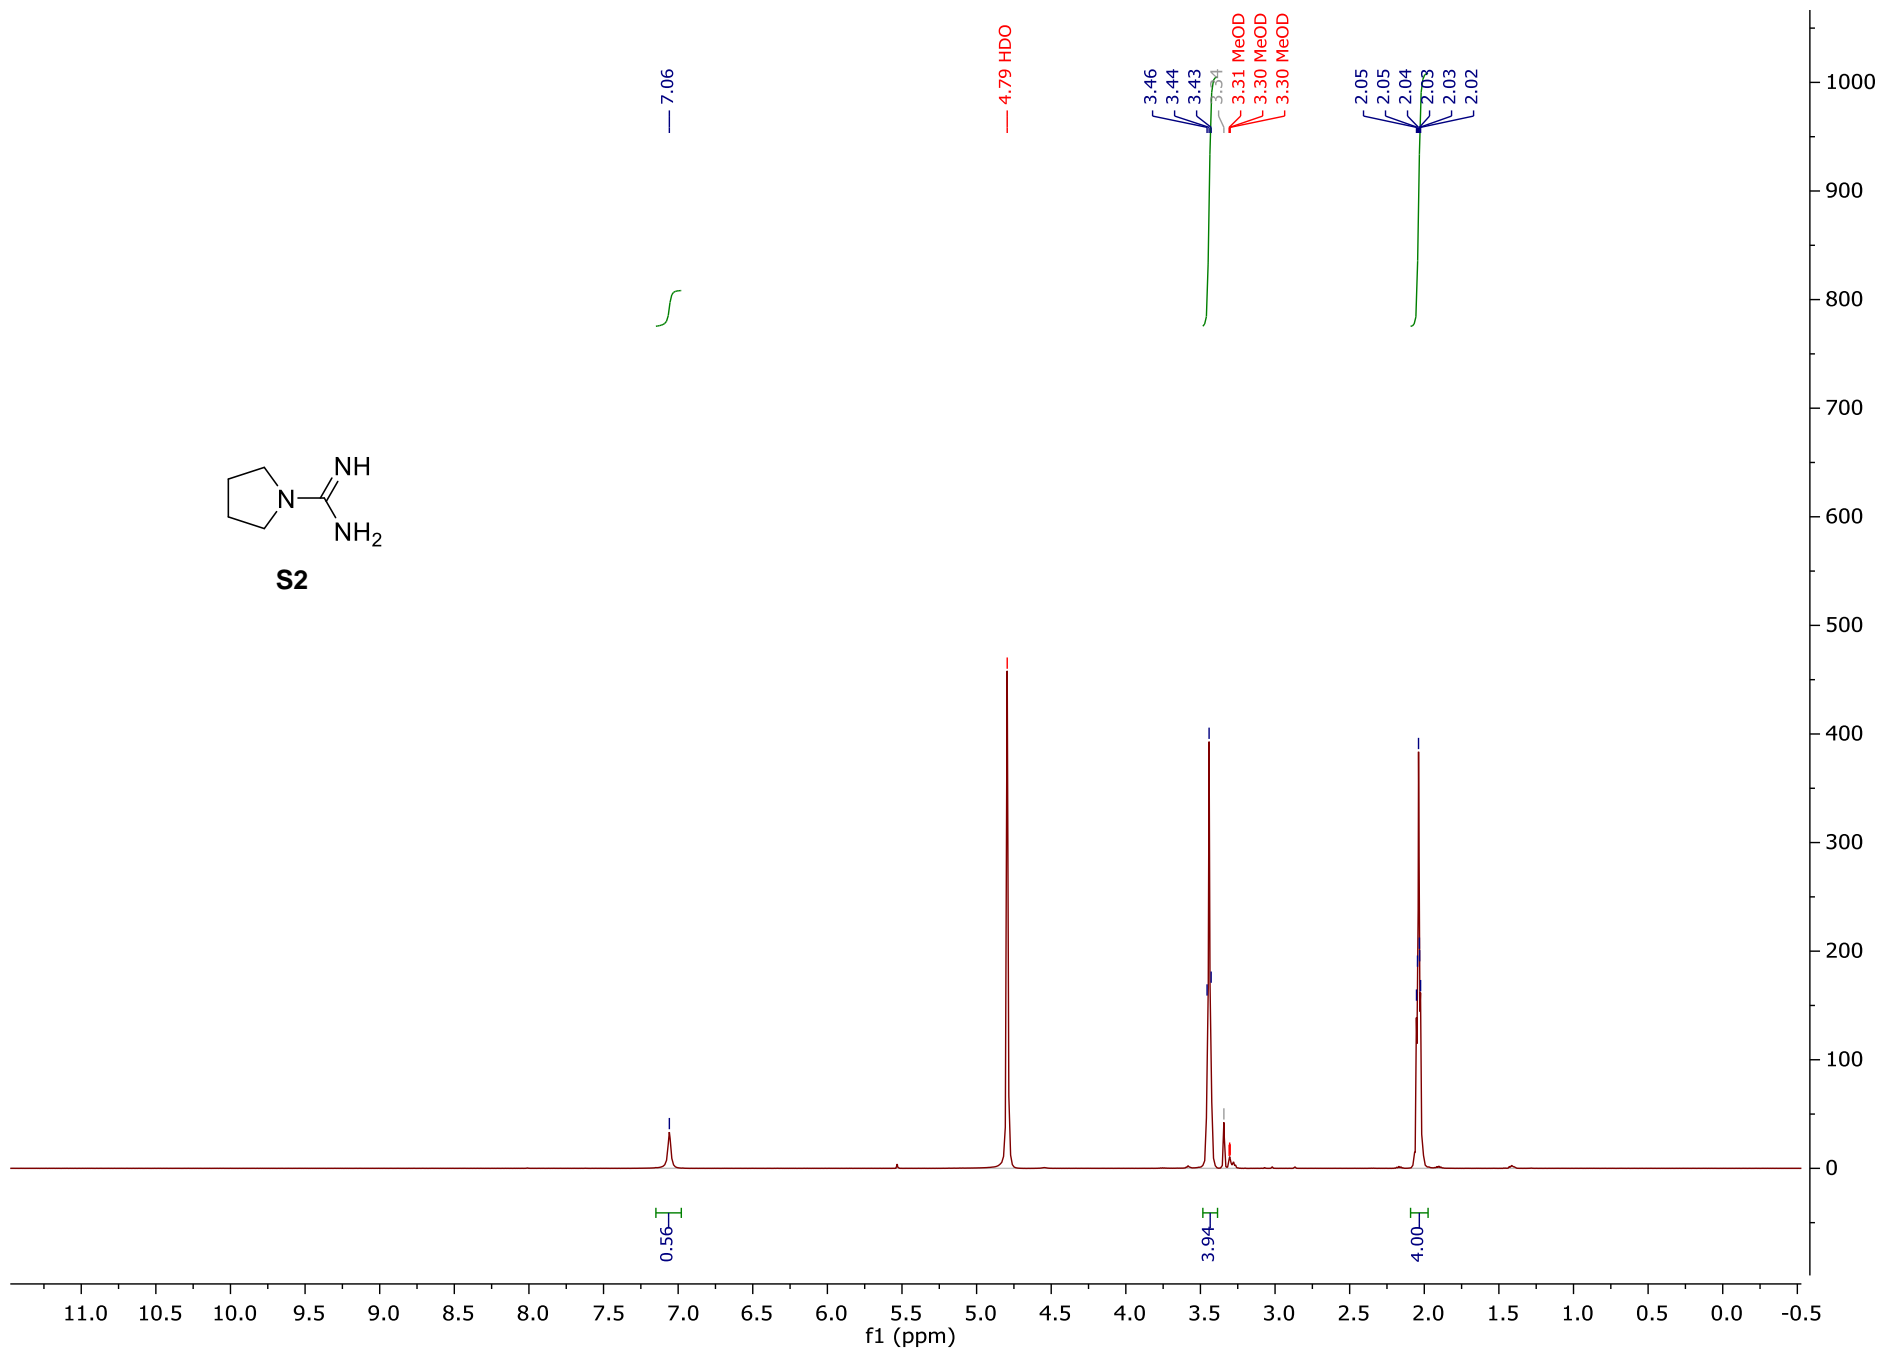

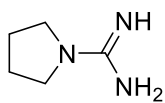

S2

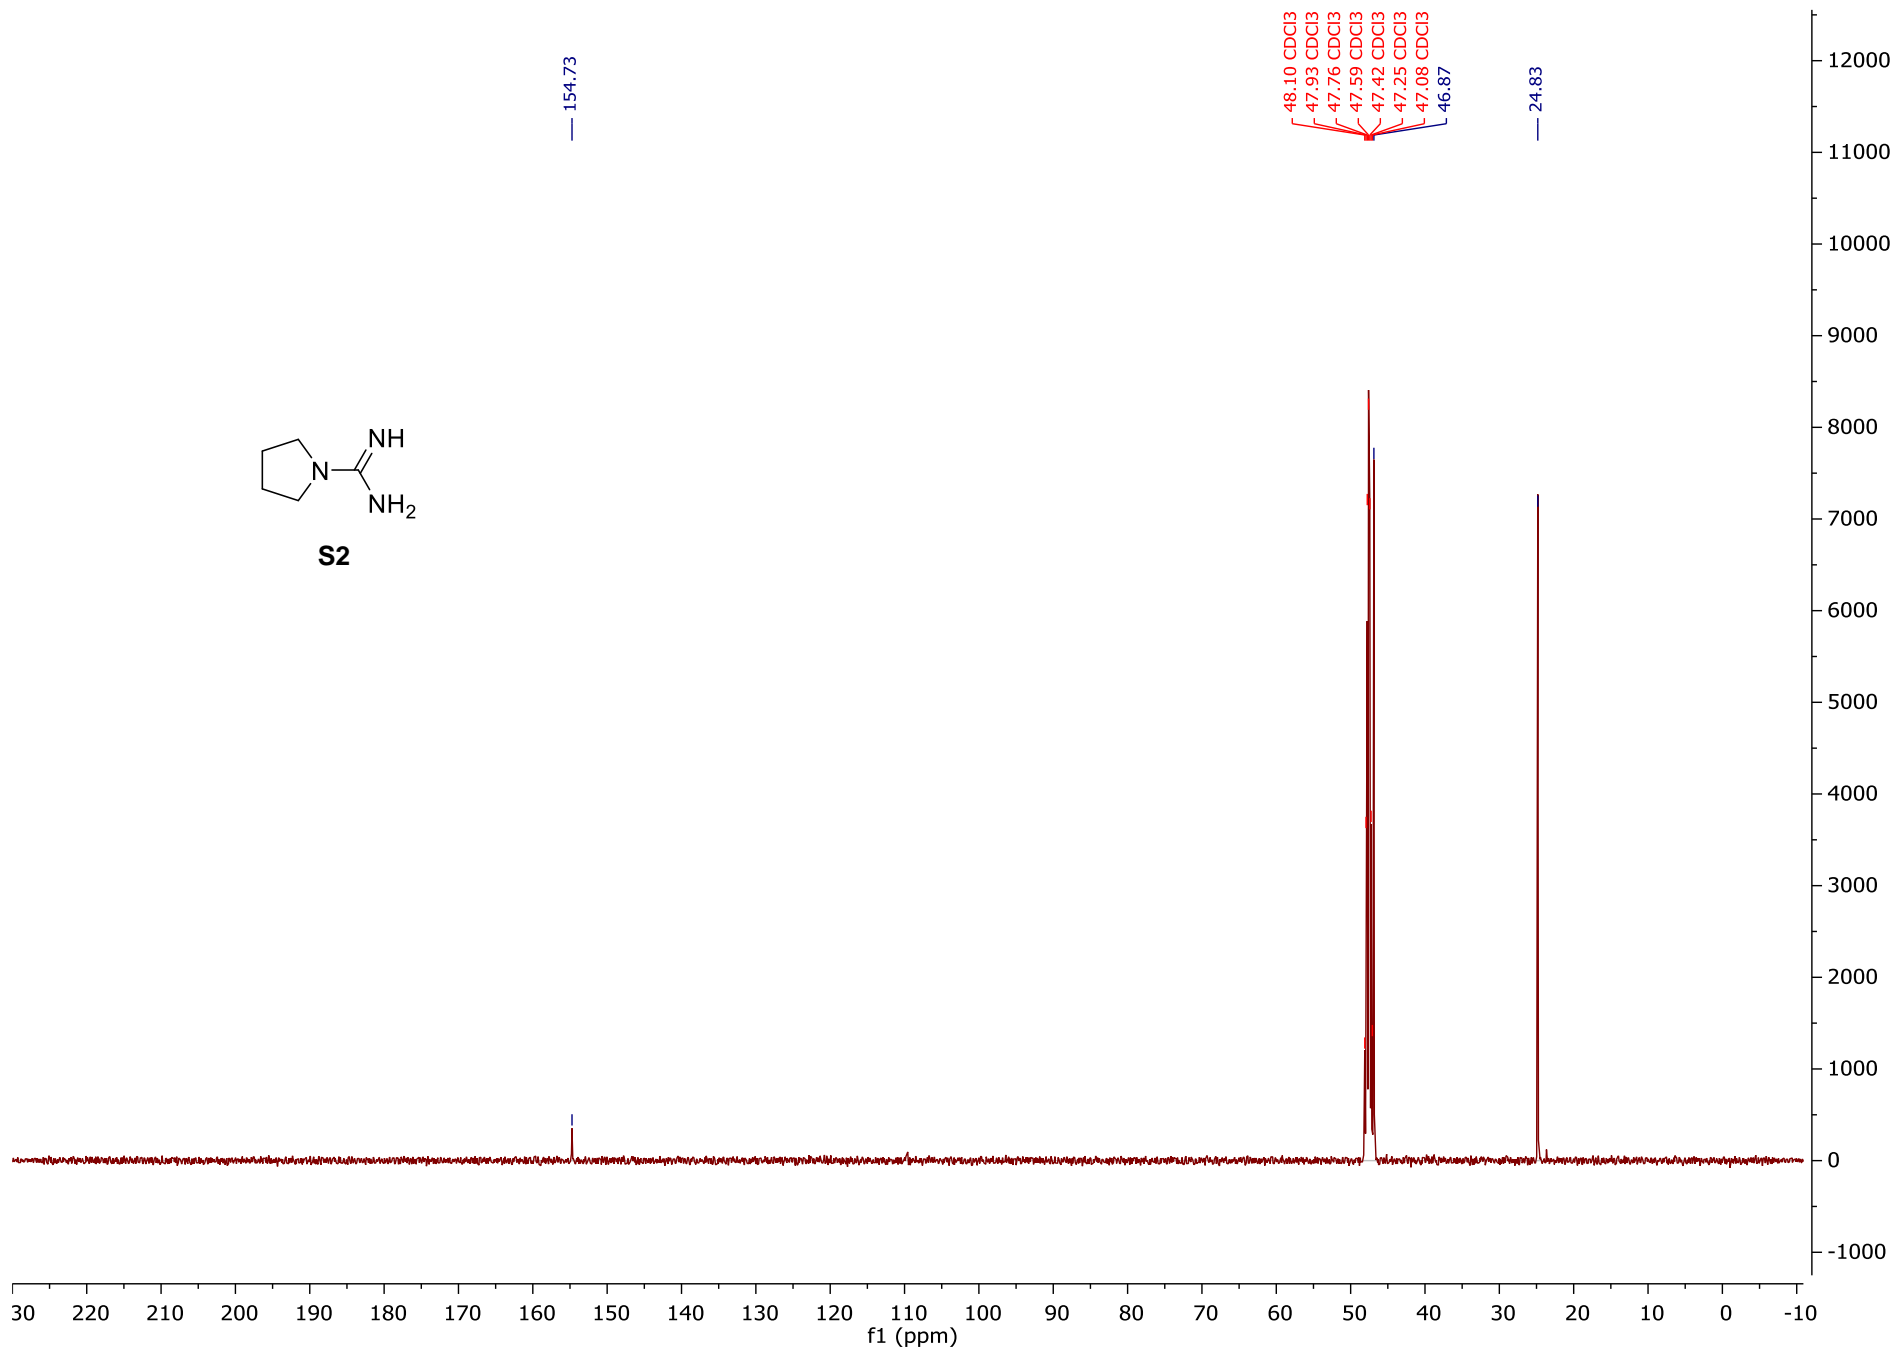

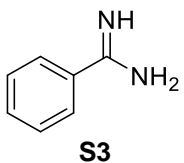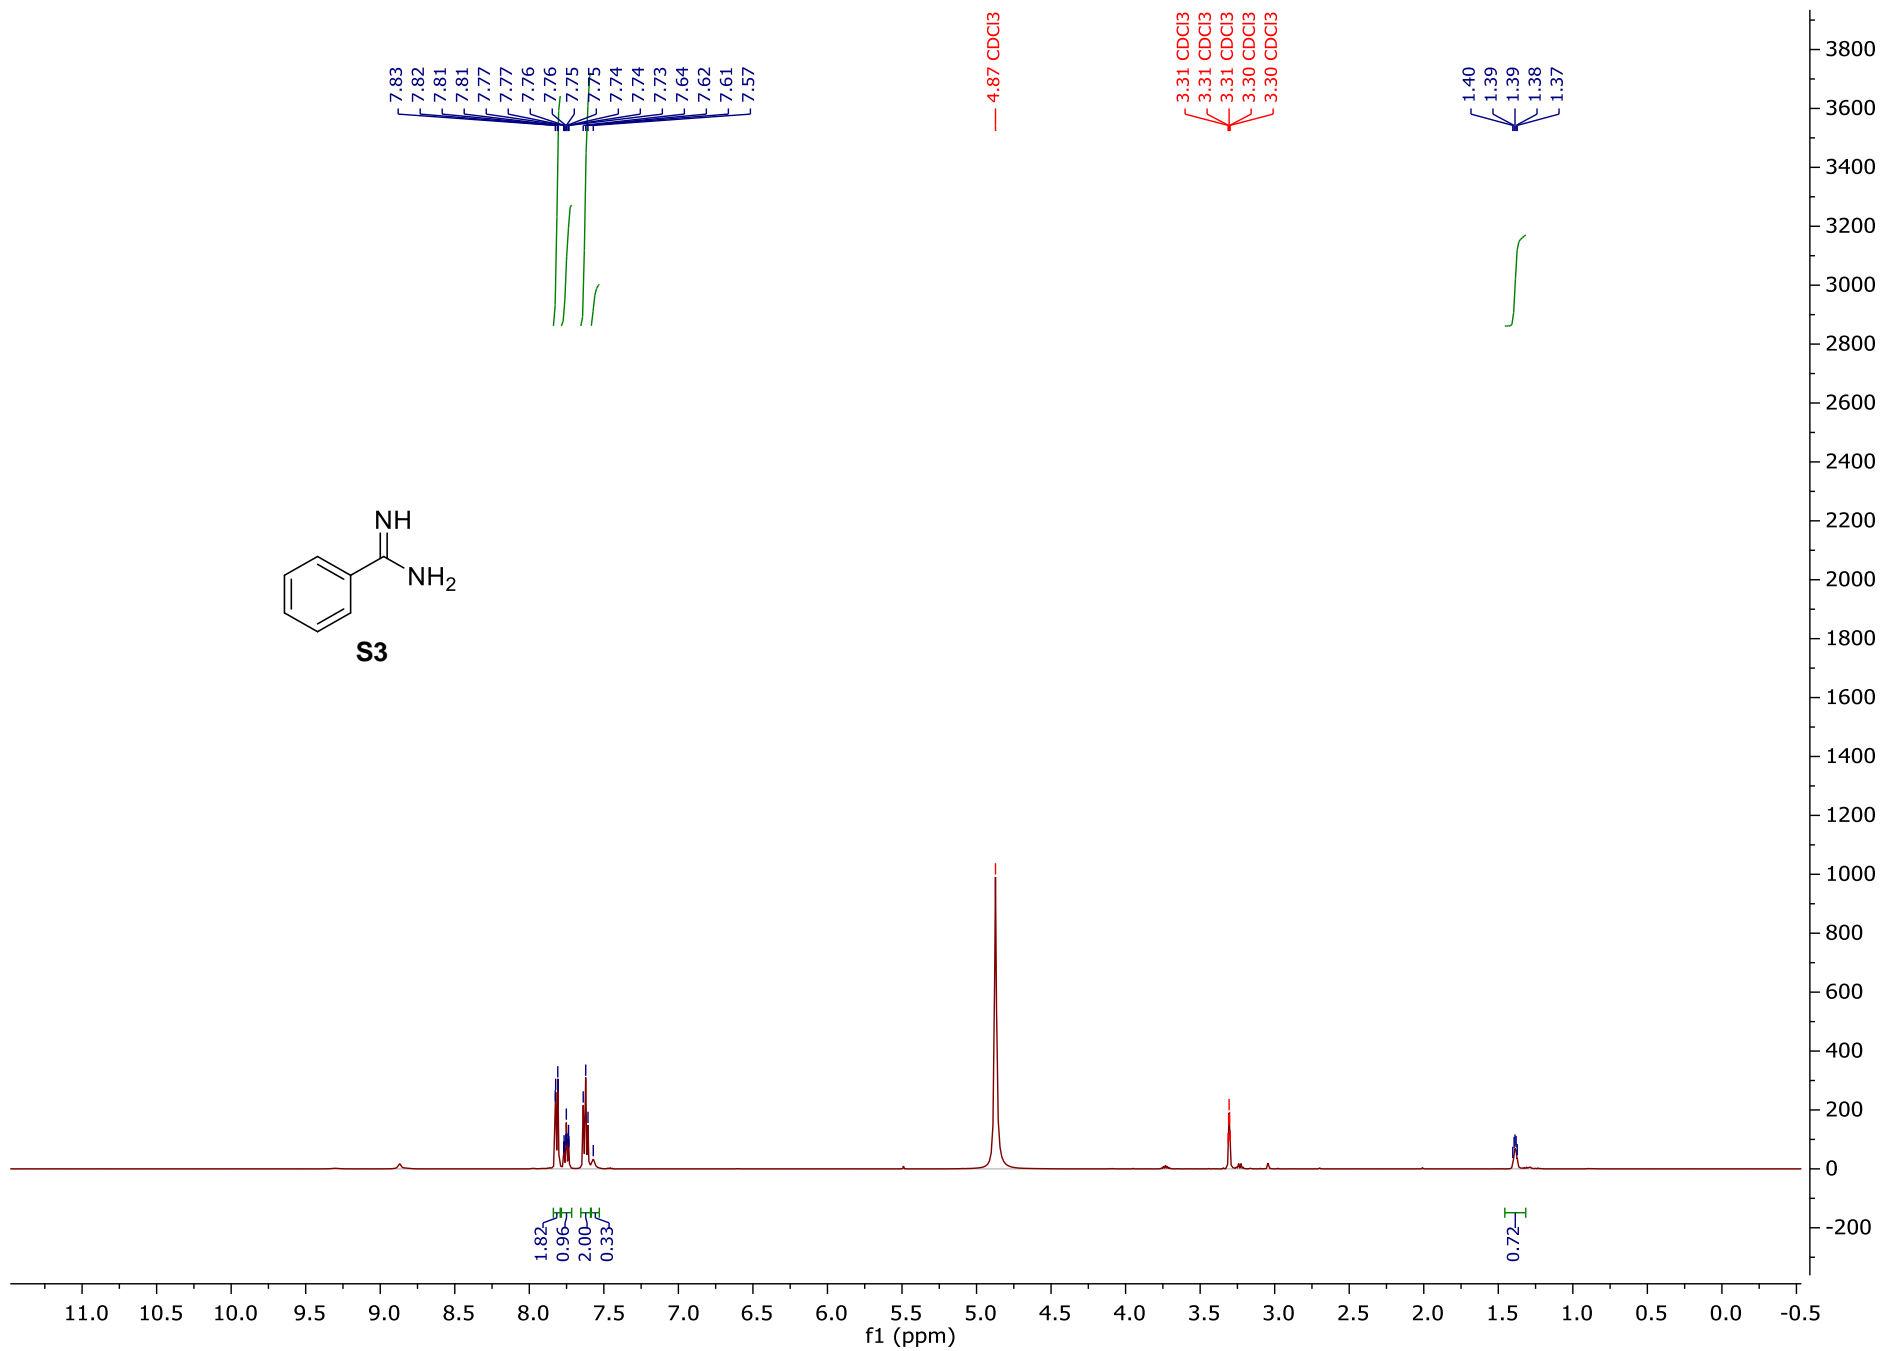

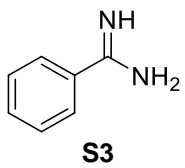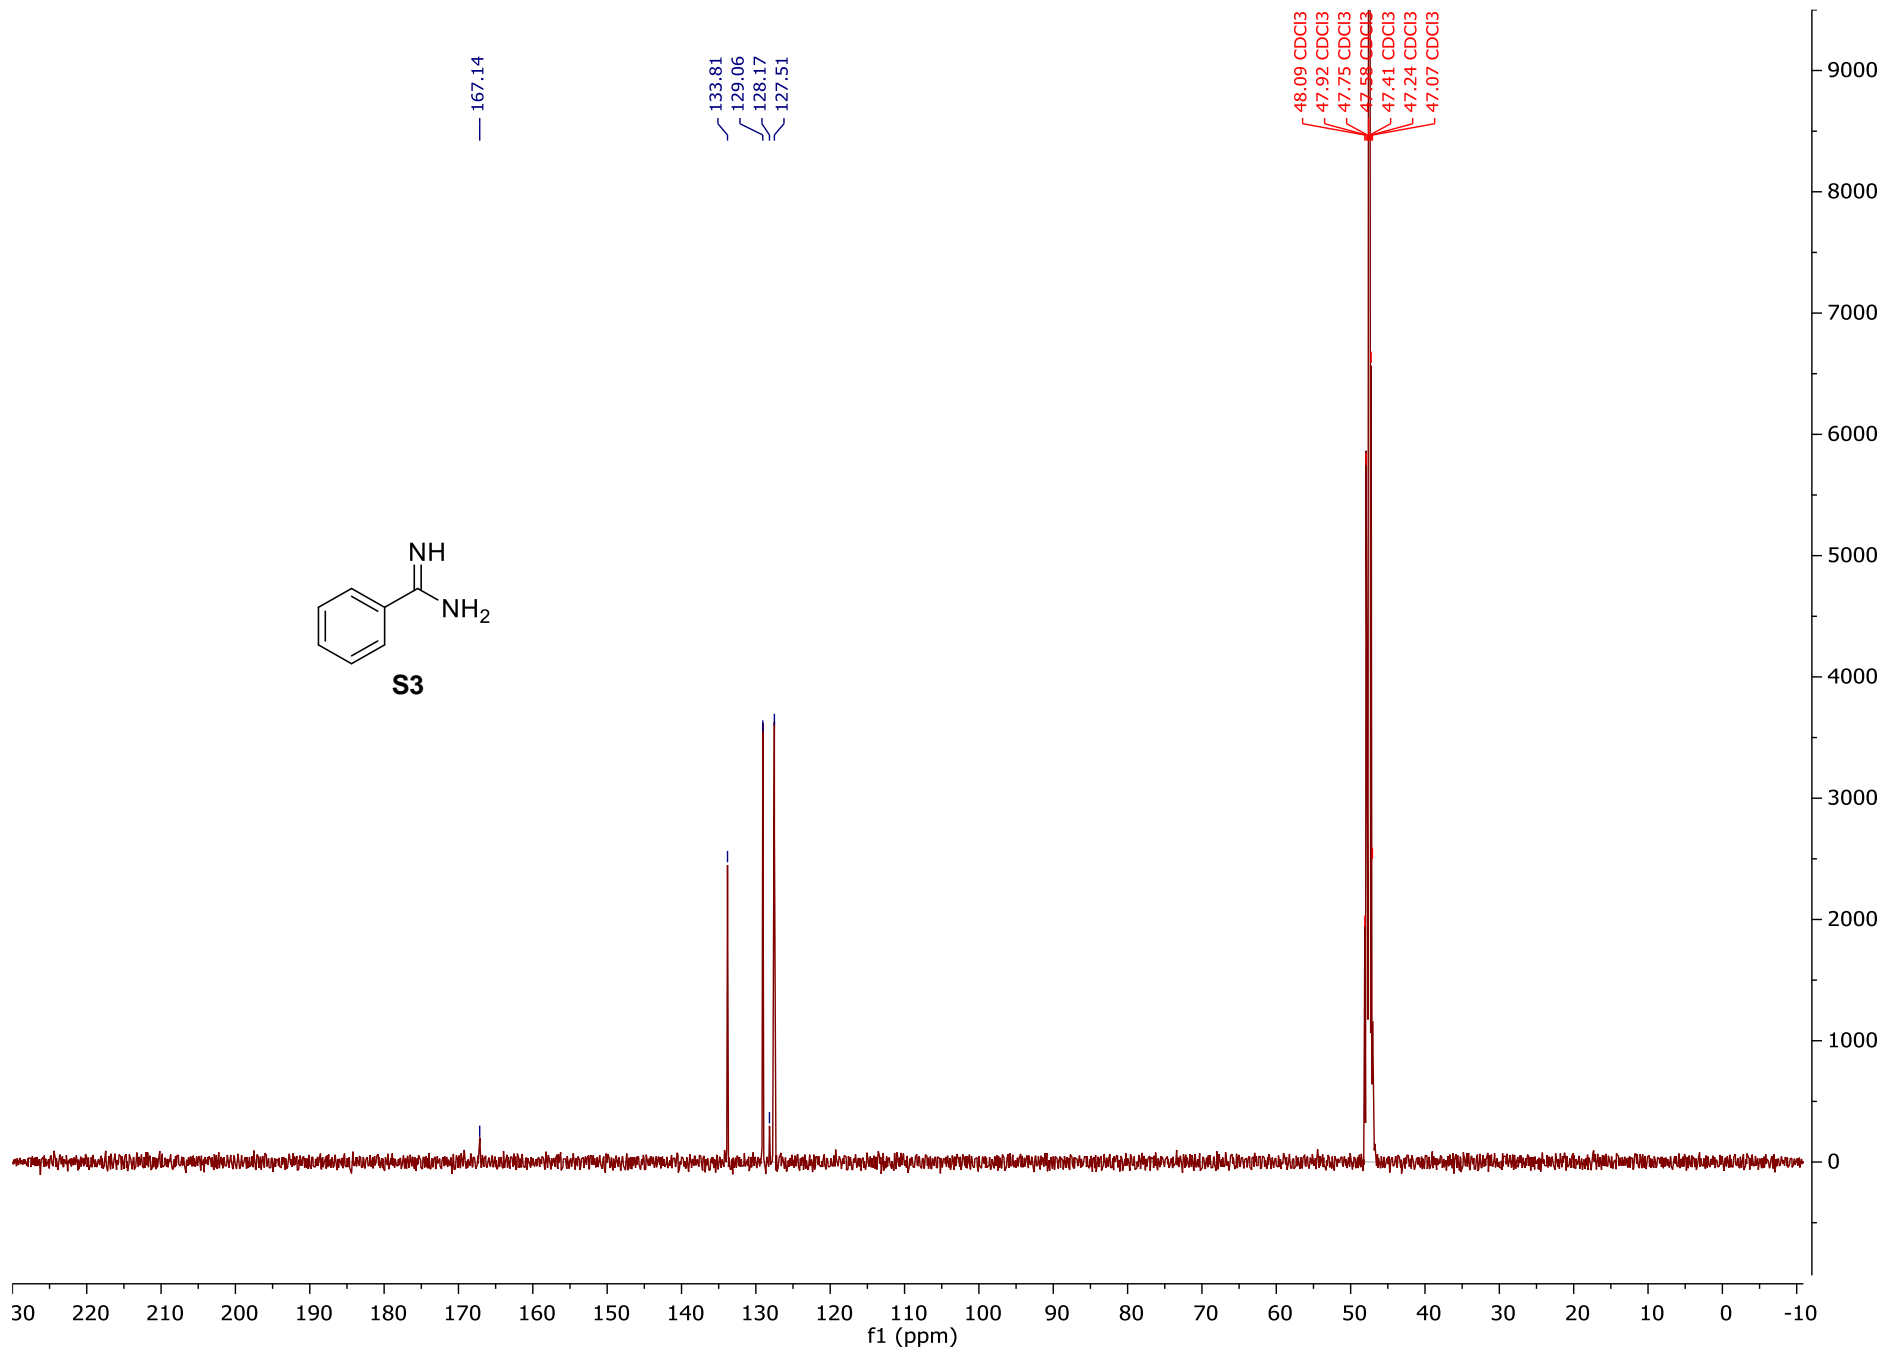

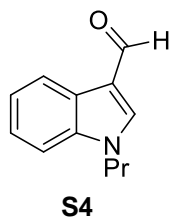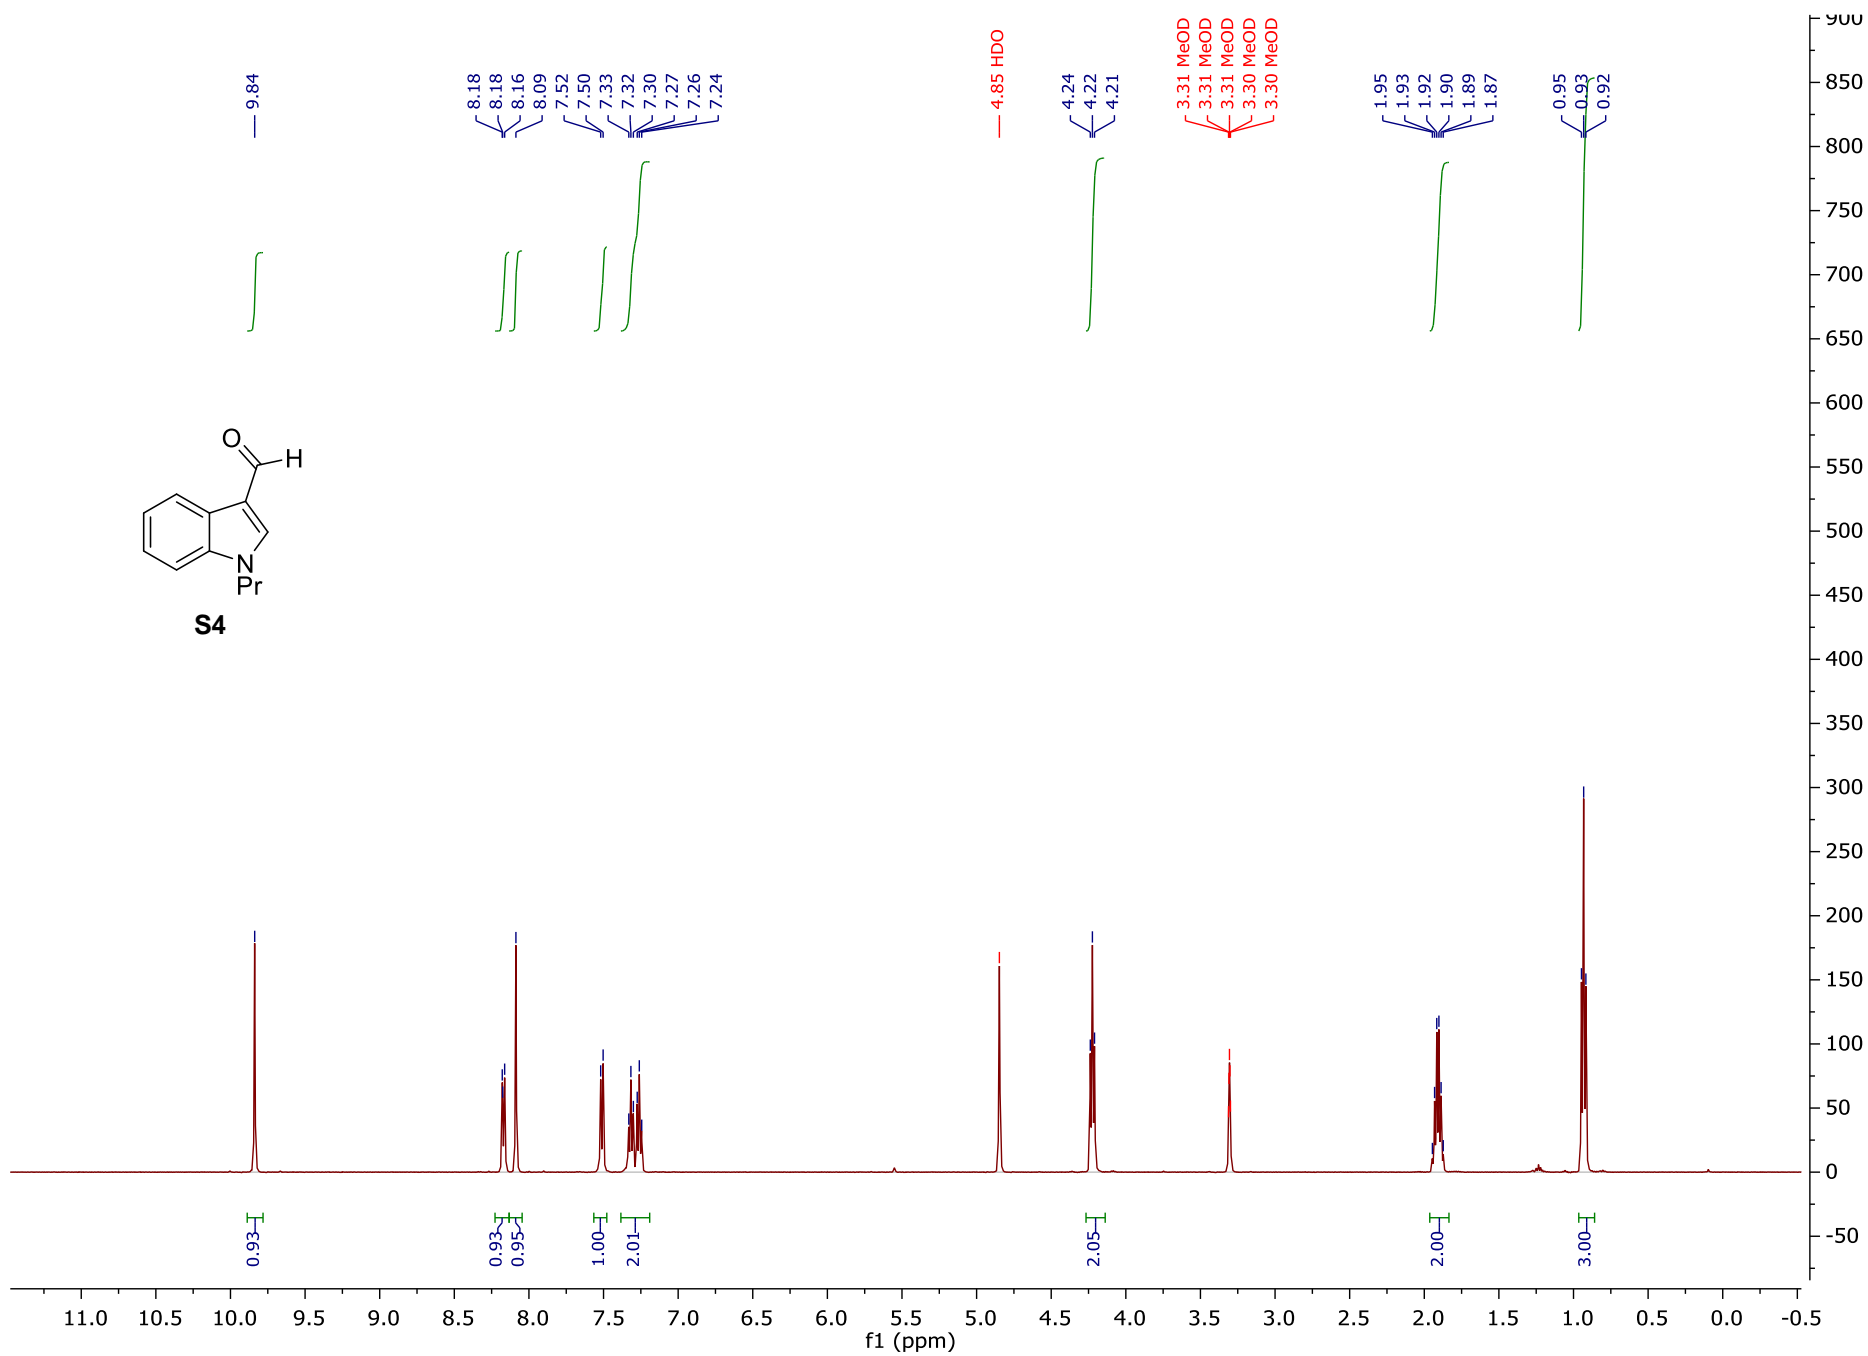

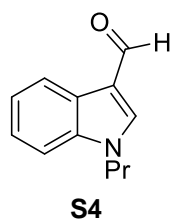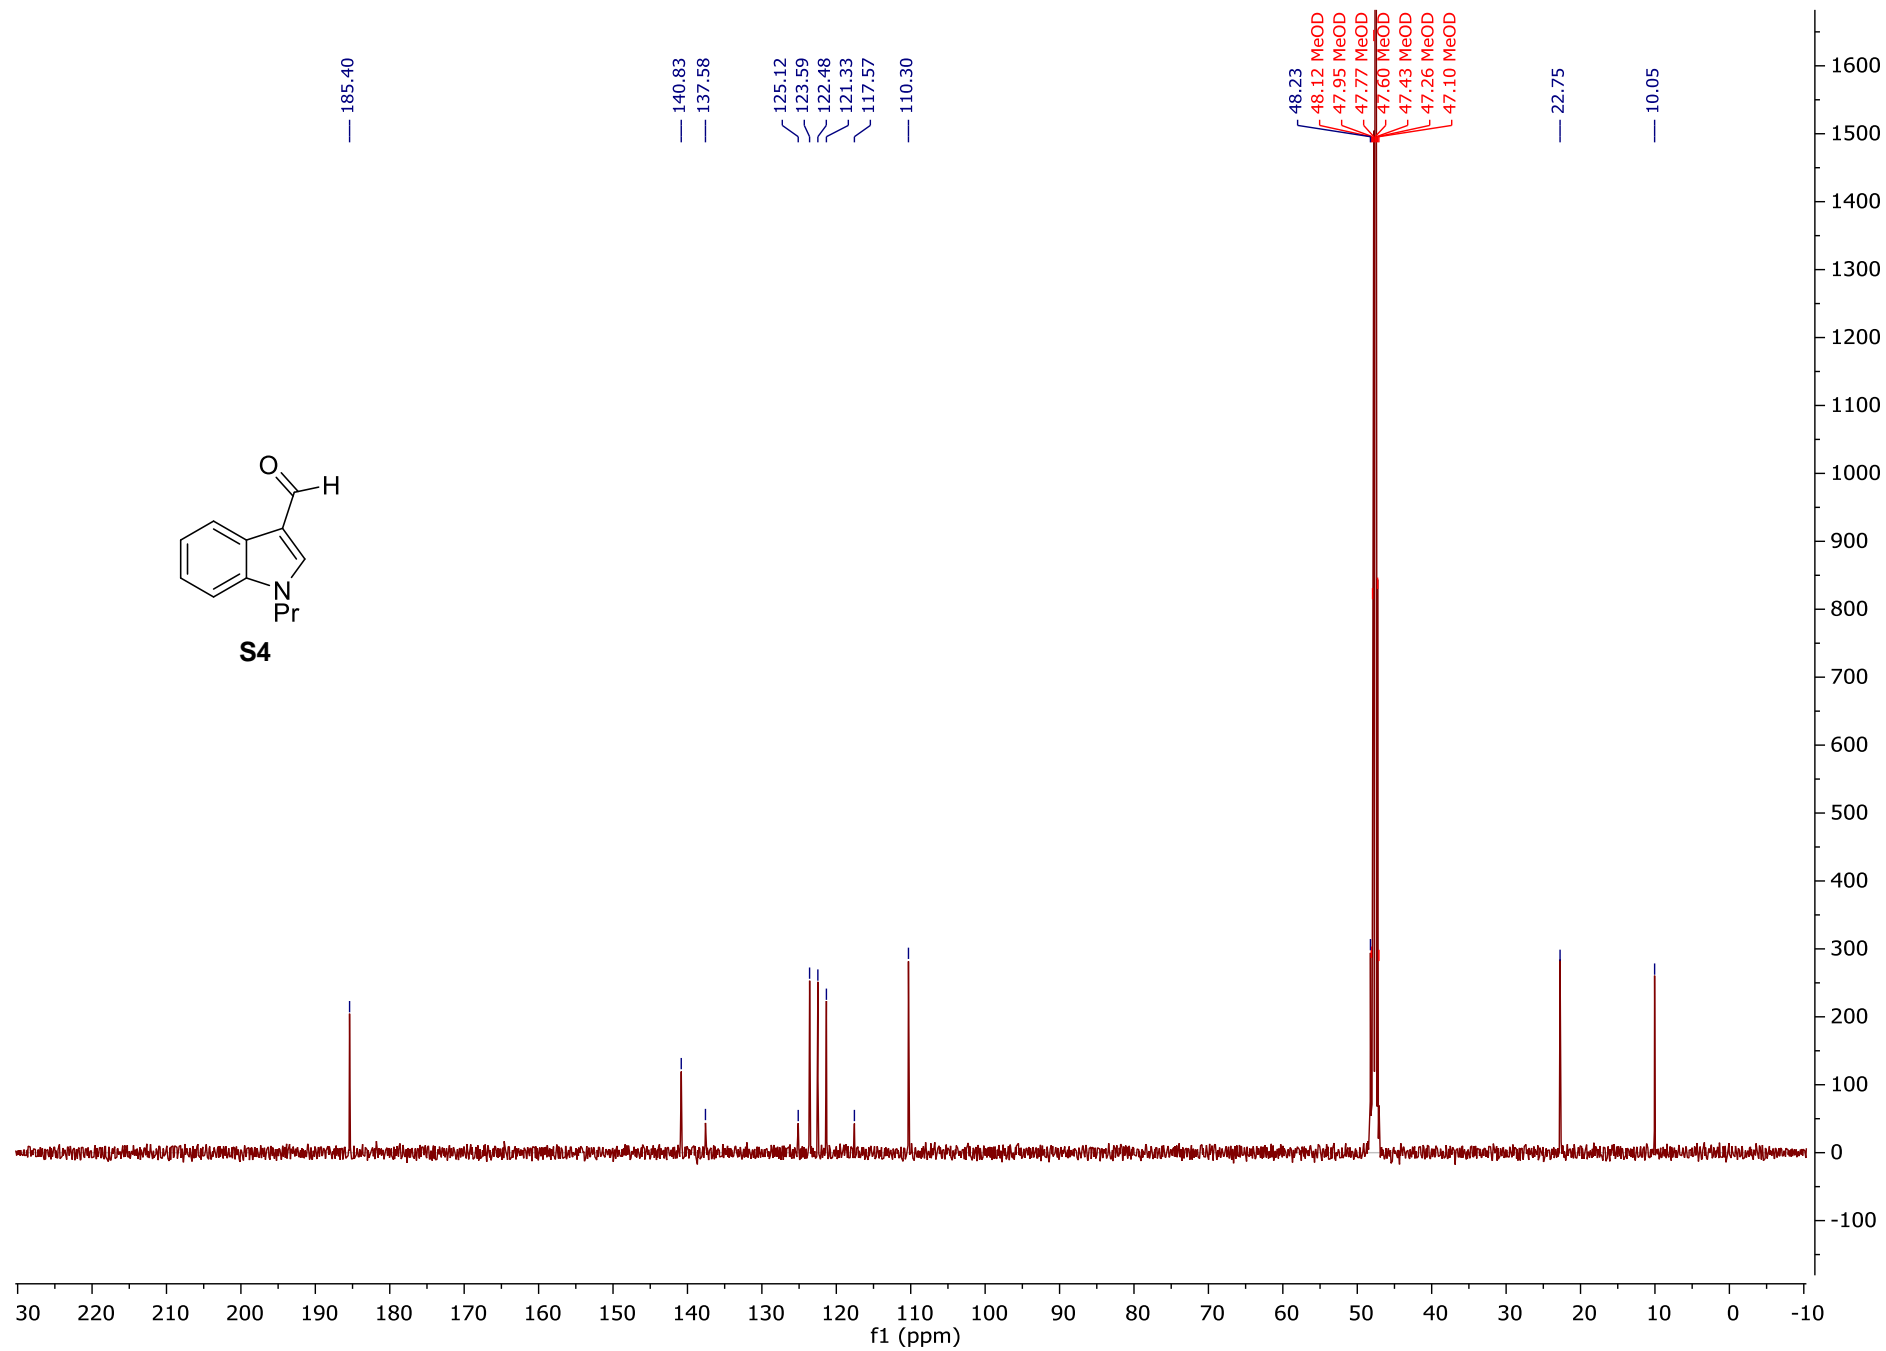



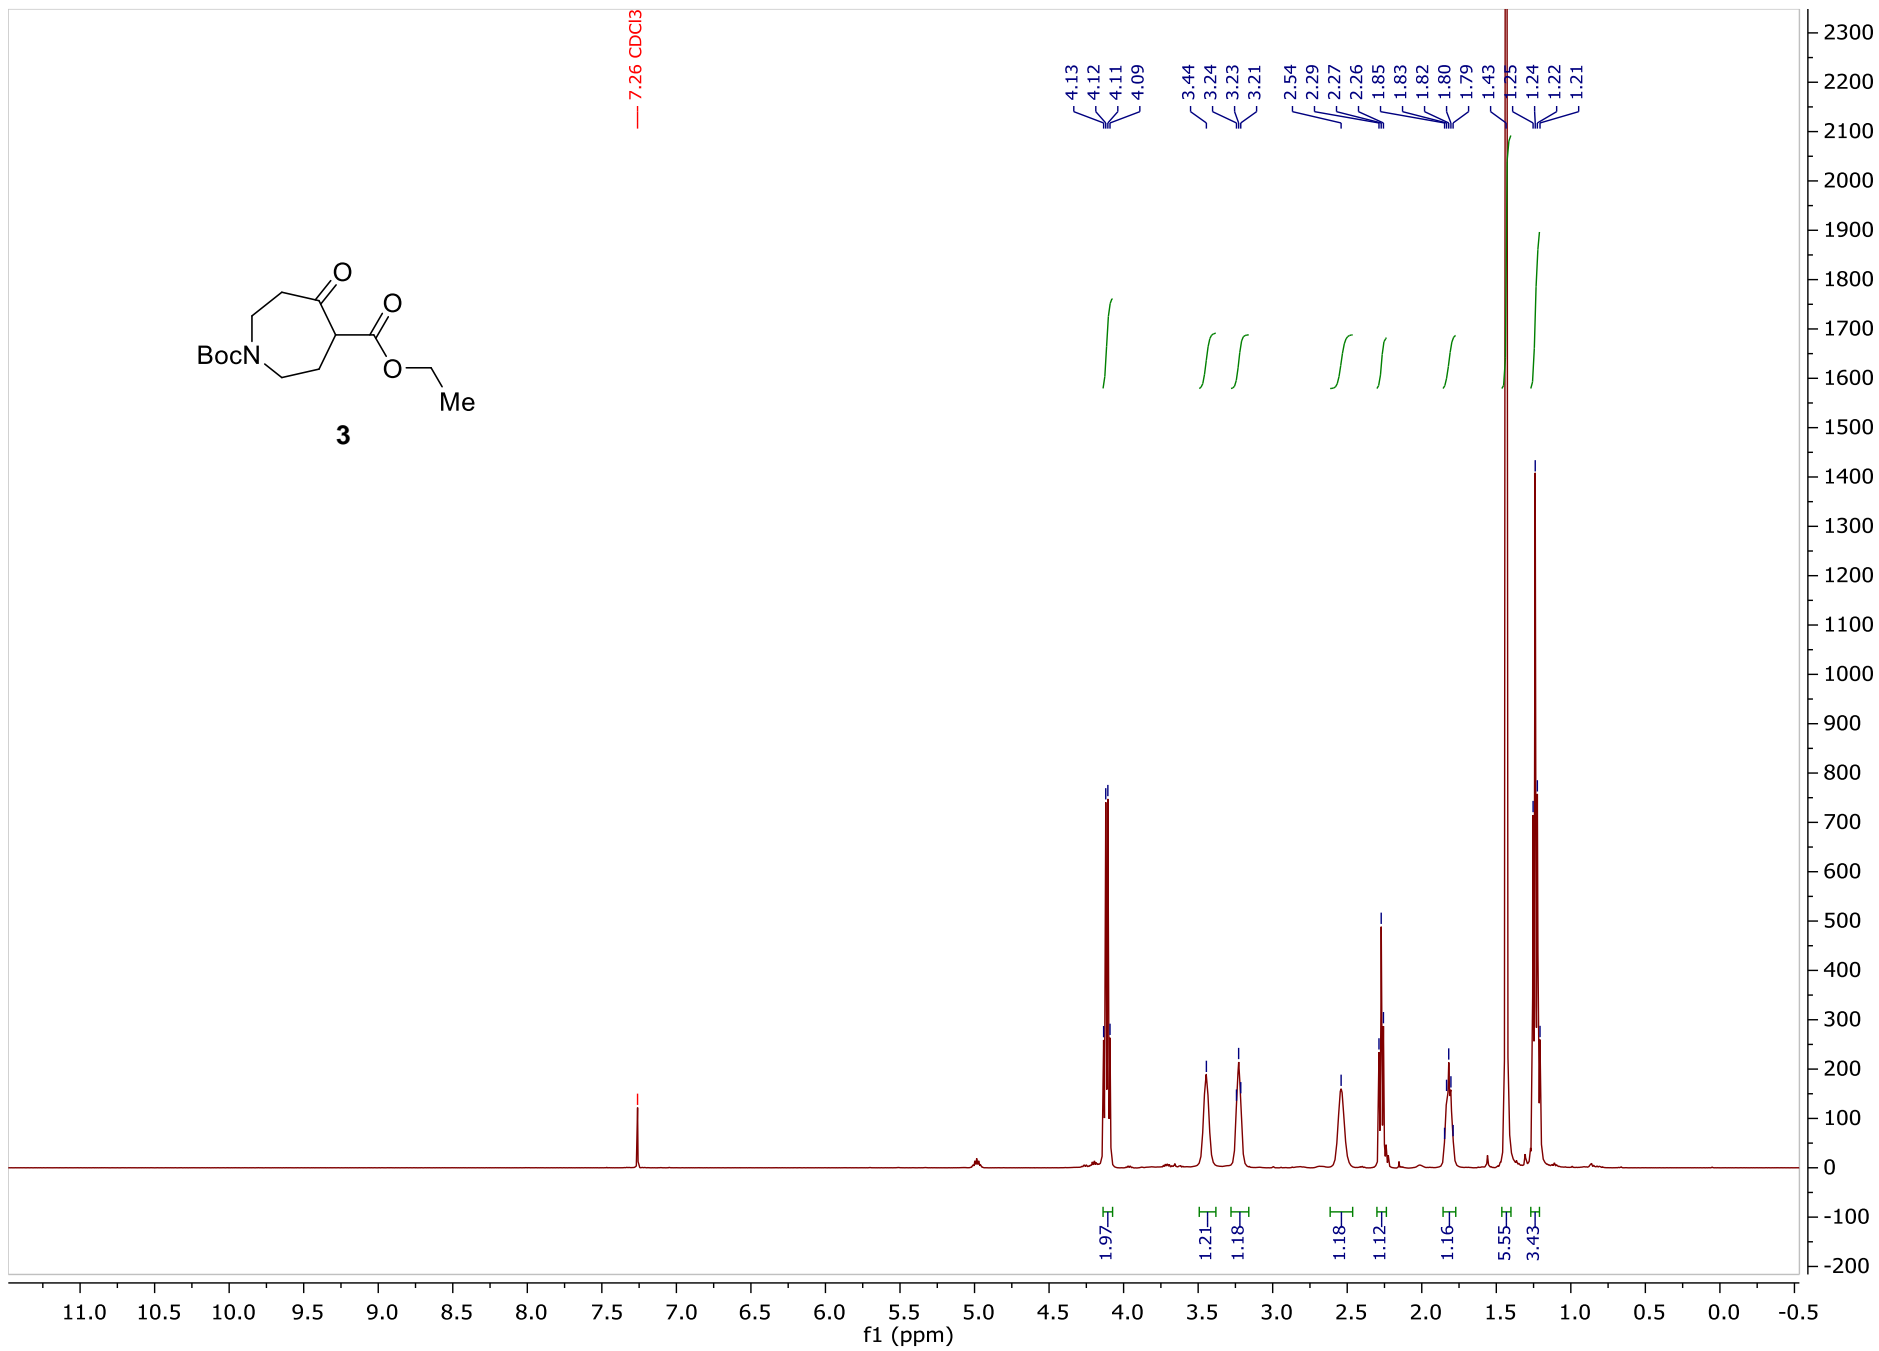

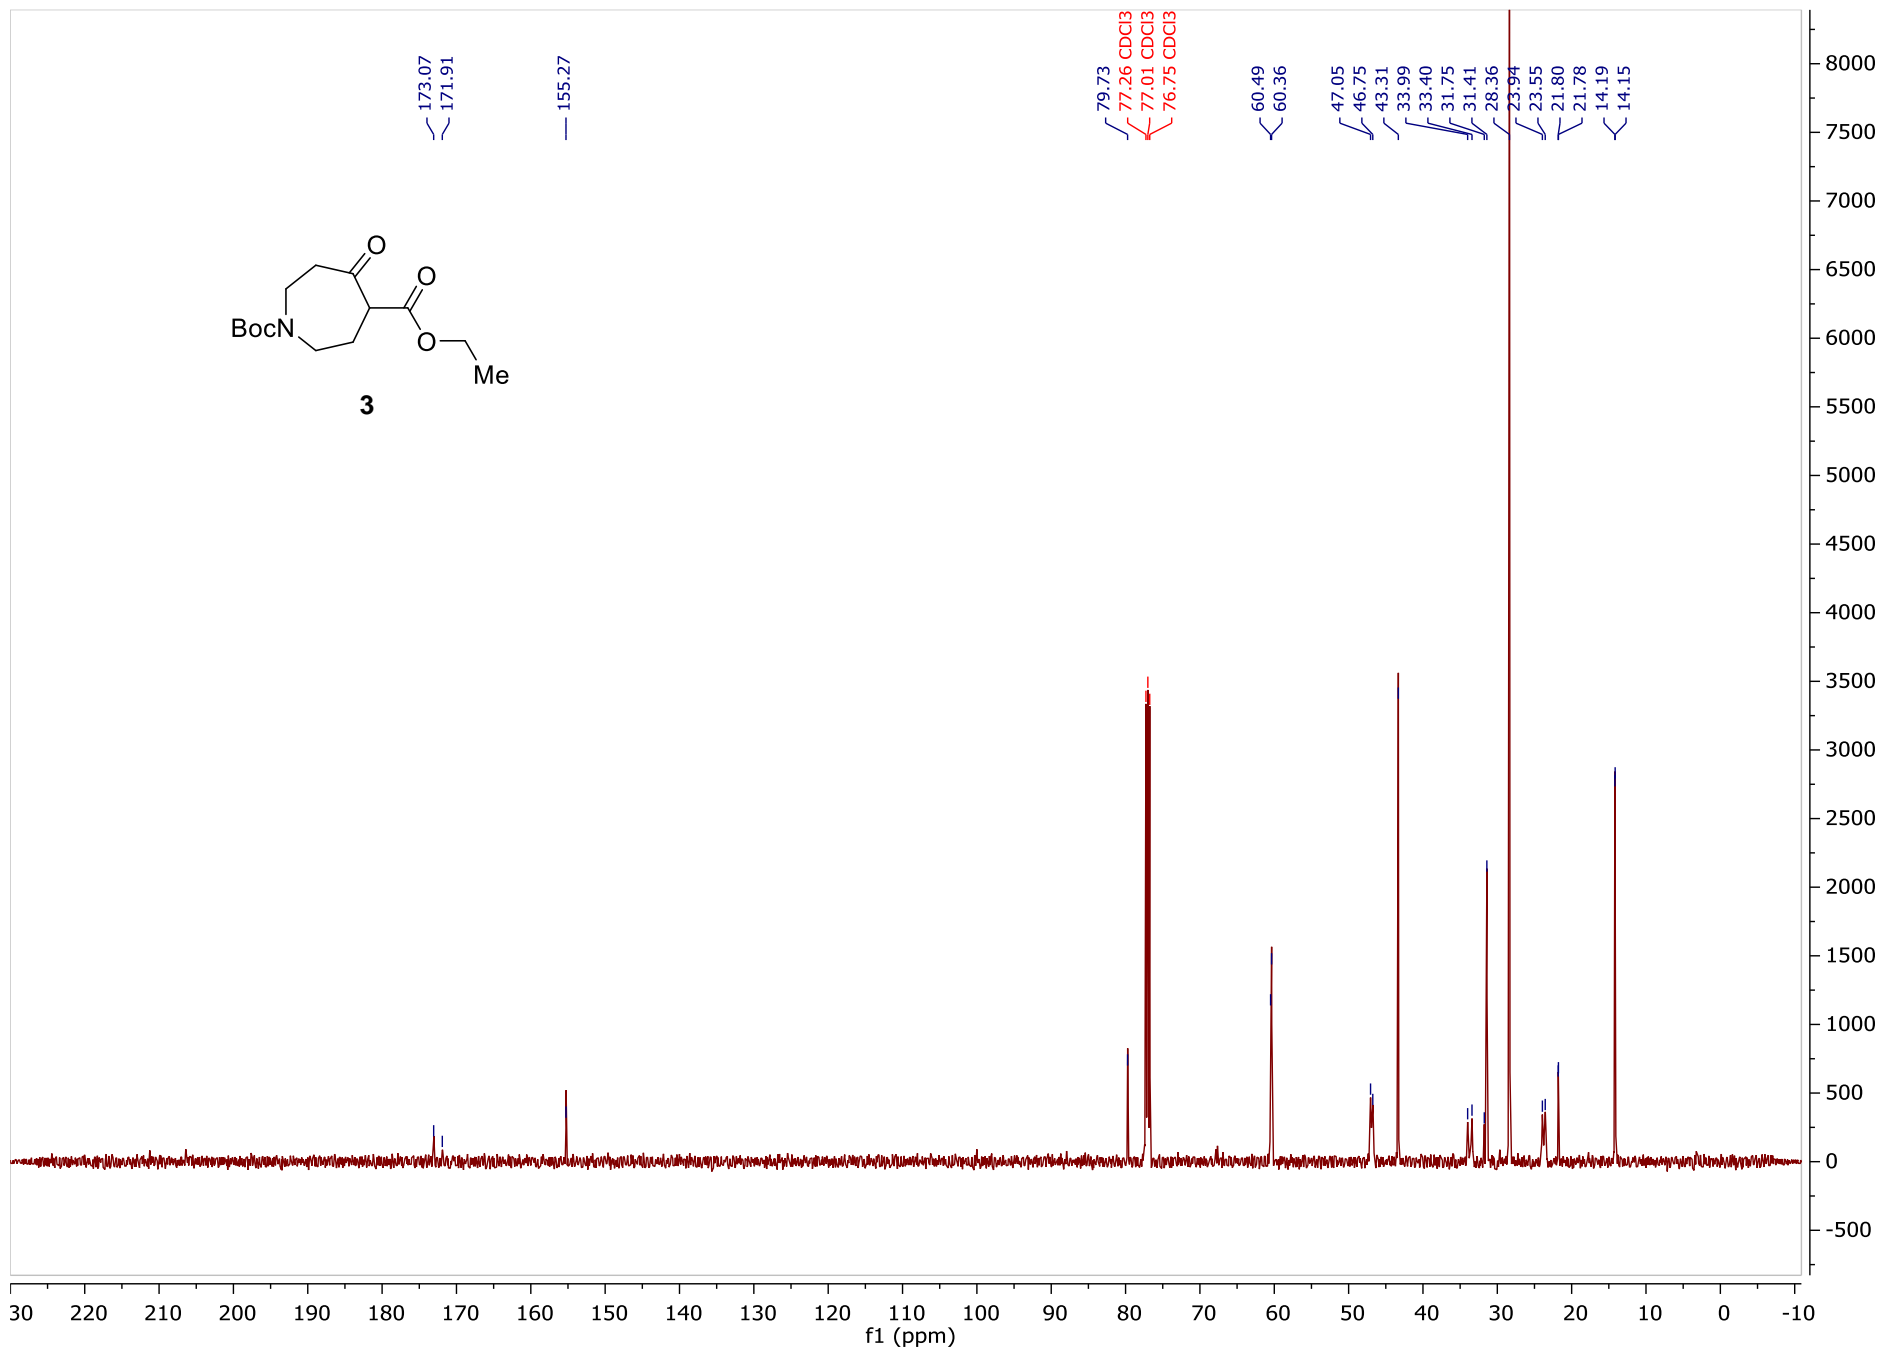

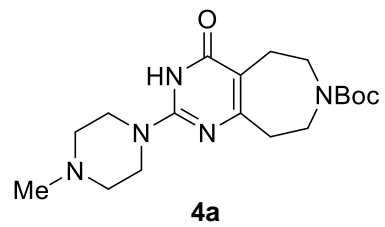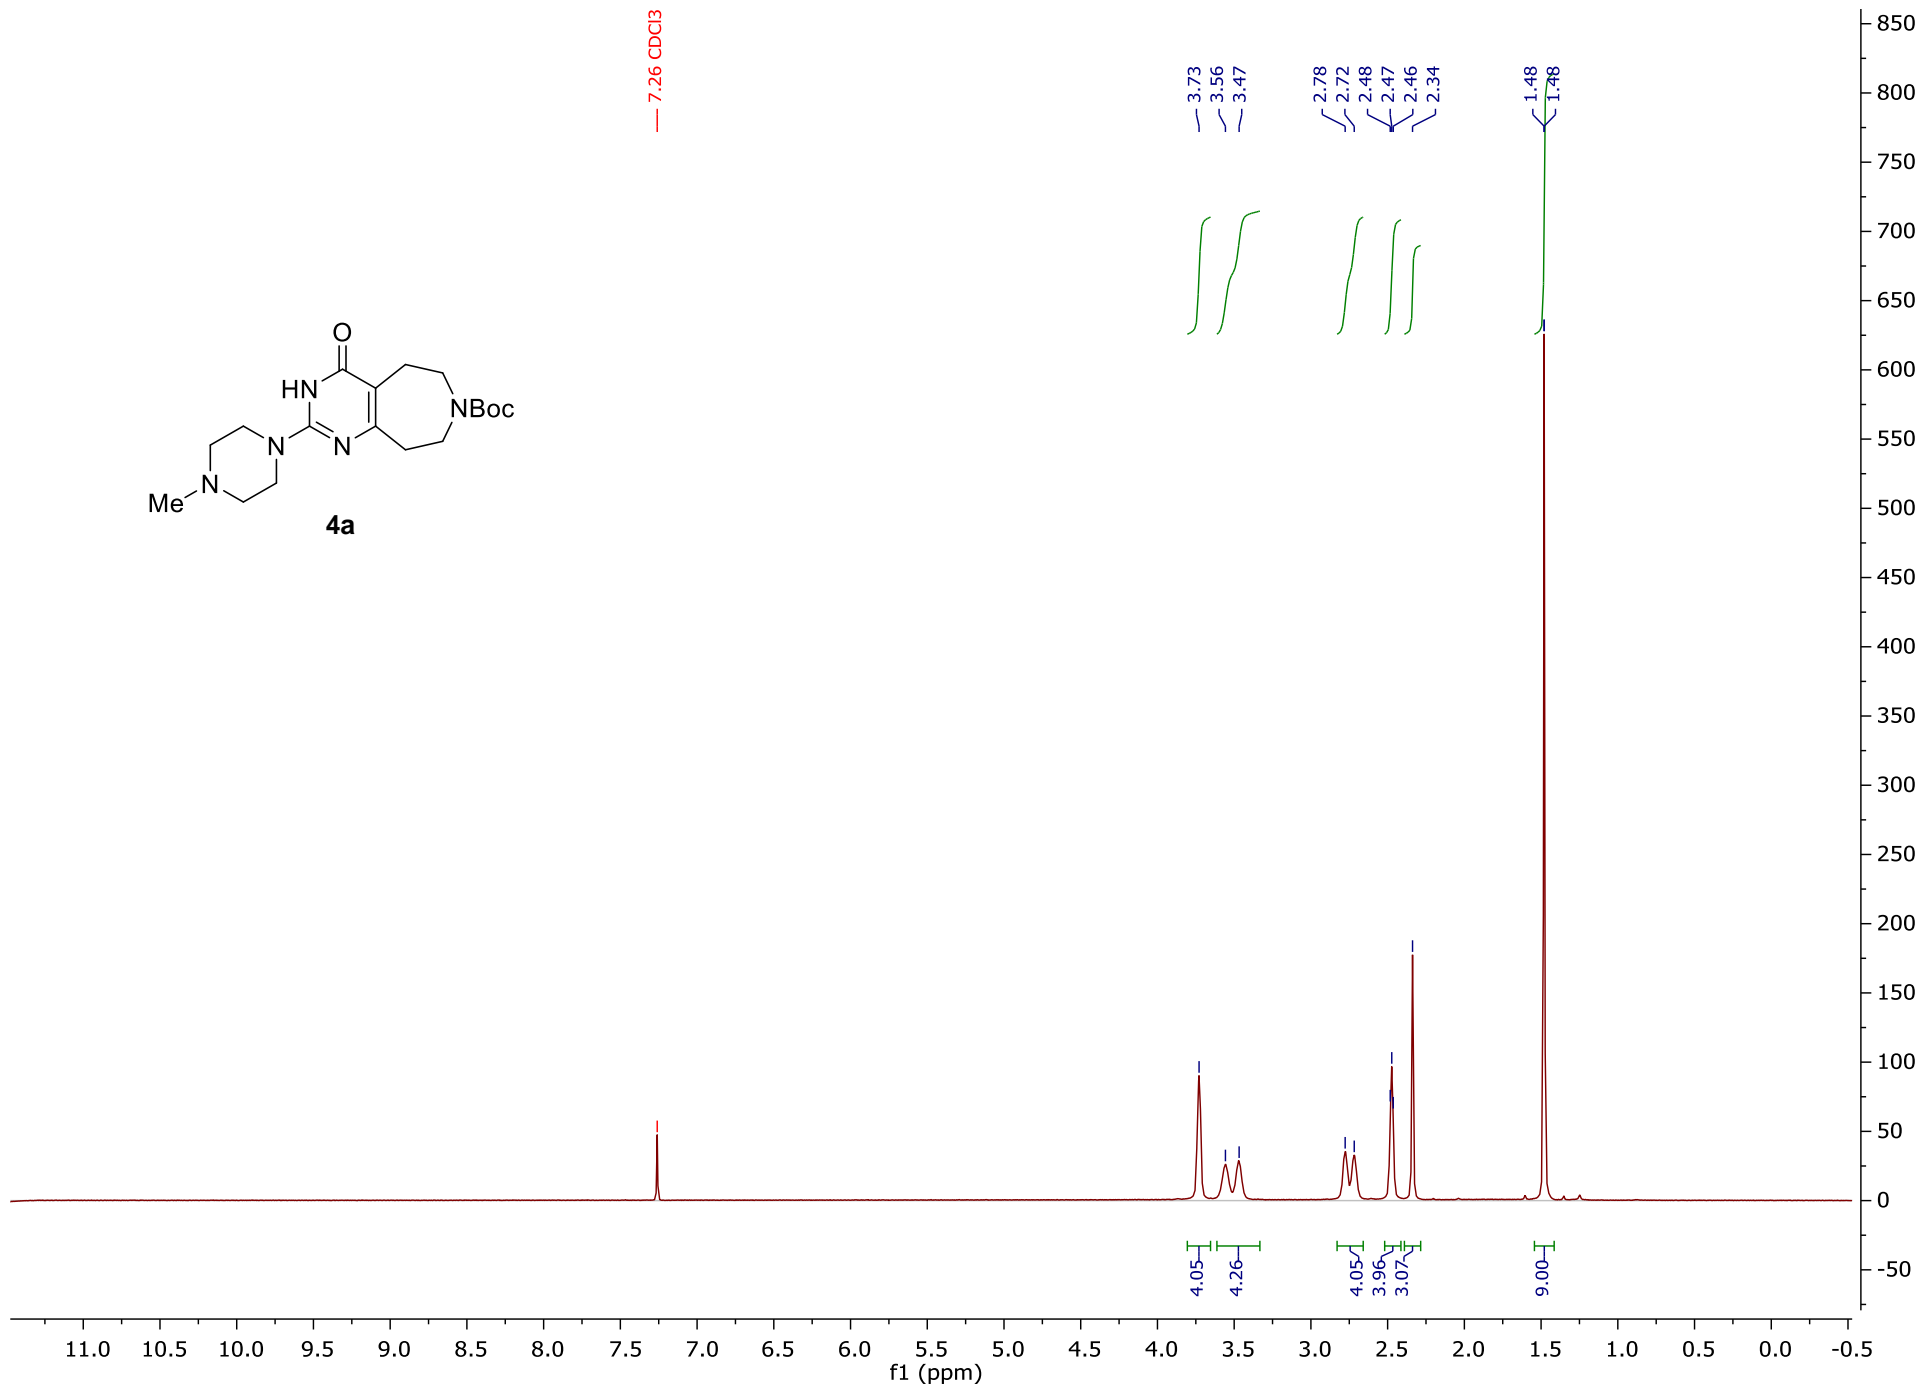

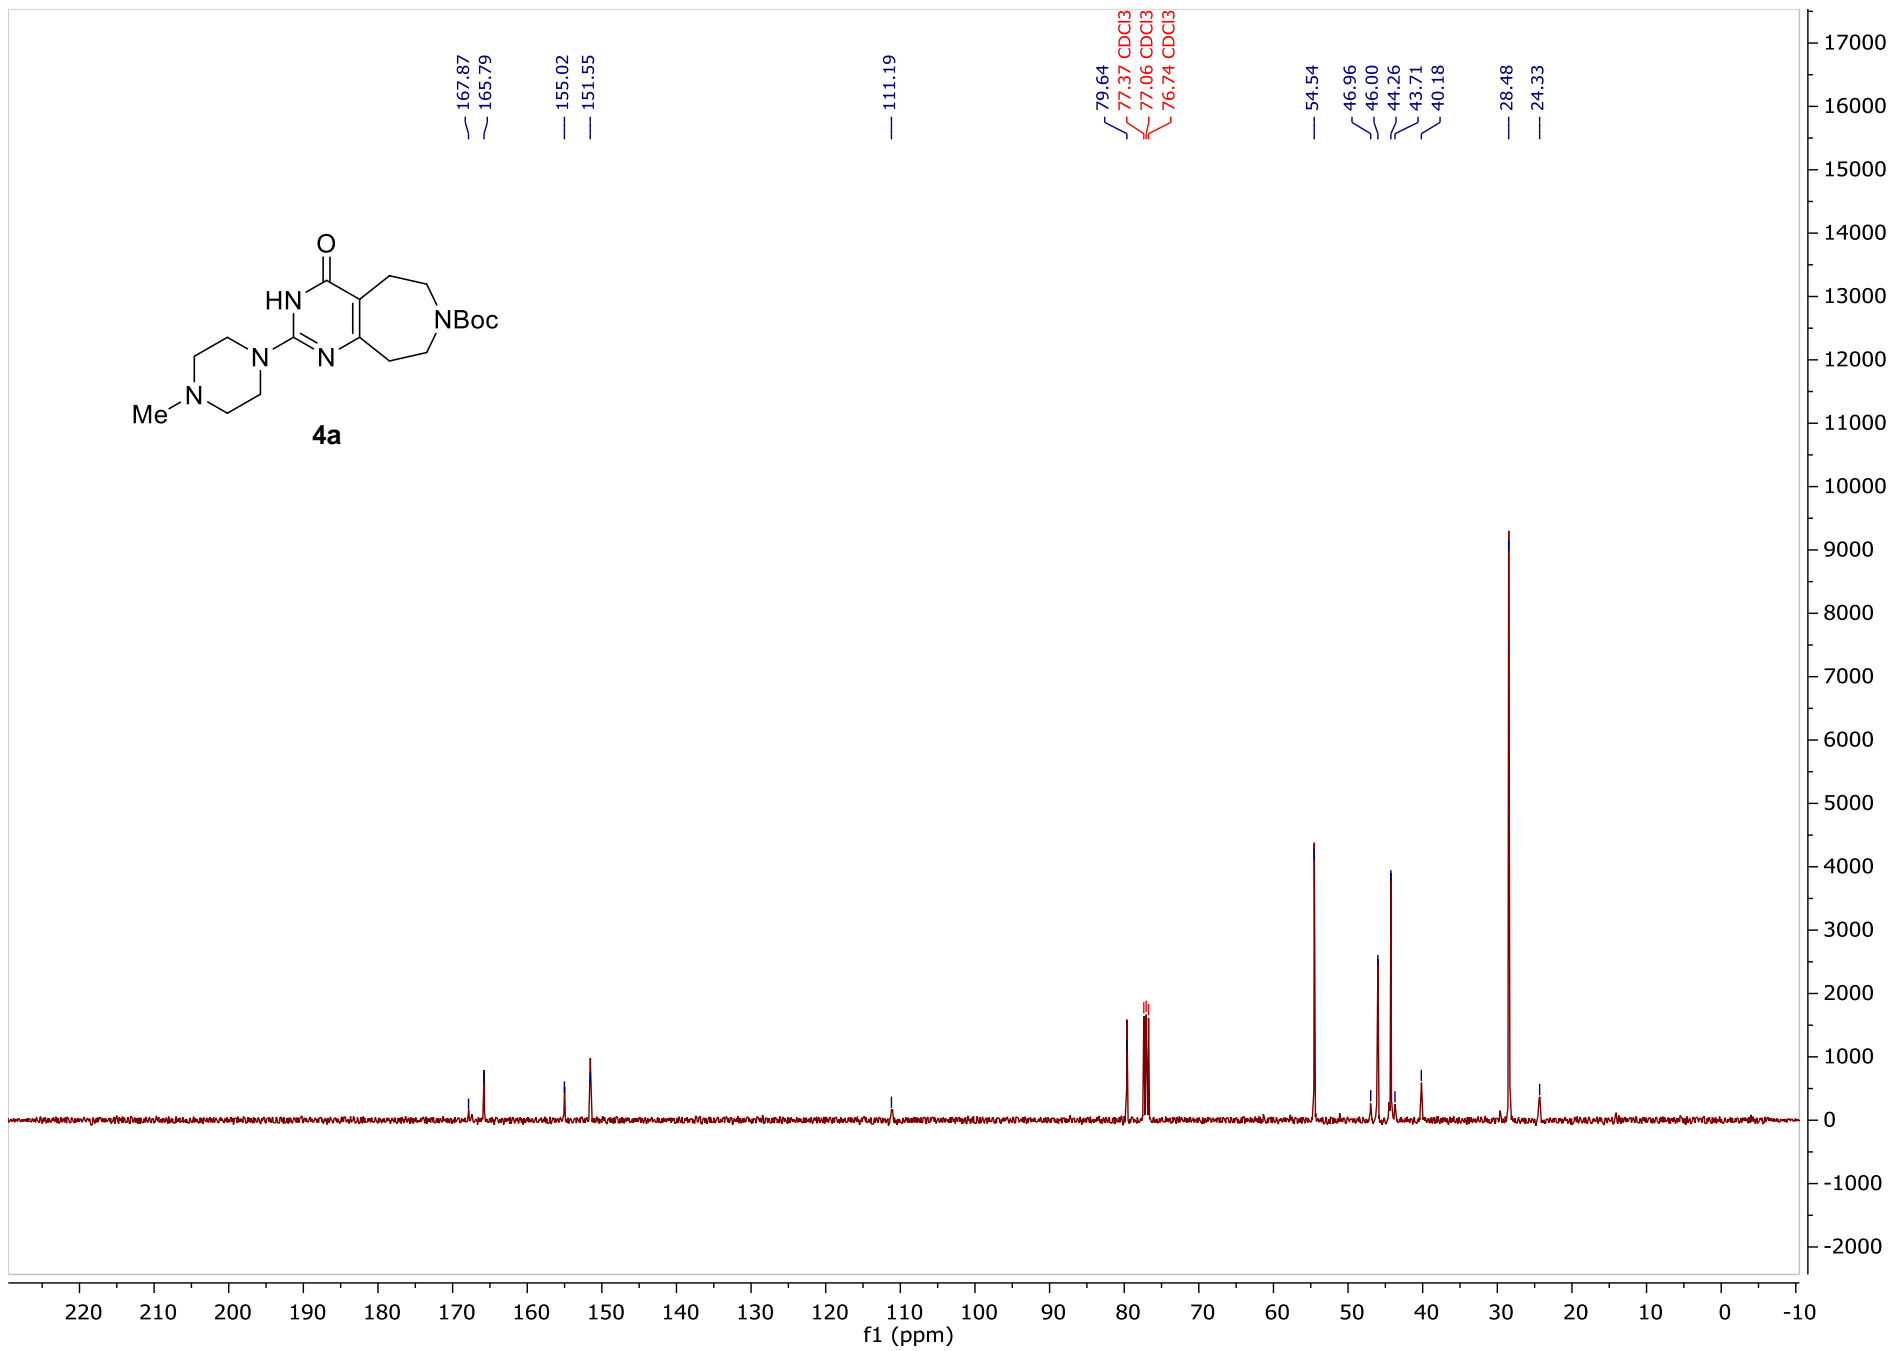

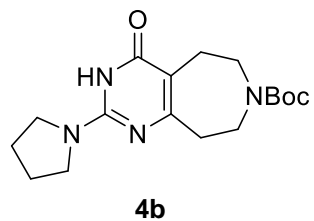

— 7.26 CDCl<sub>3</sub>

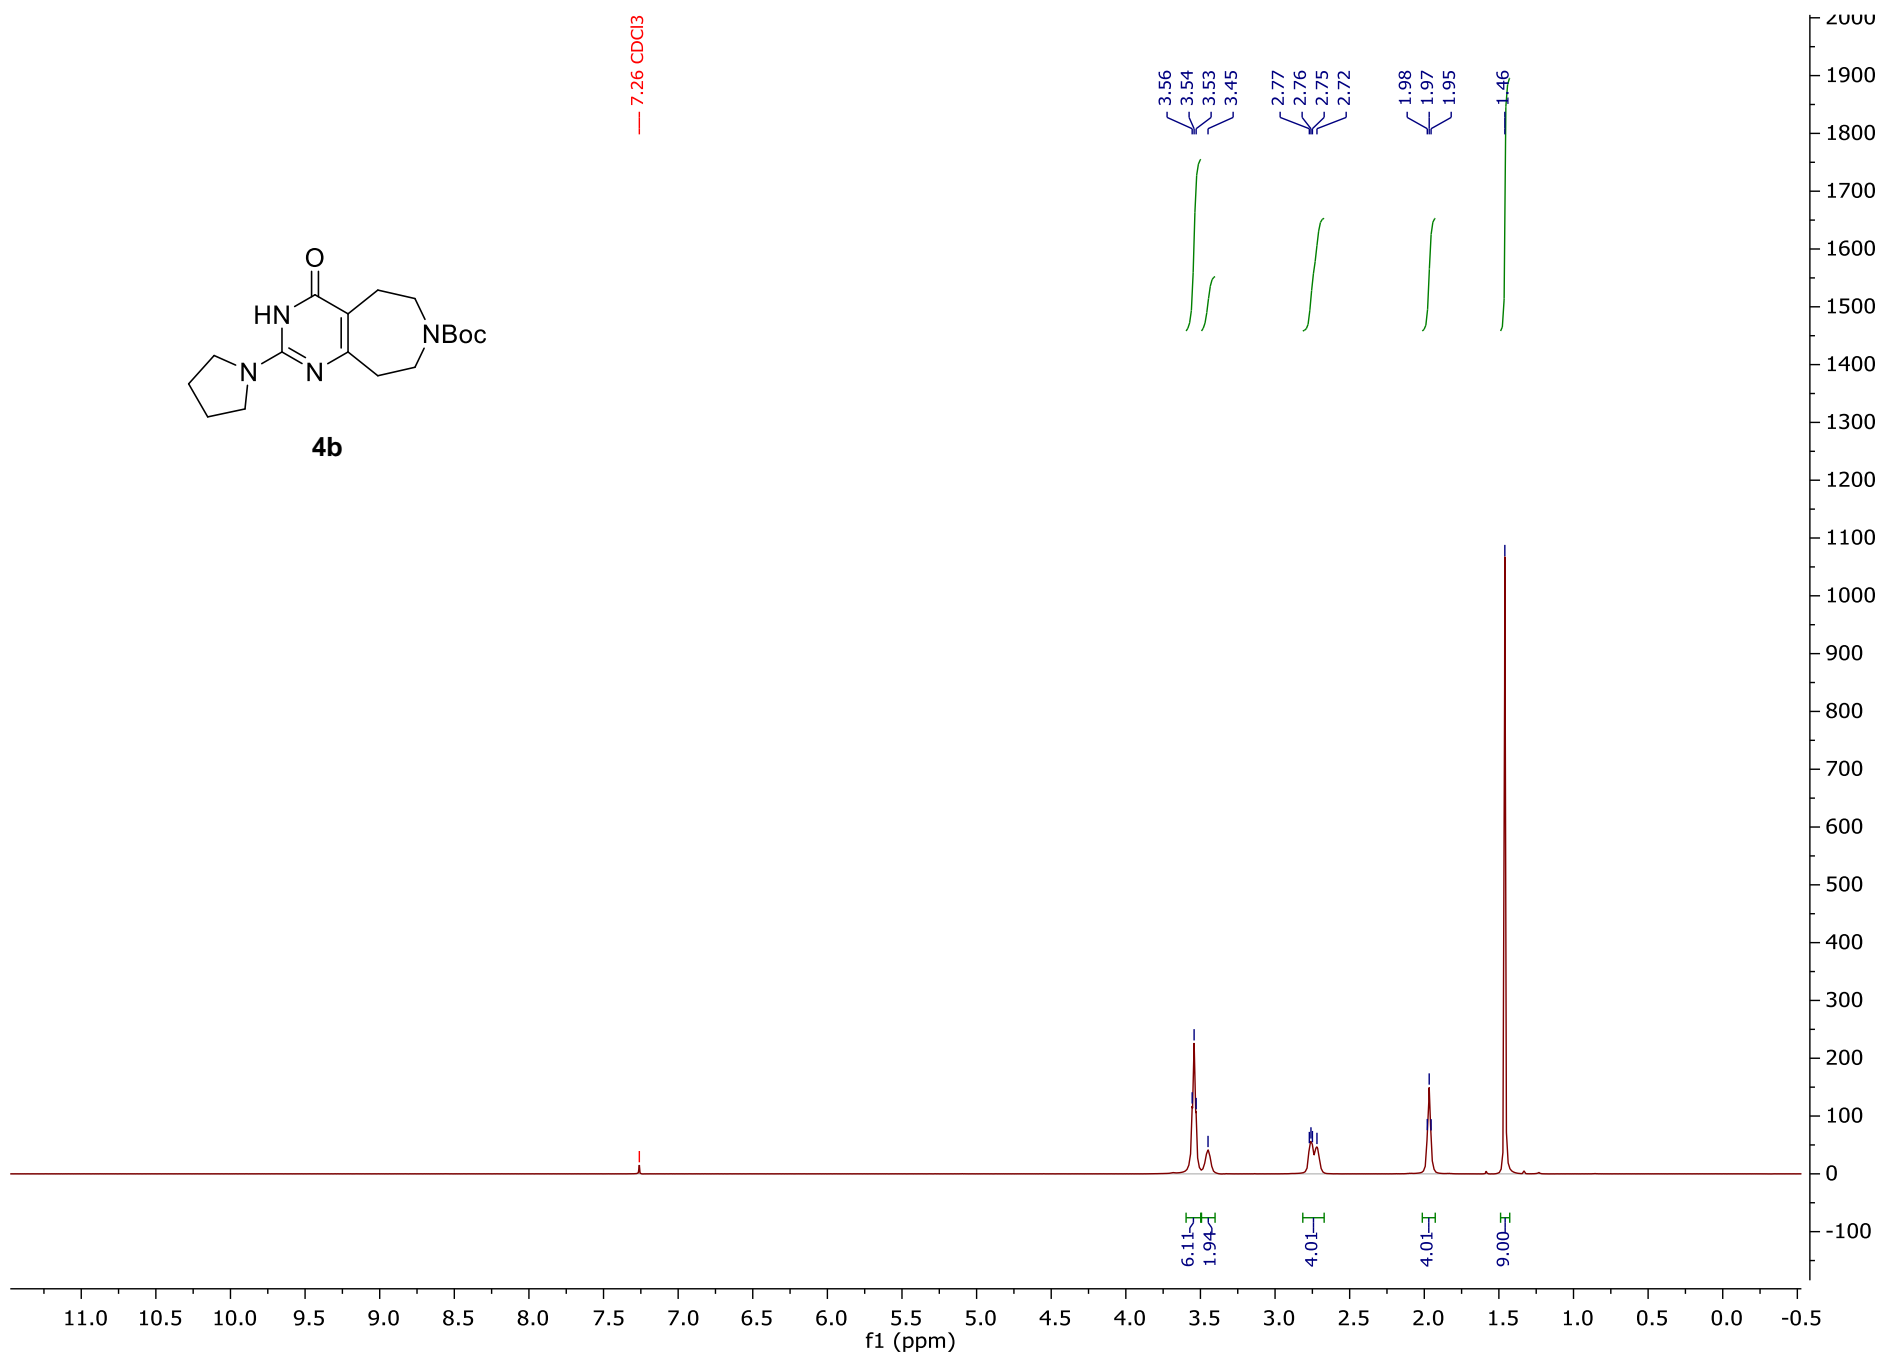

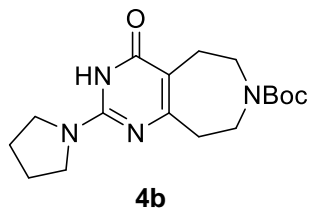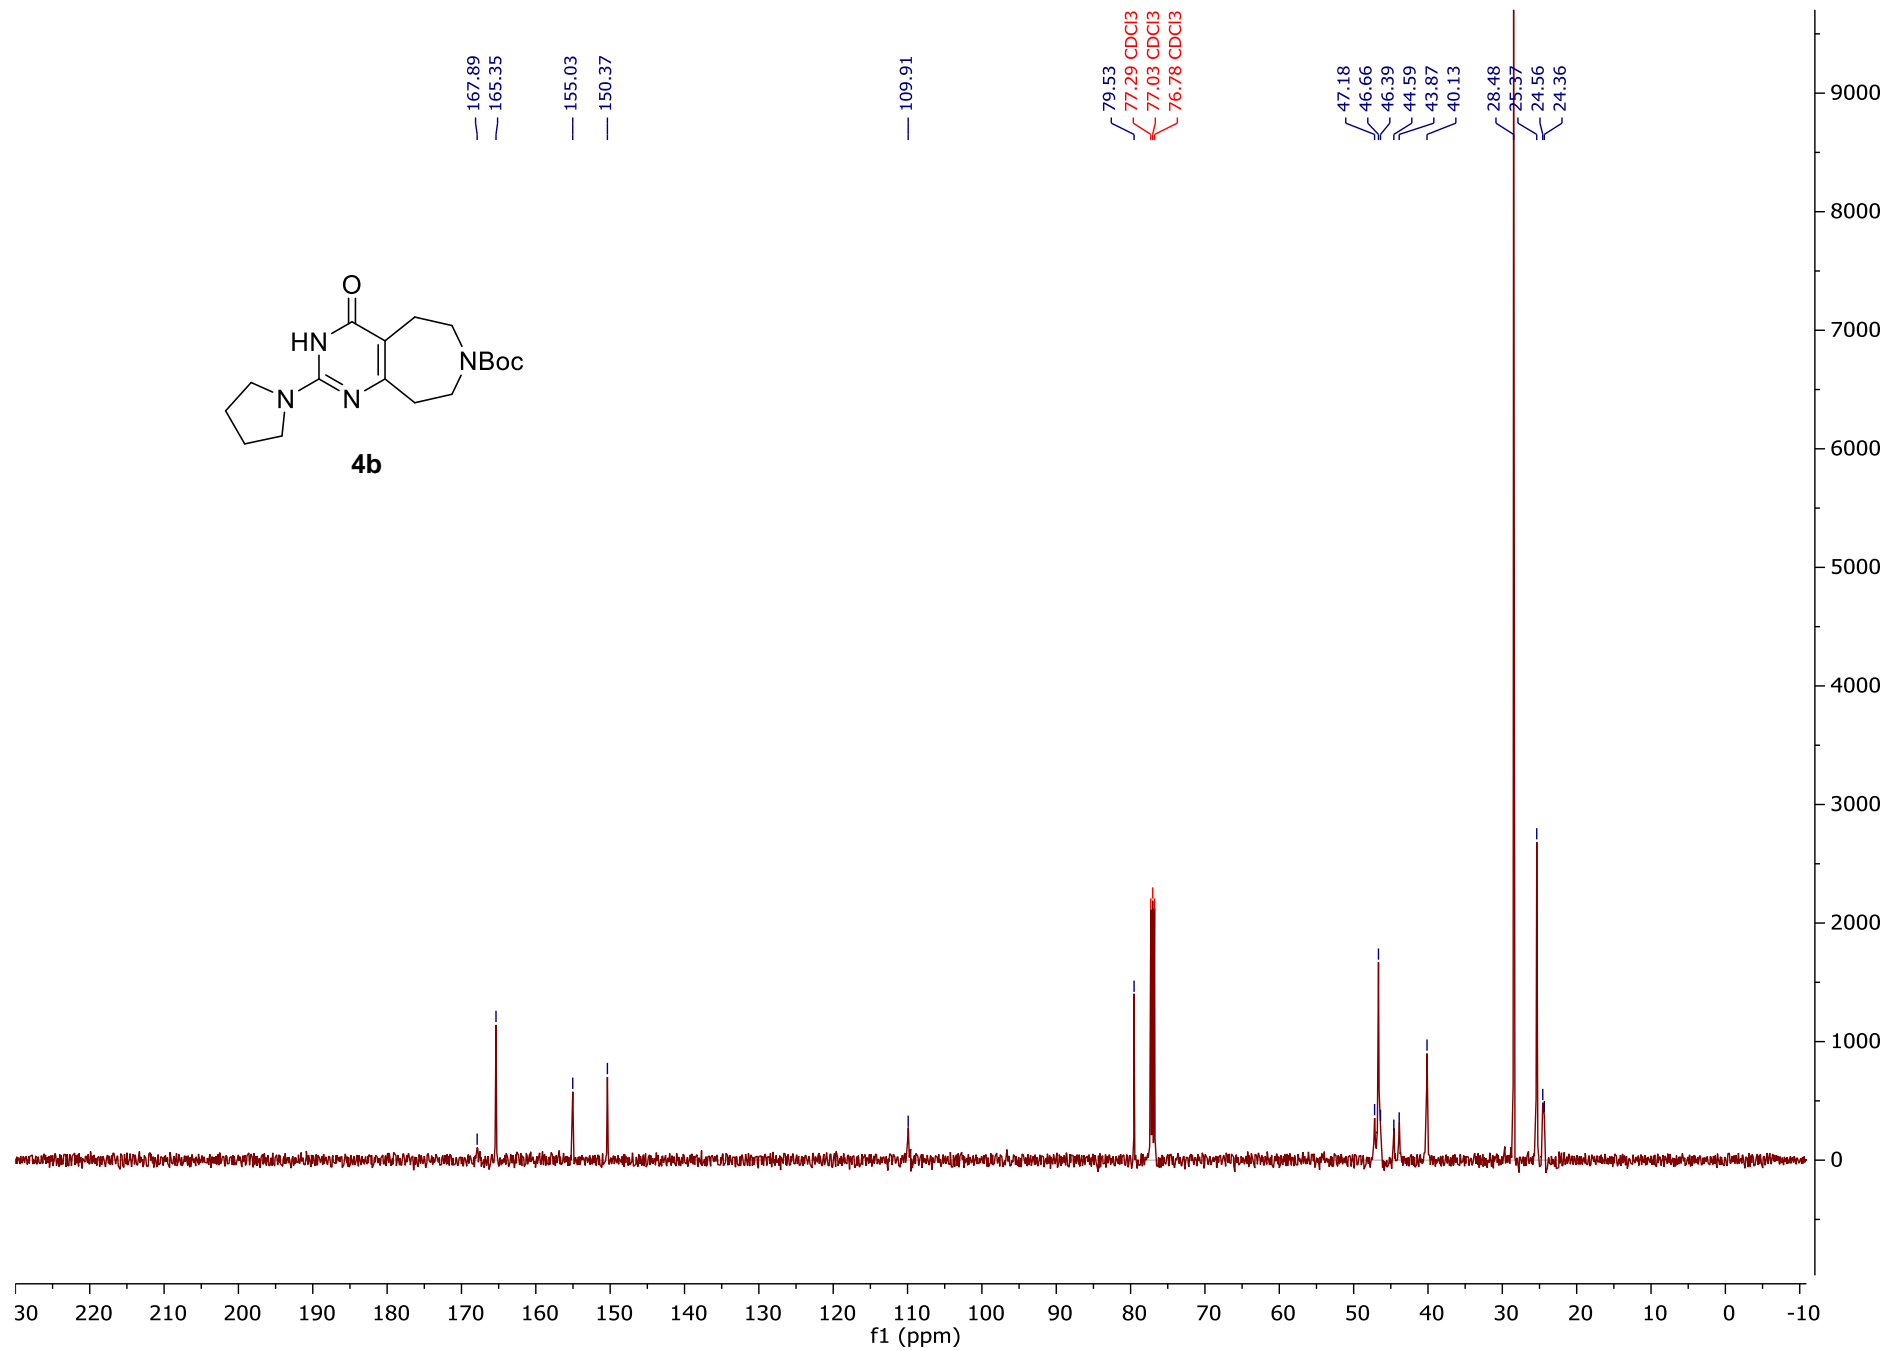

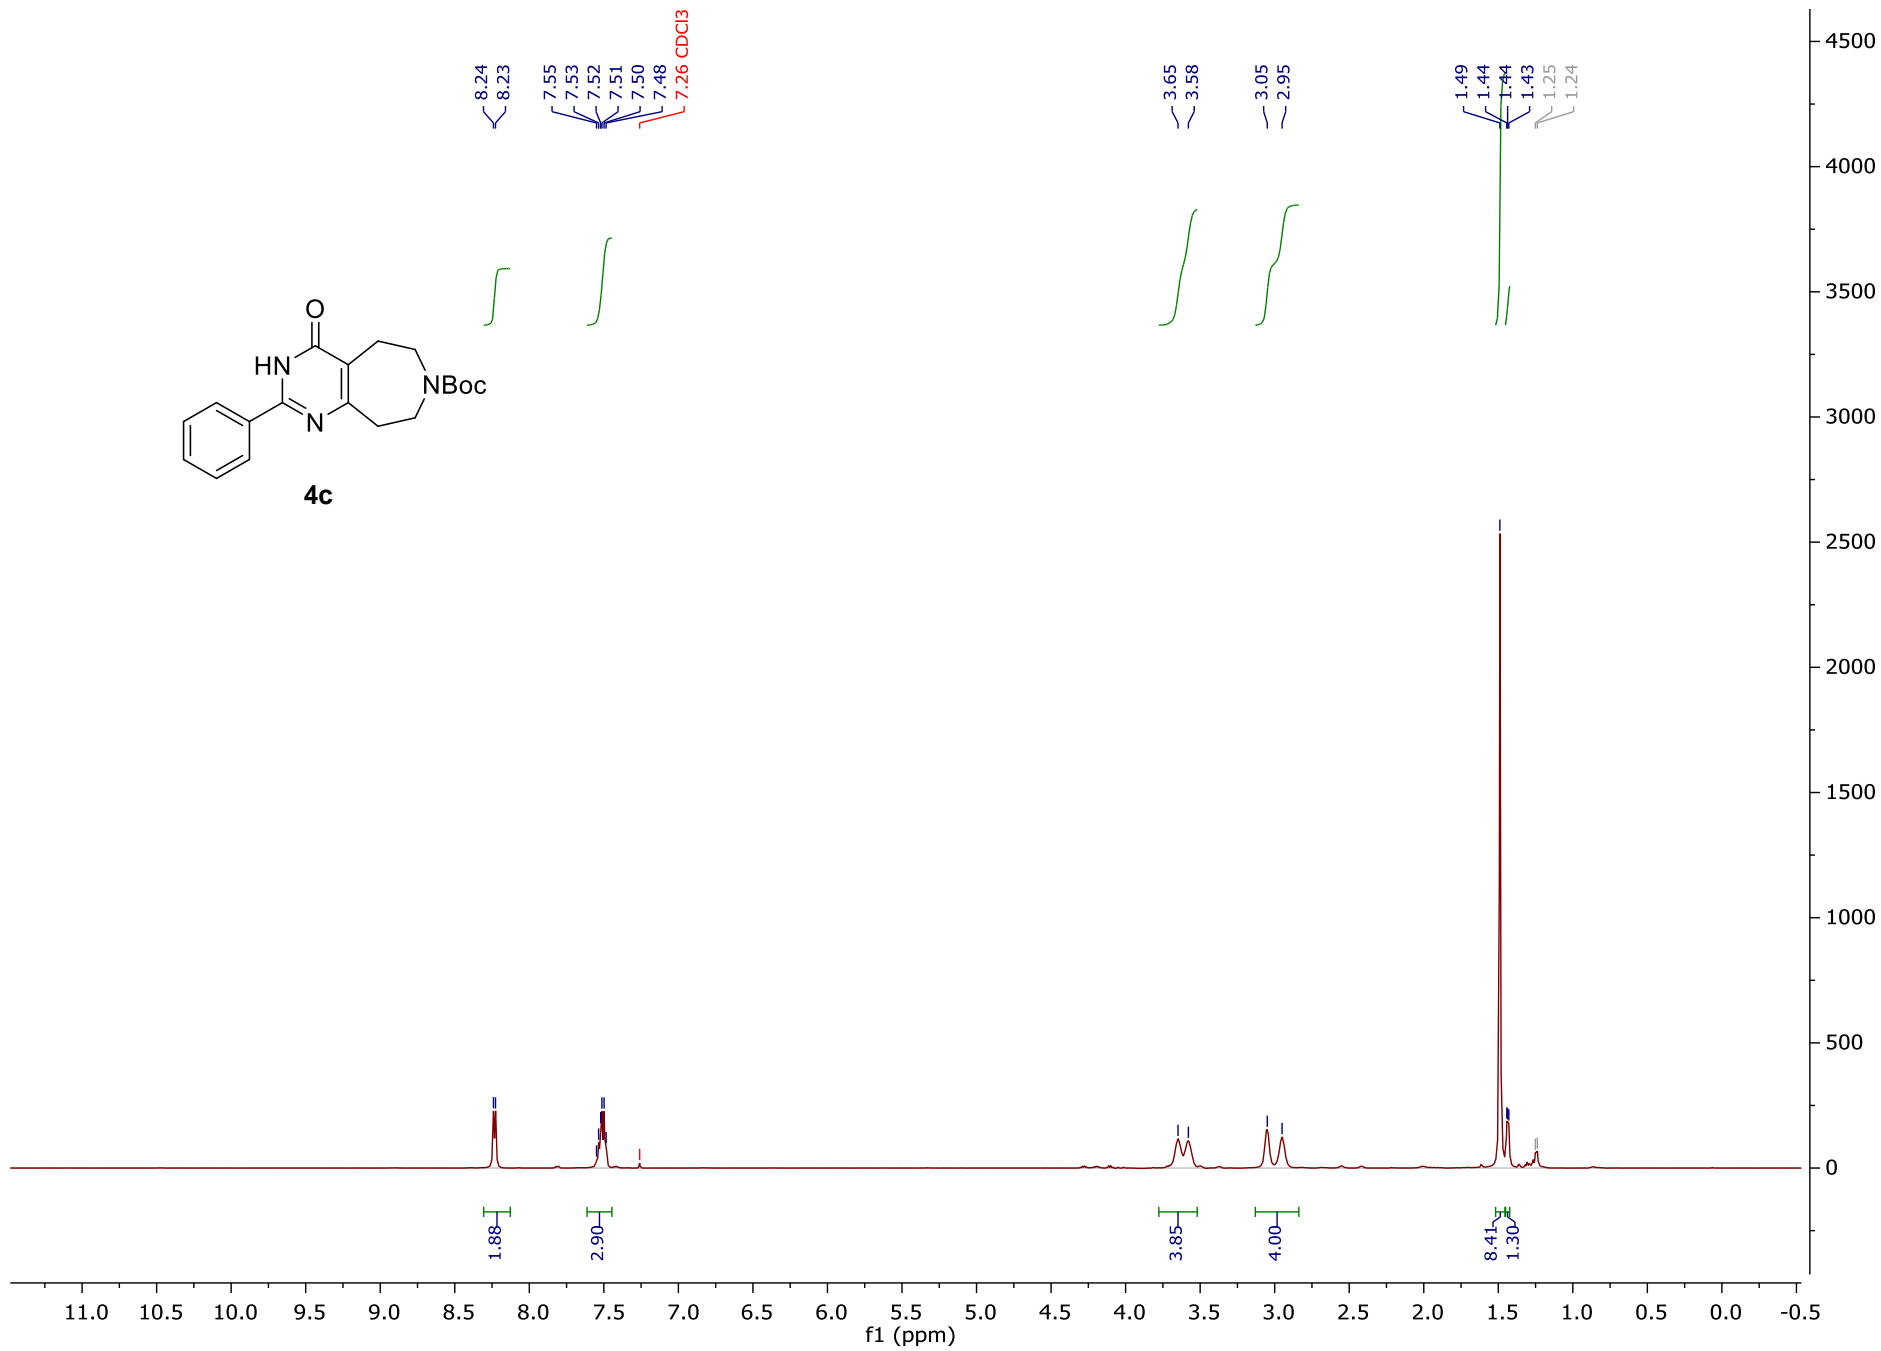

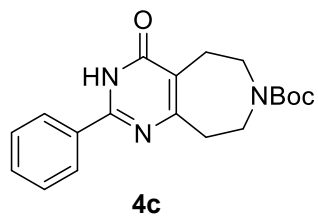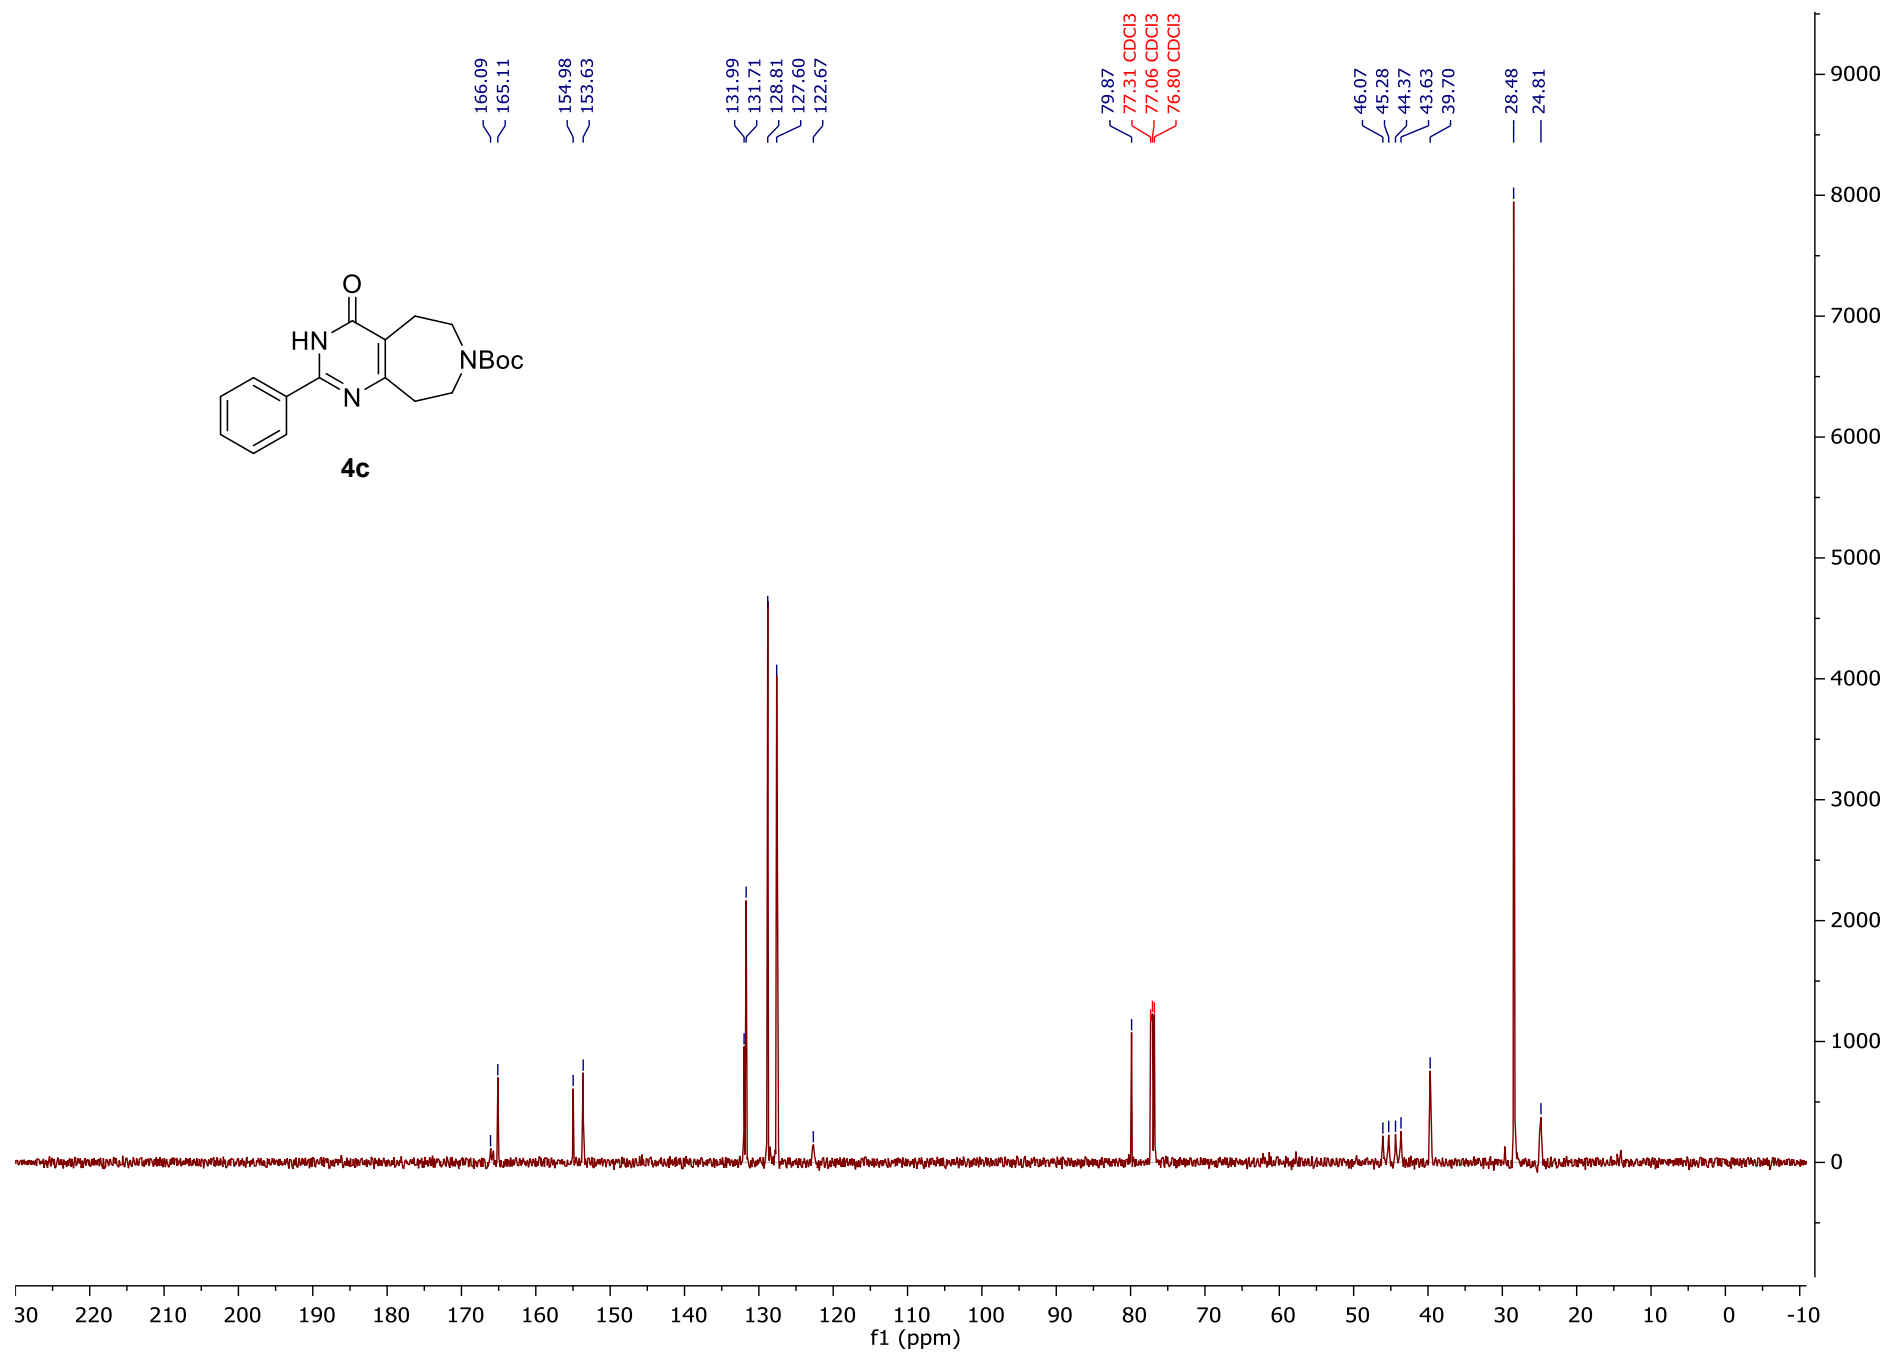



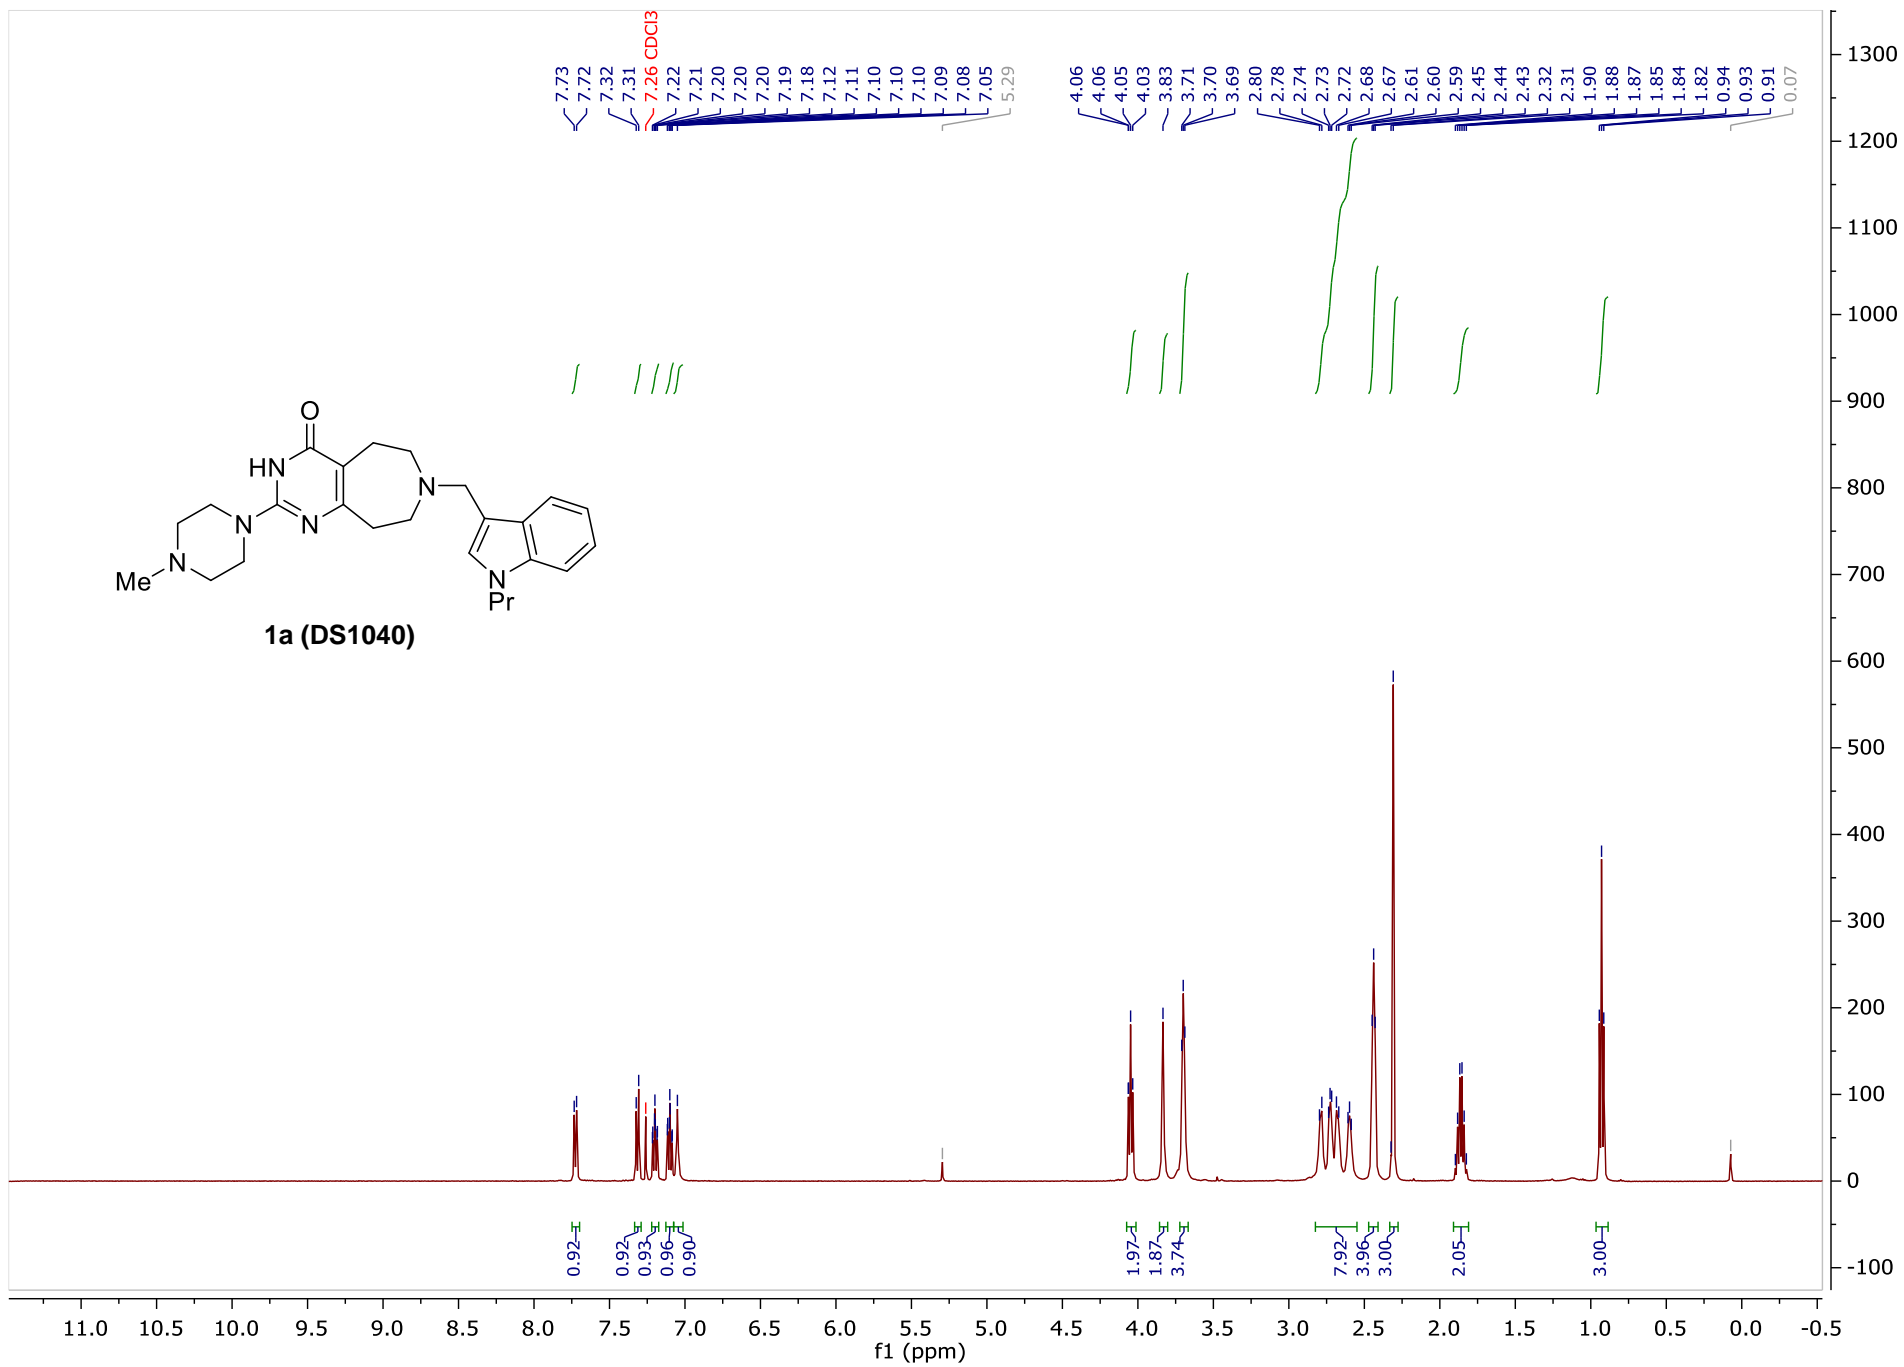

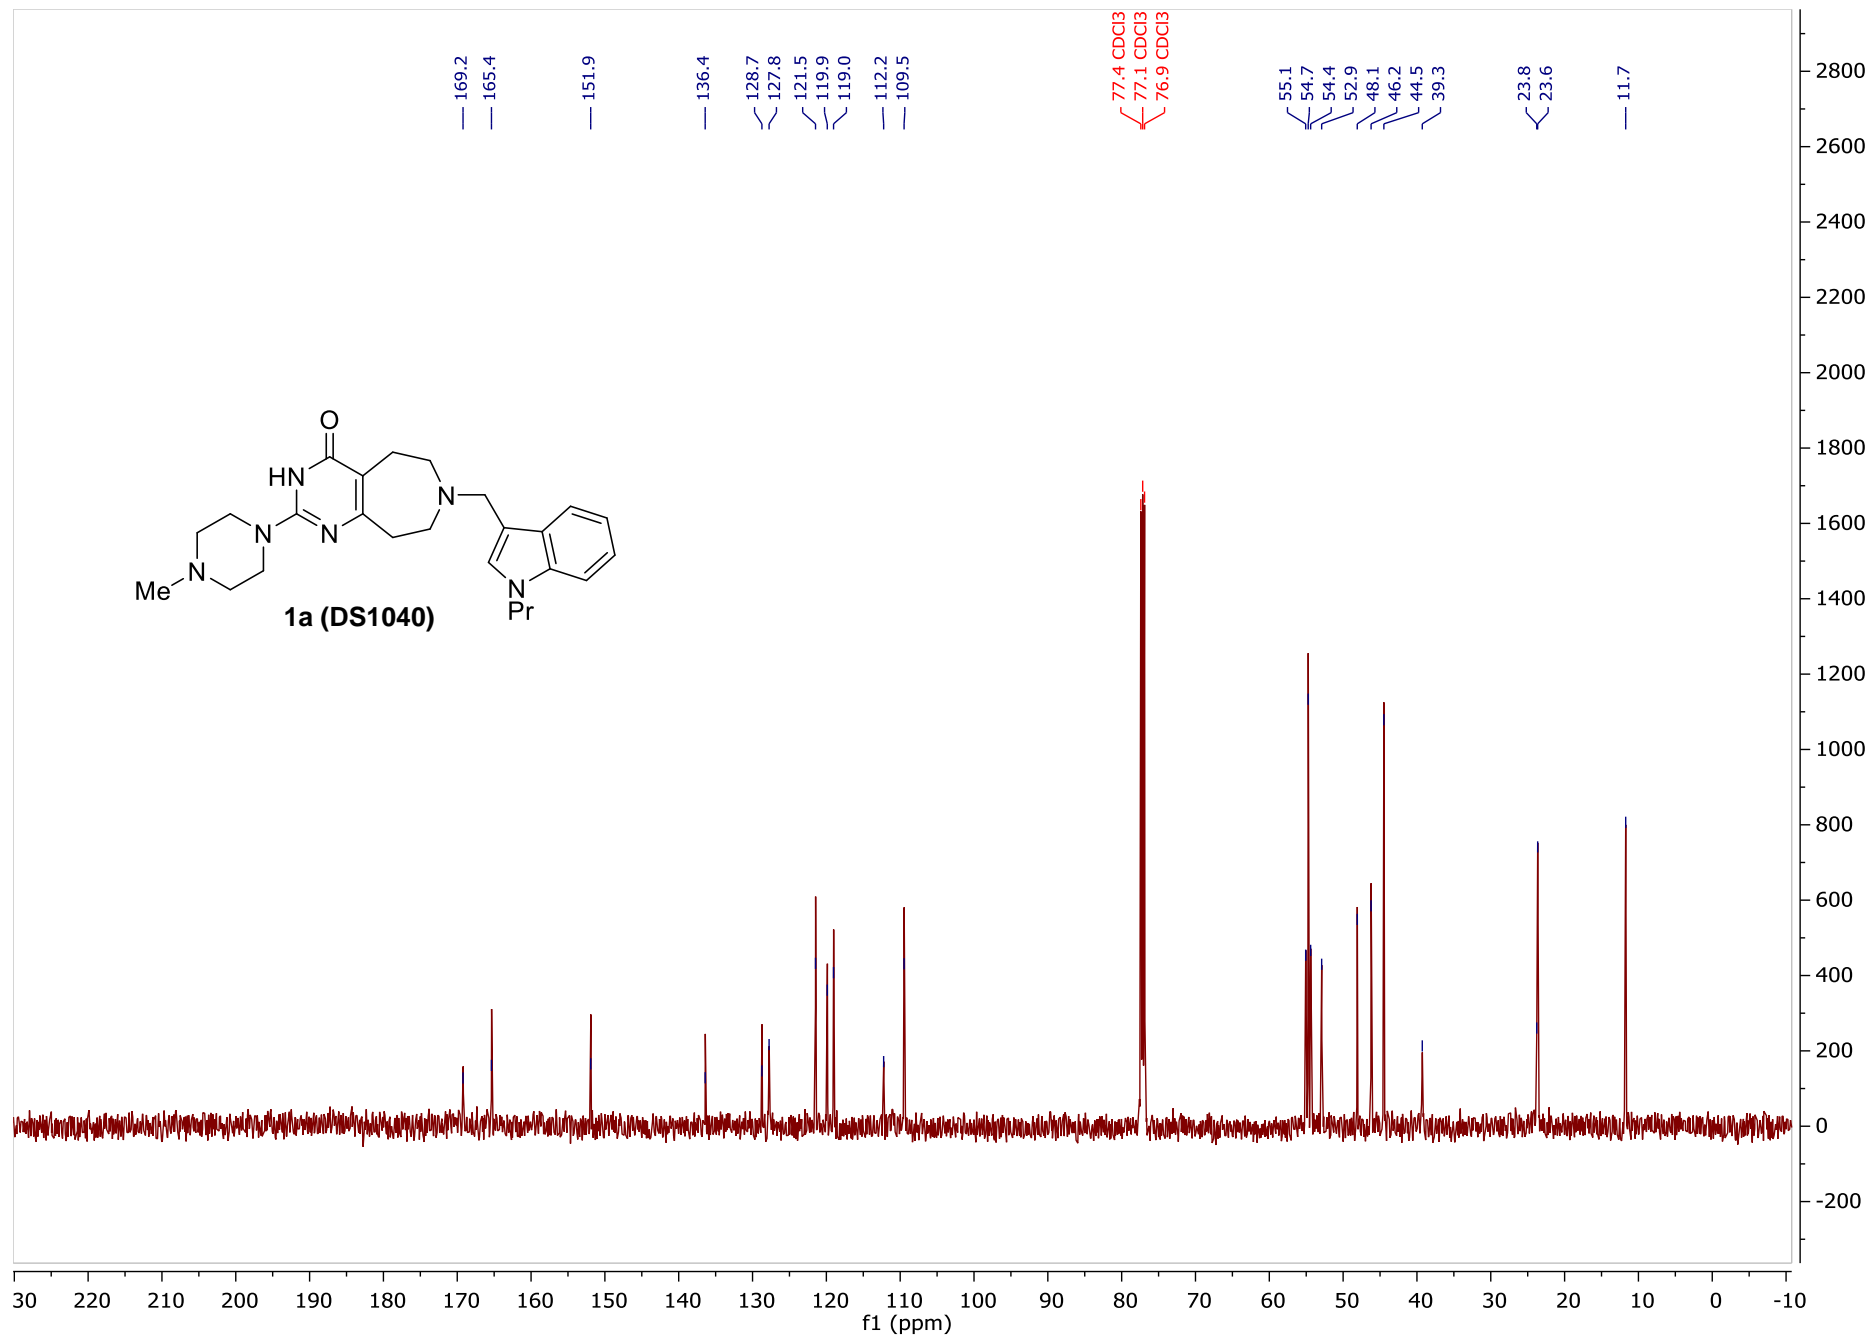

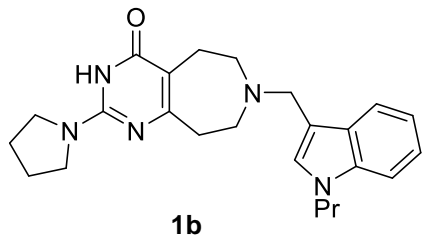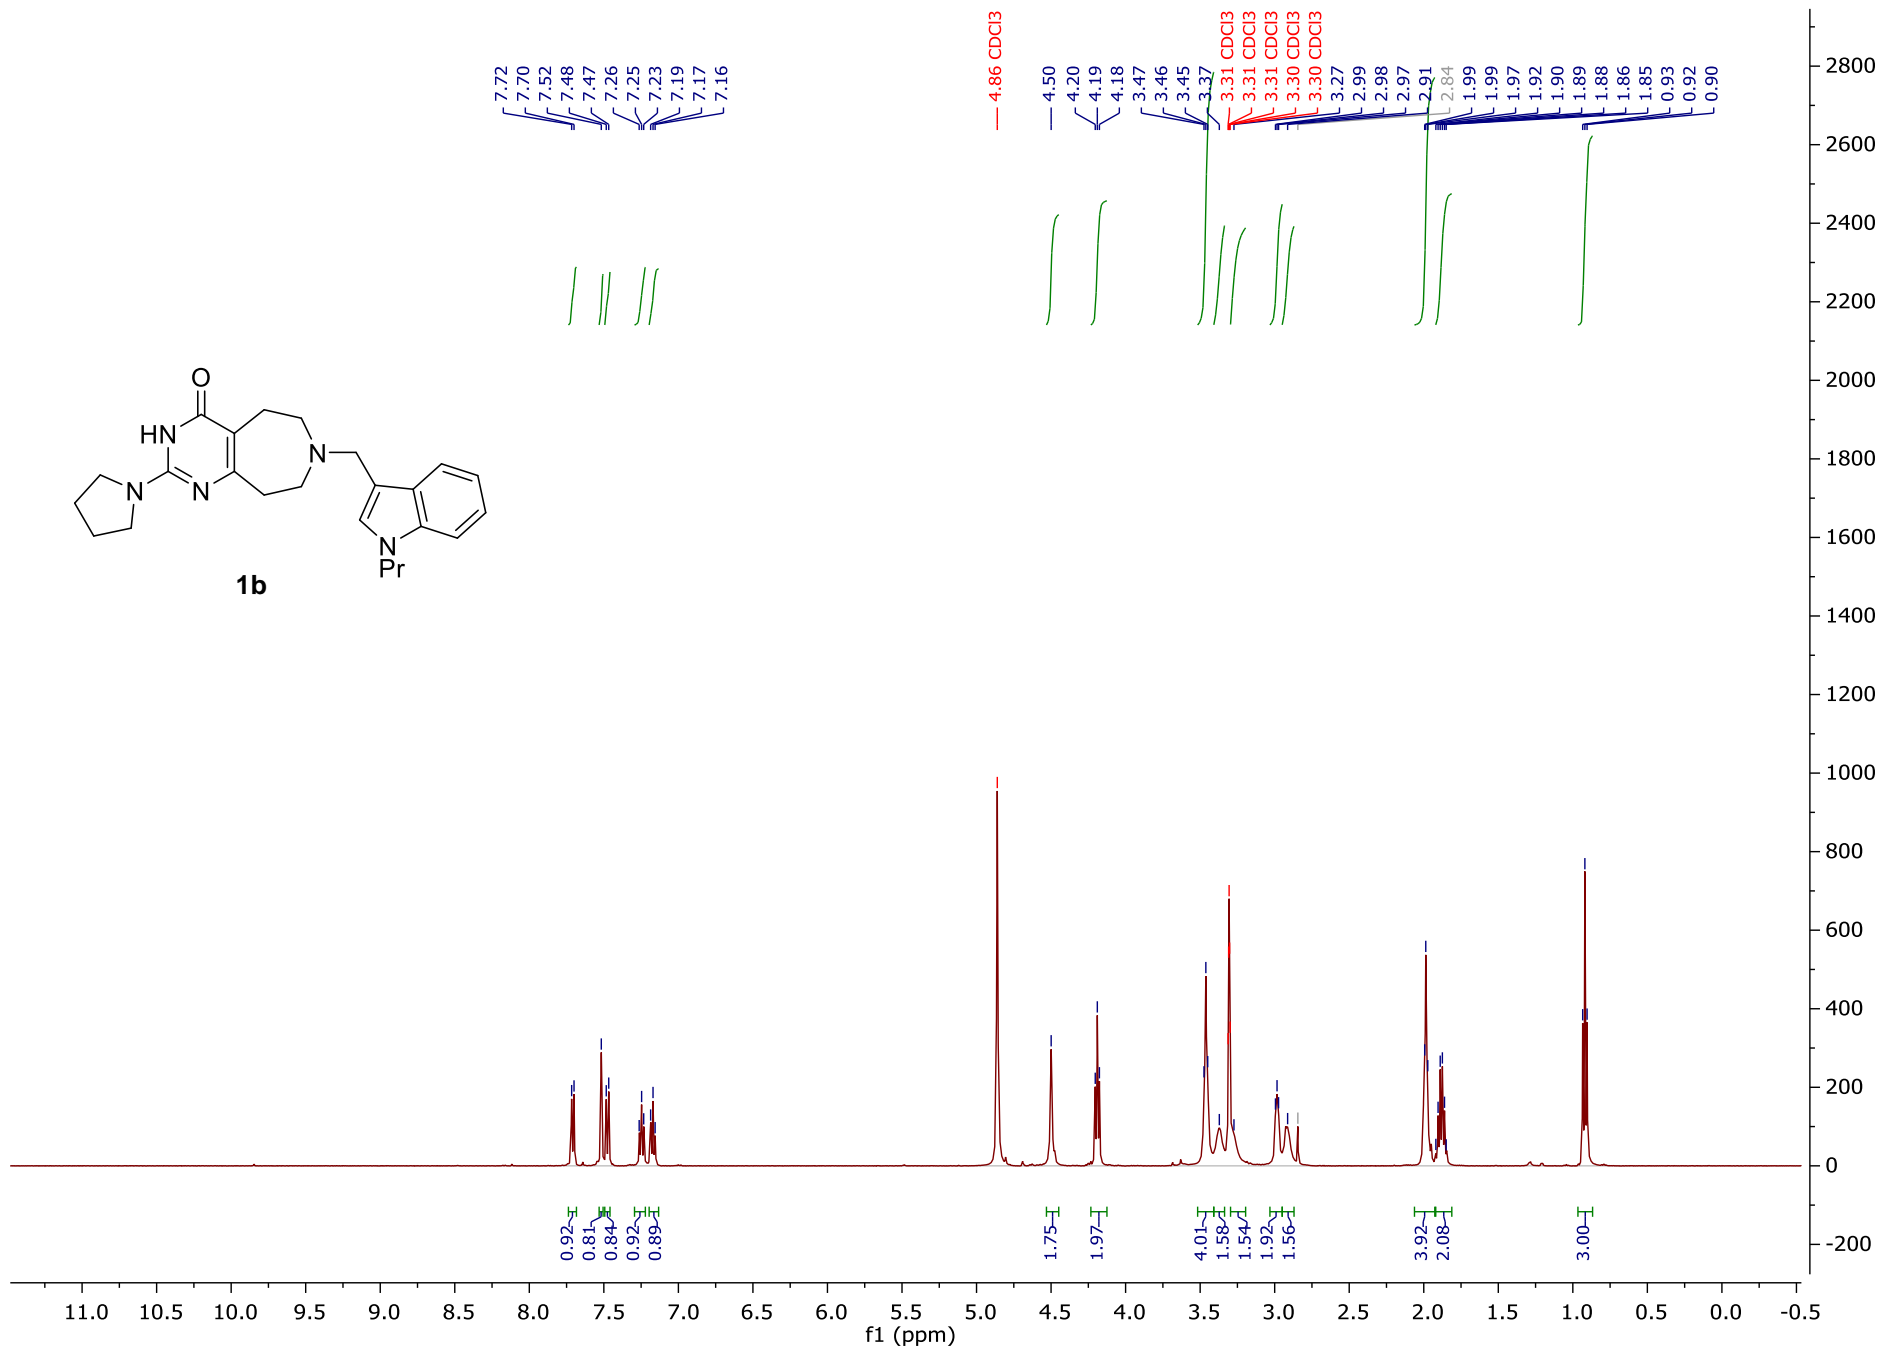

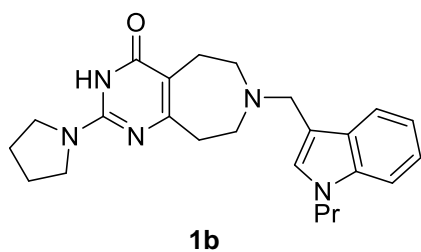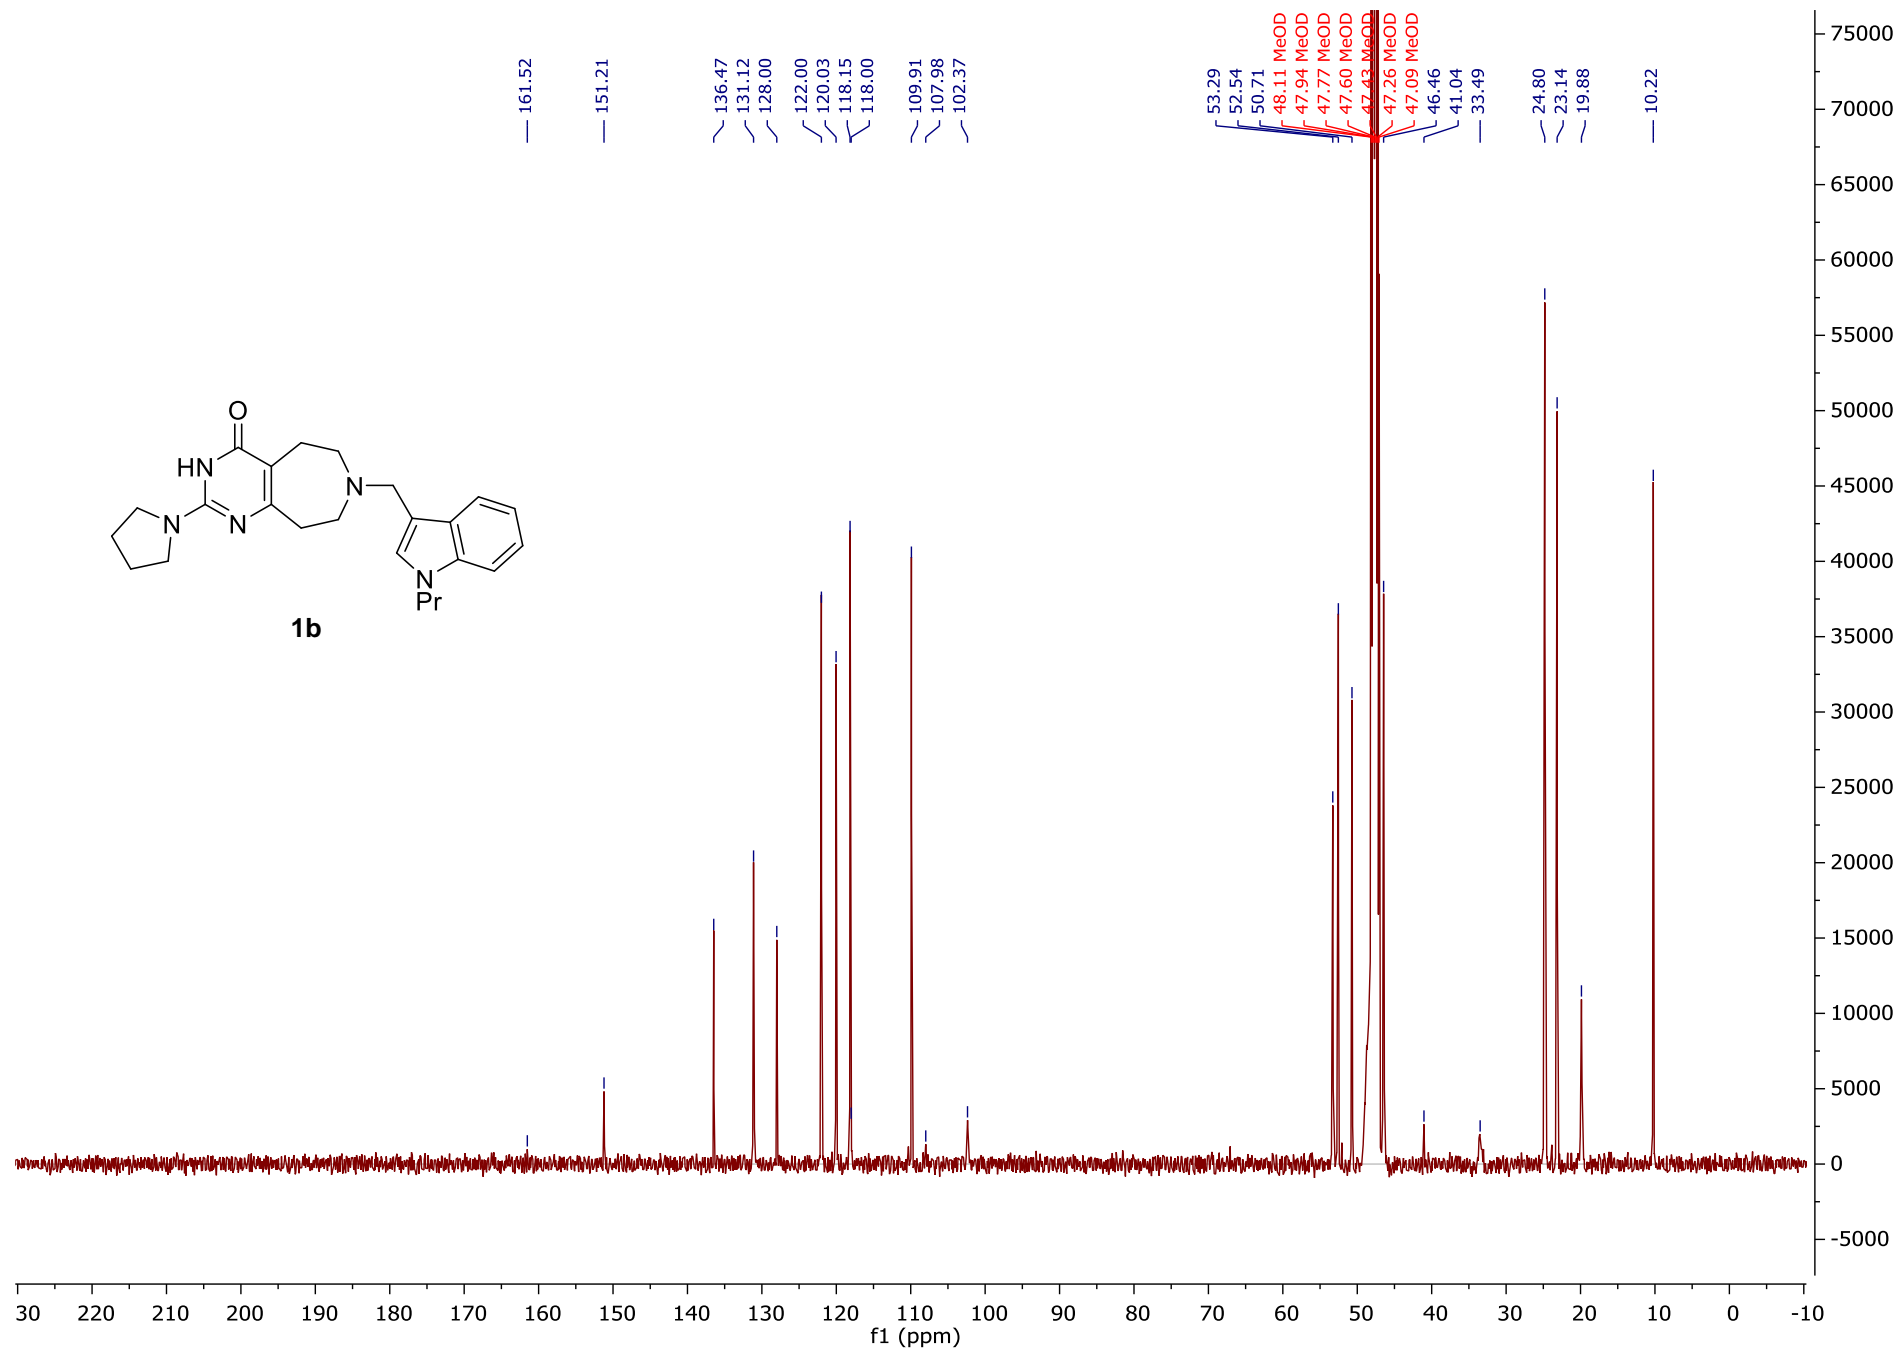

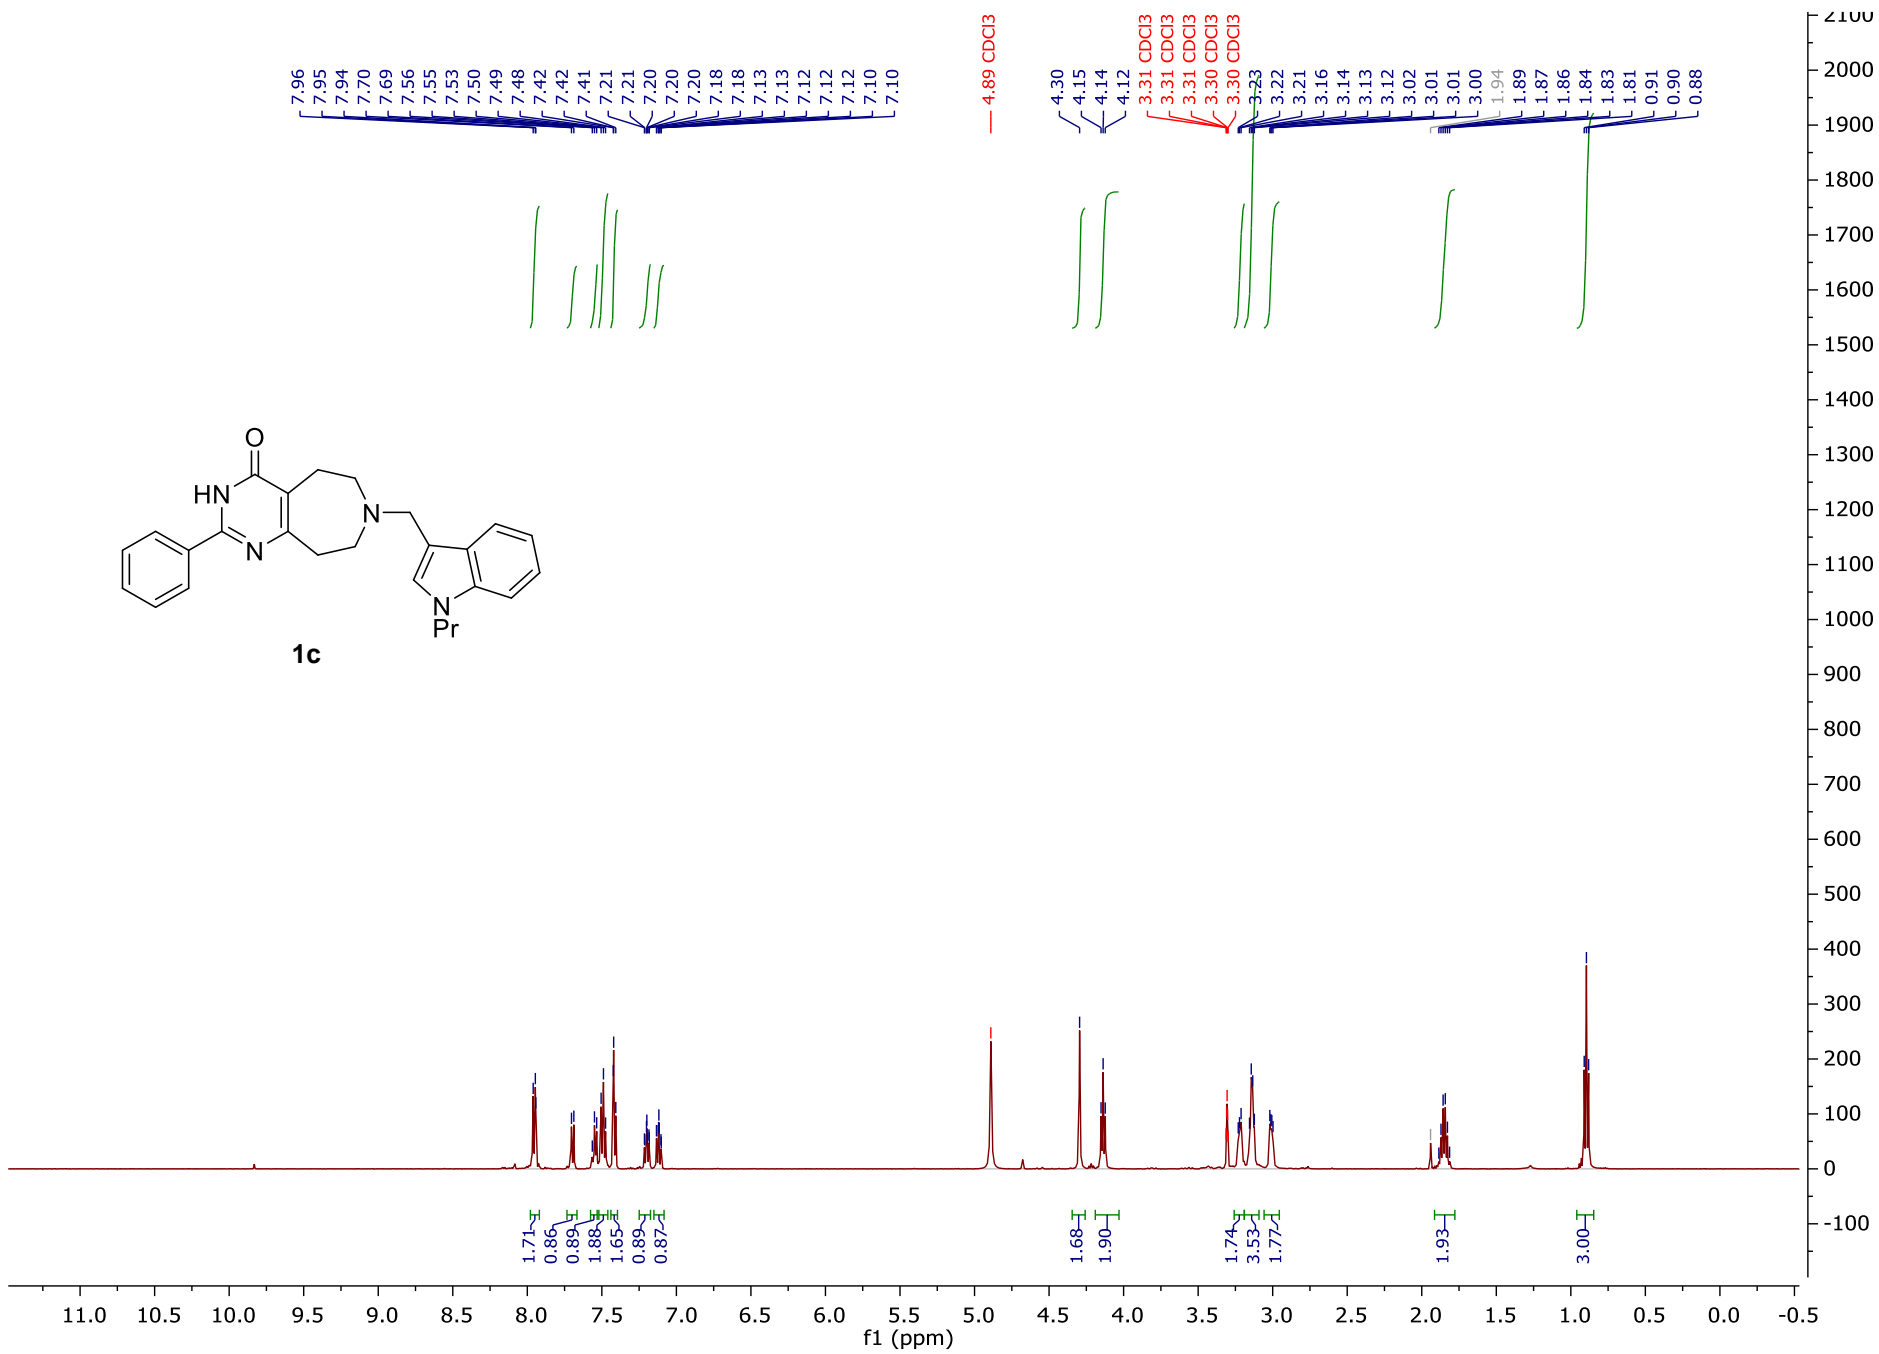

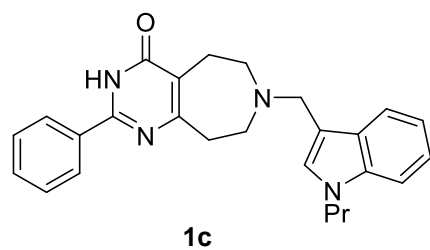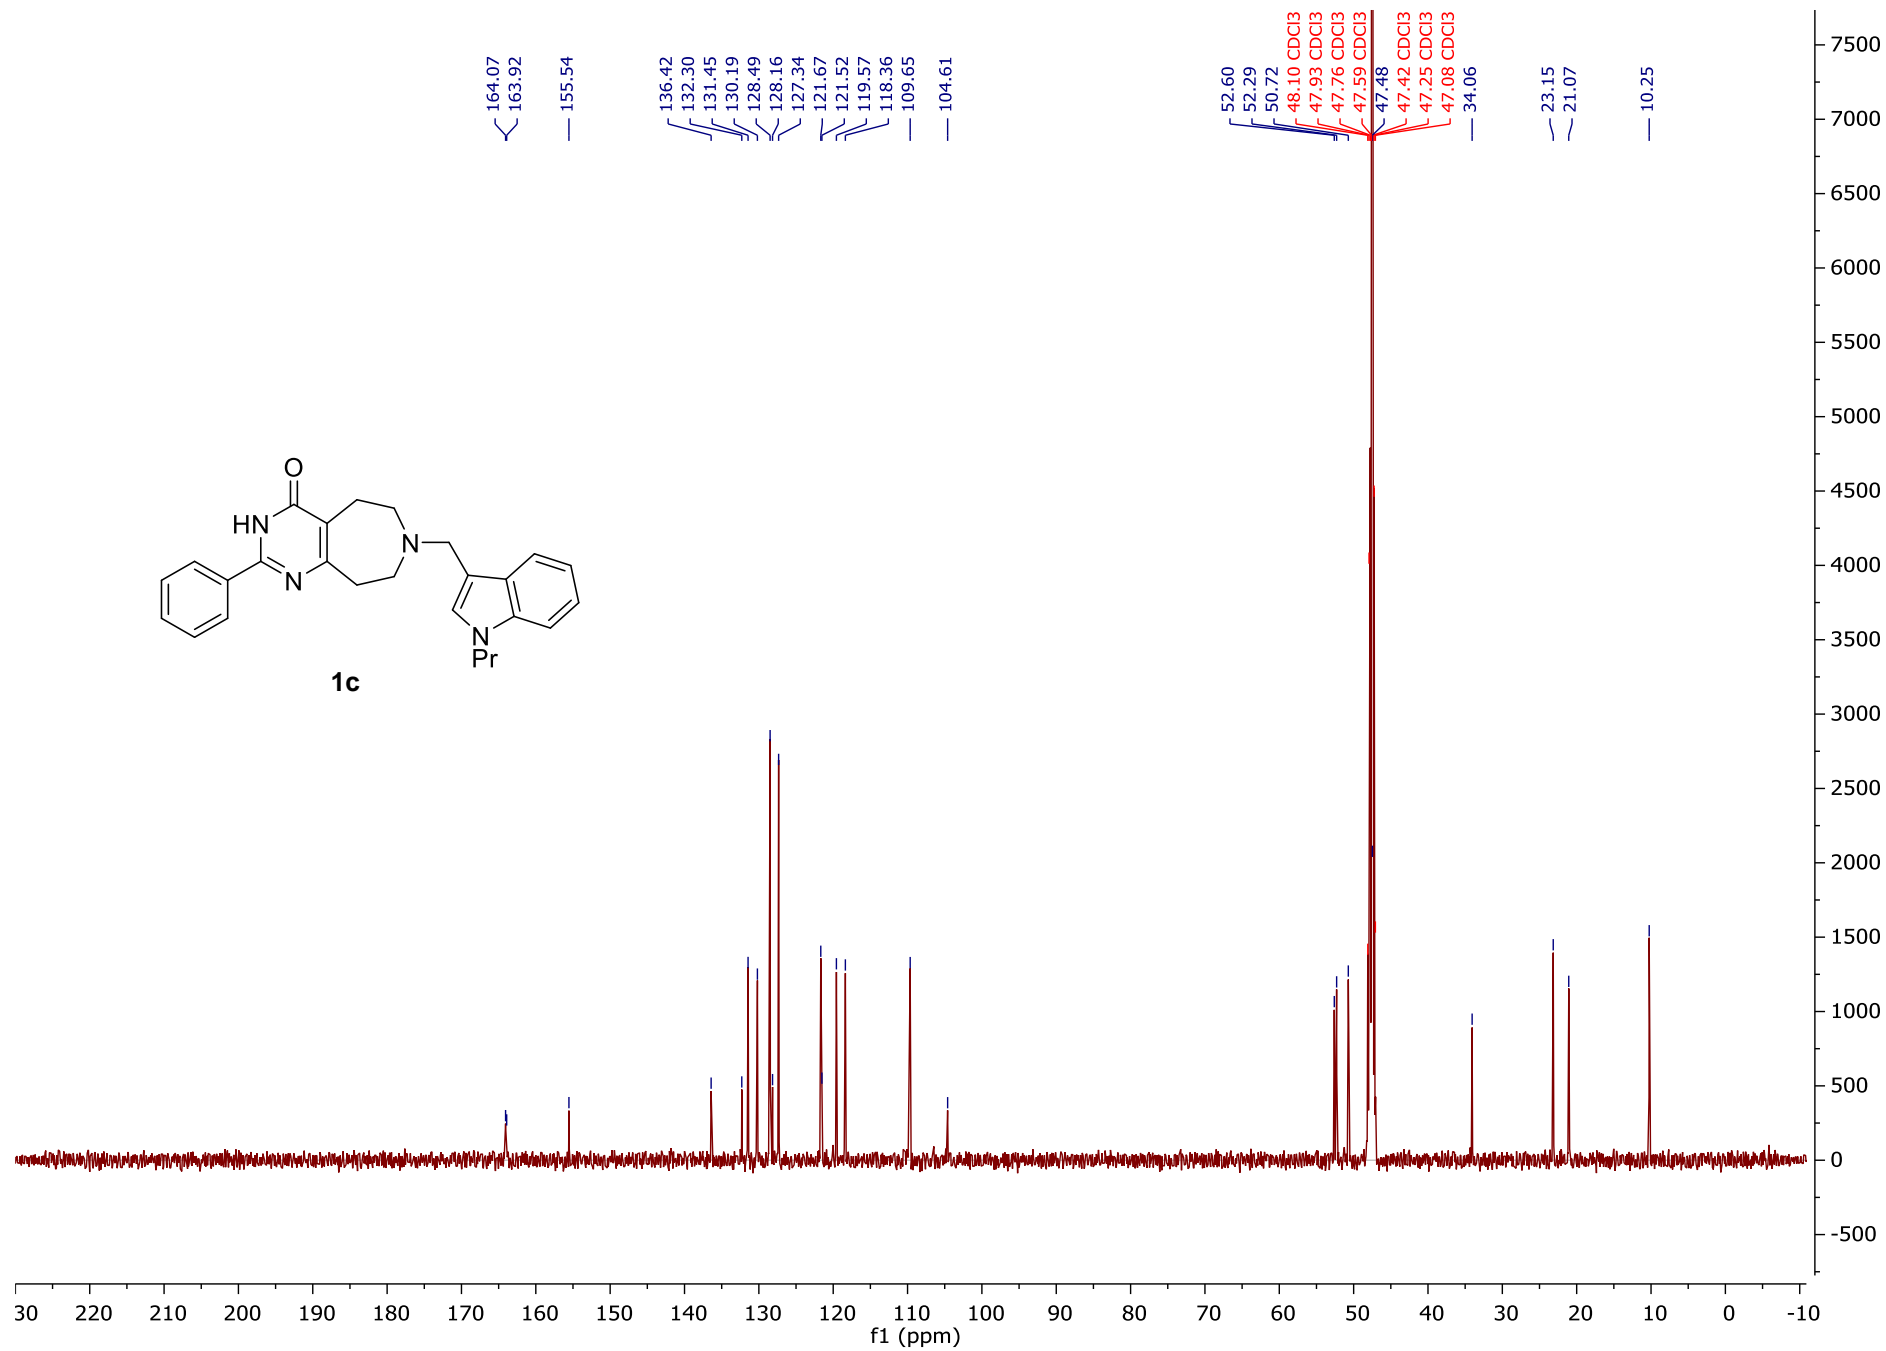

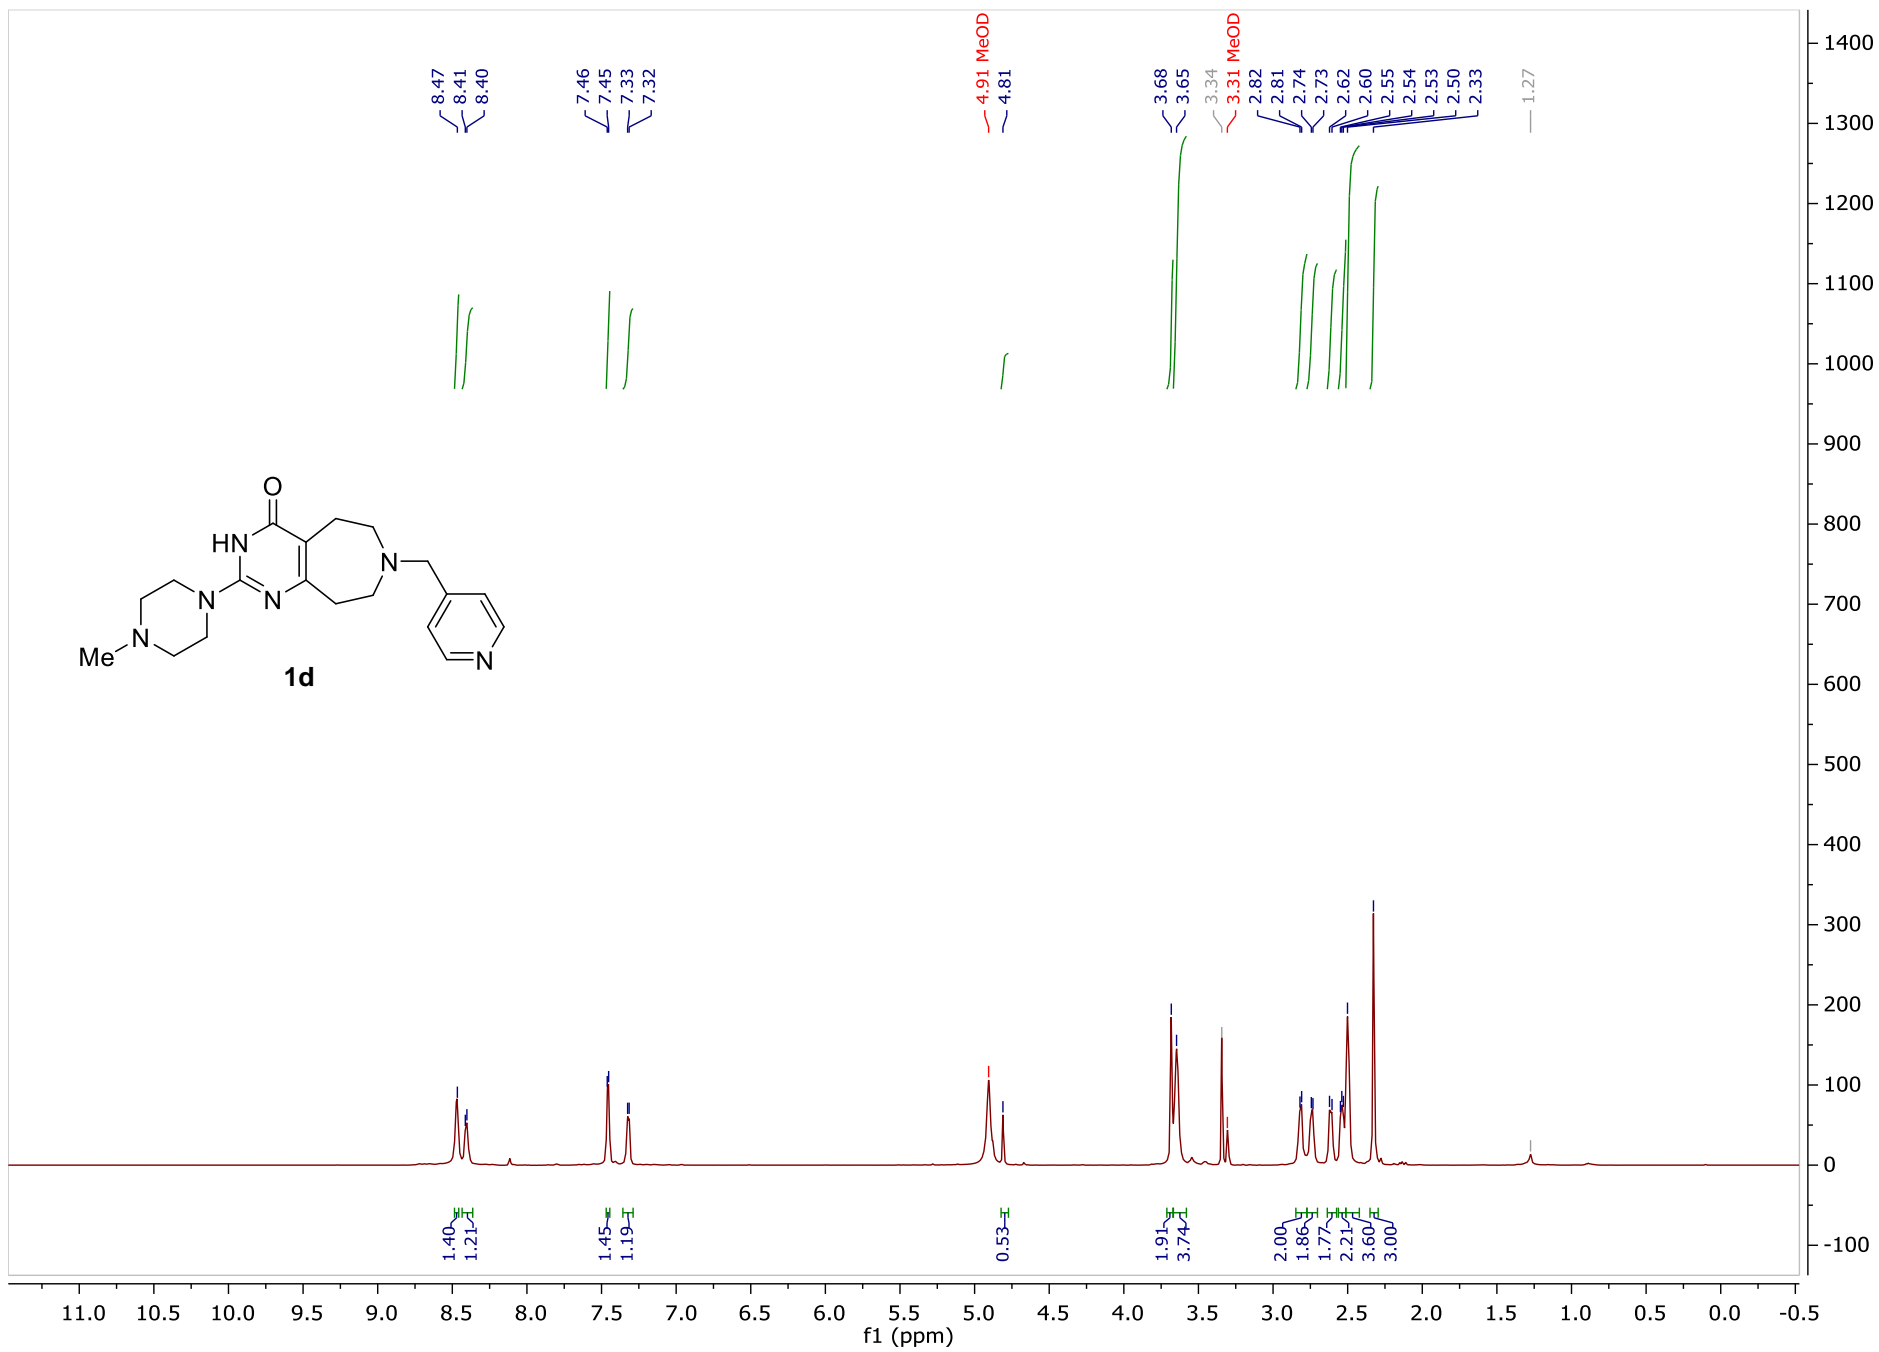

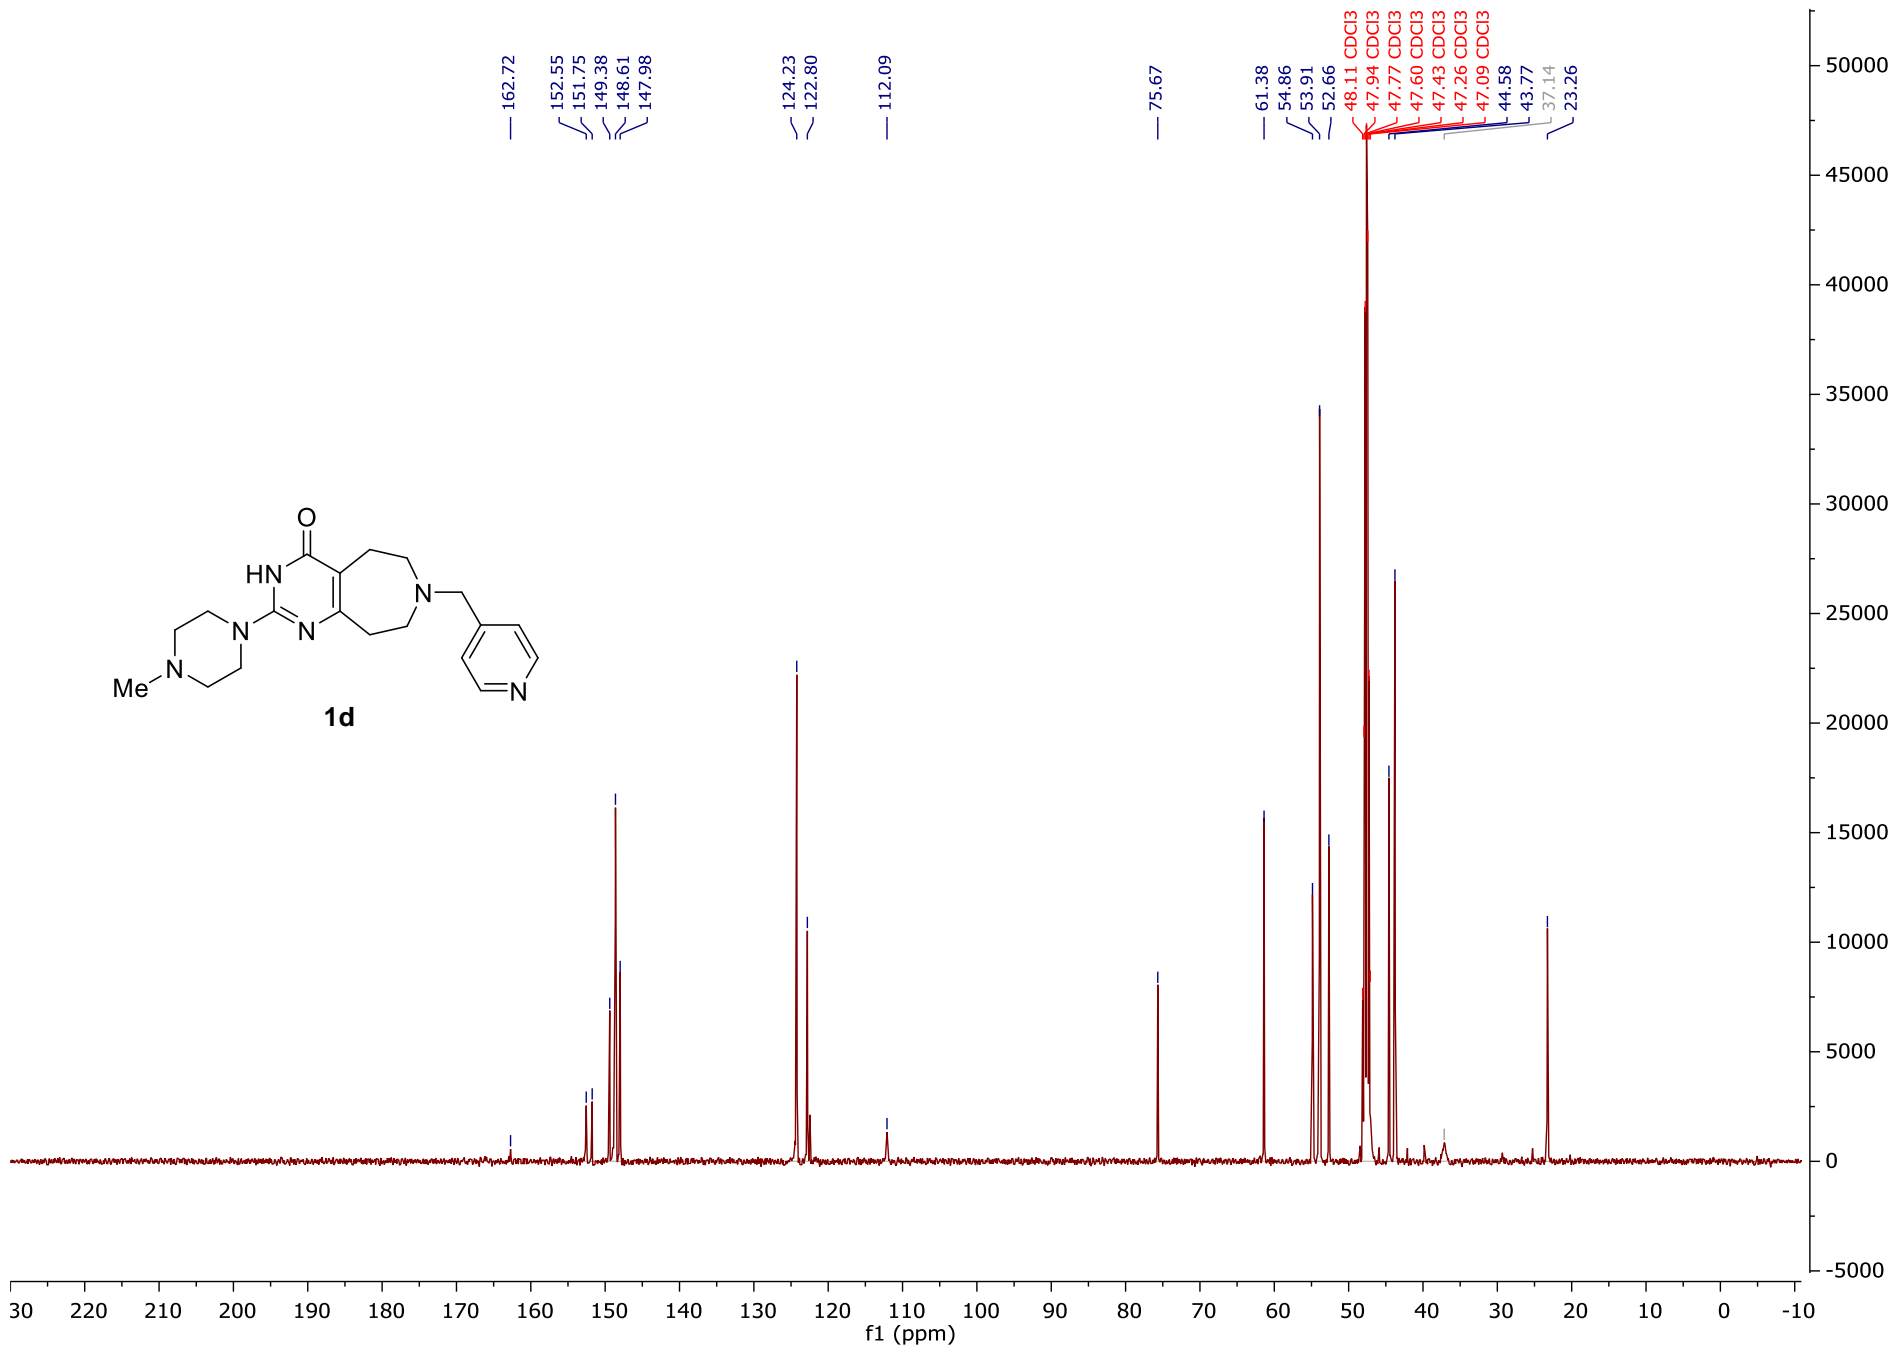



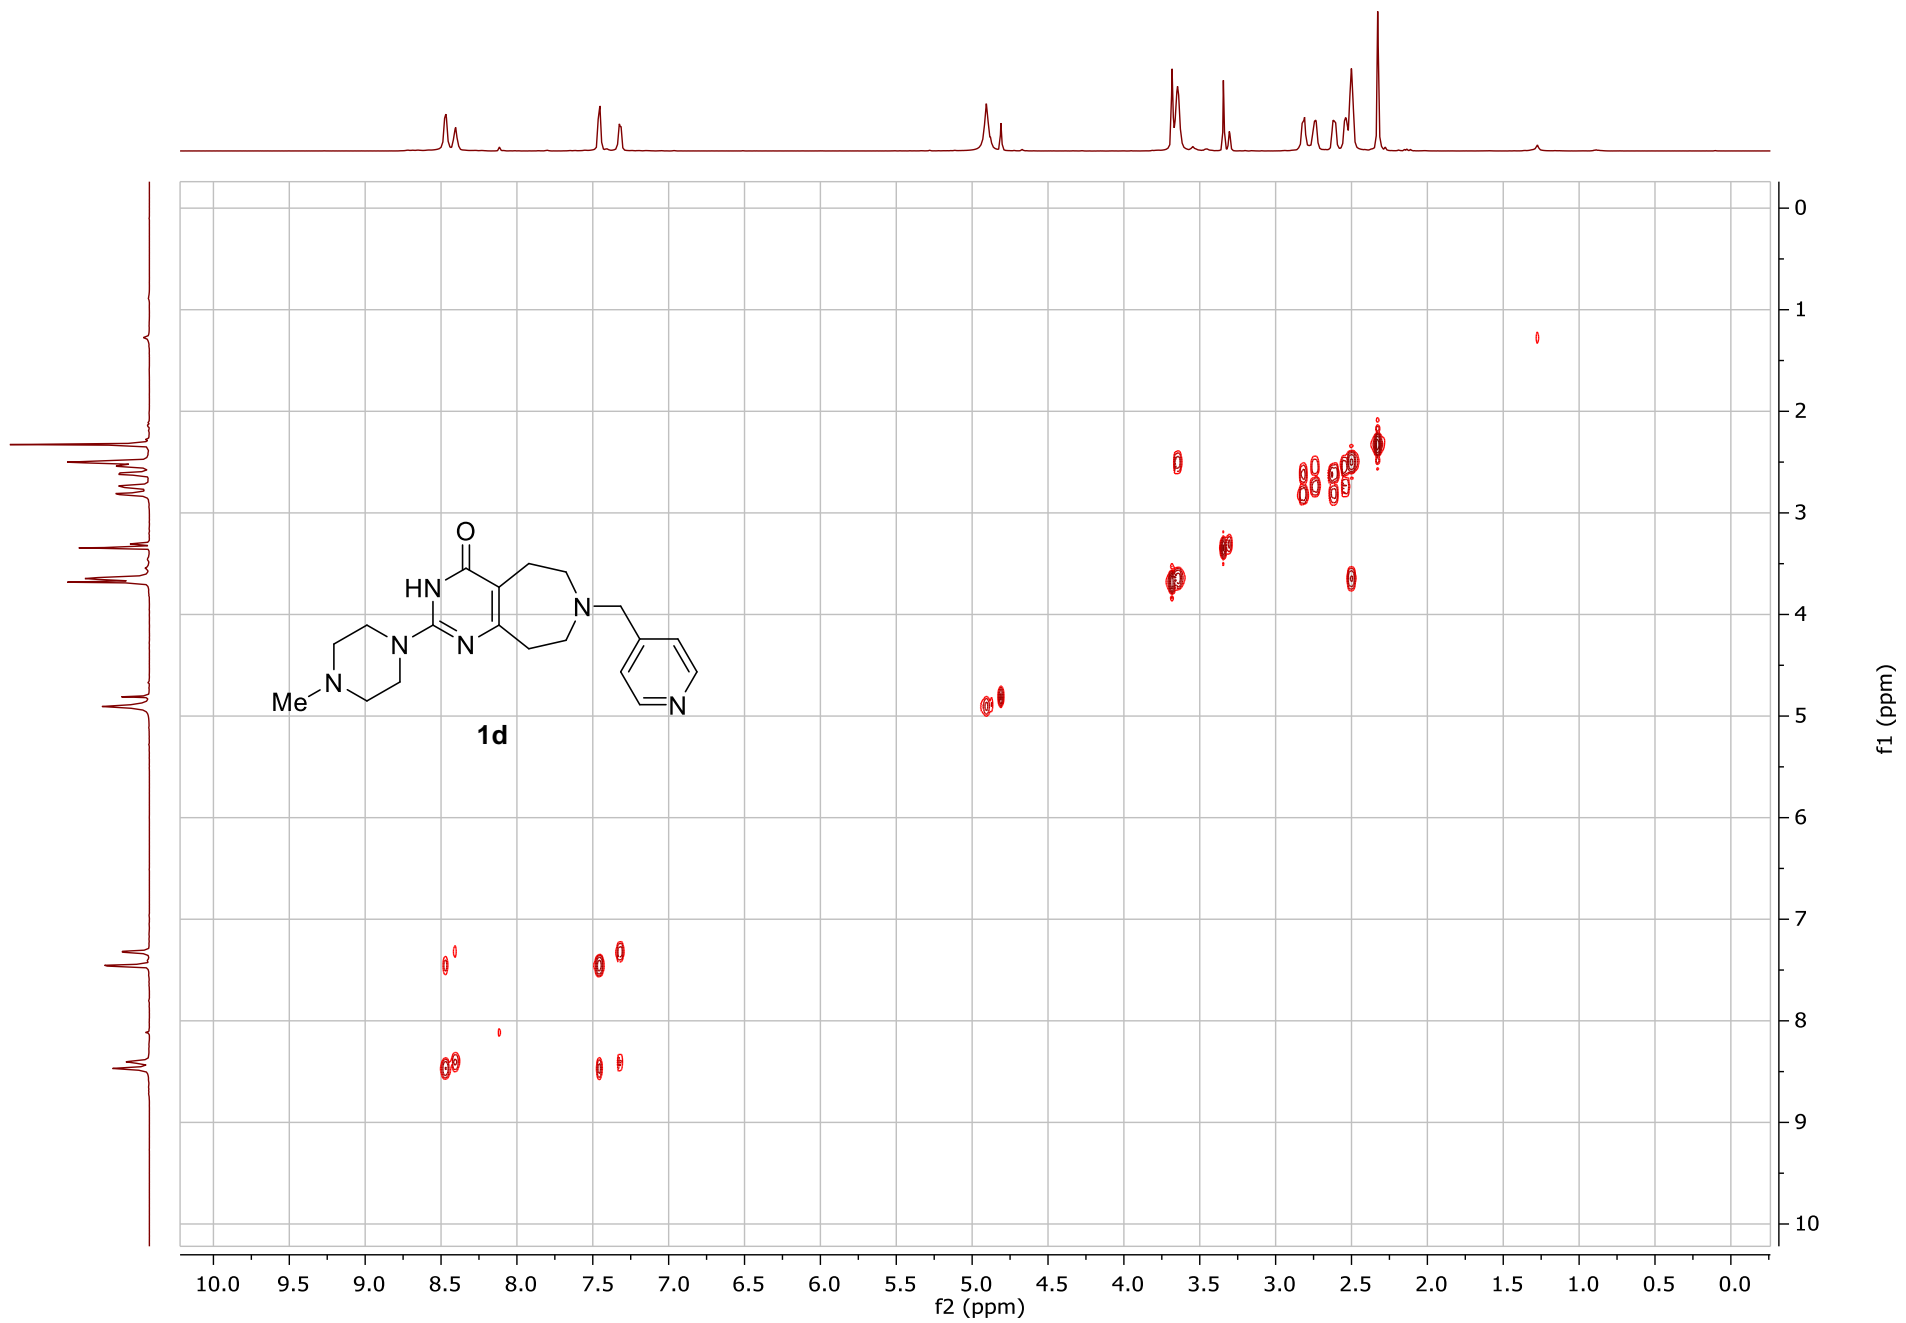

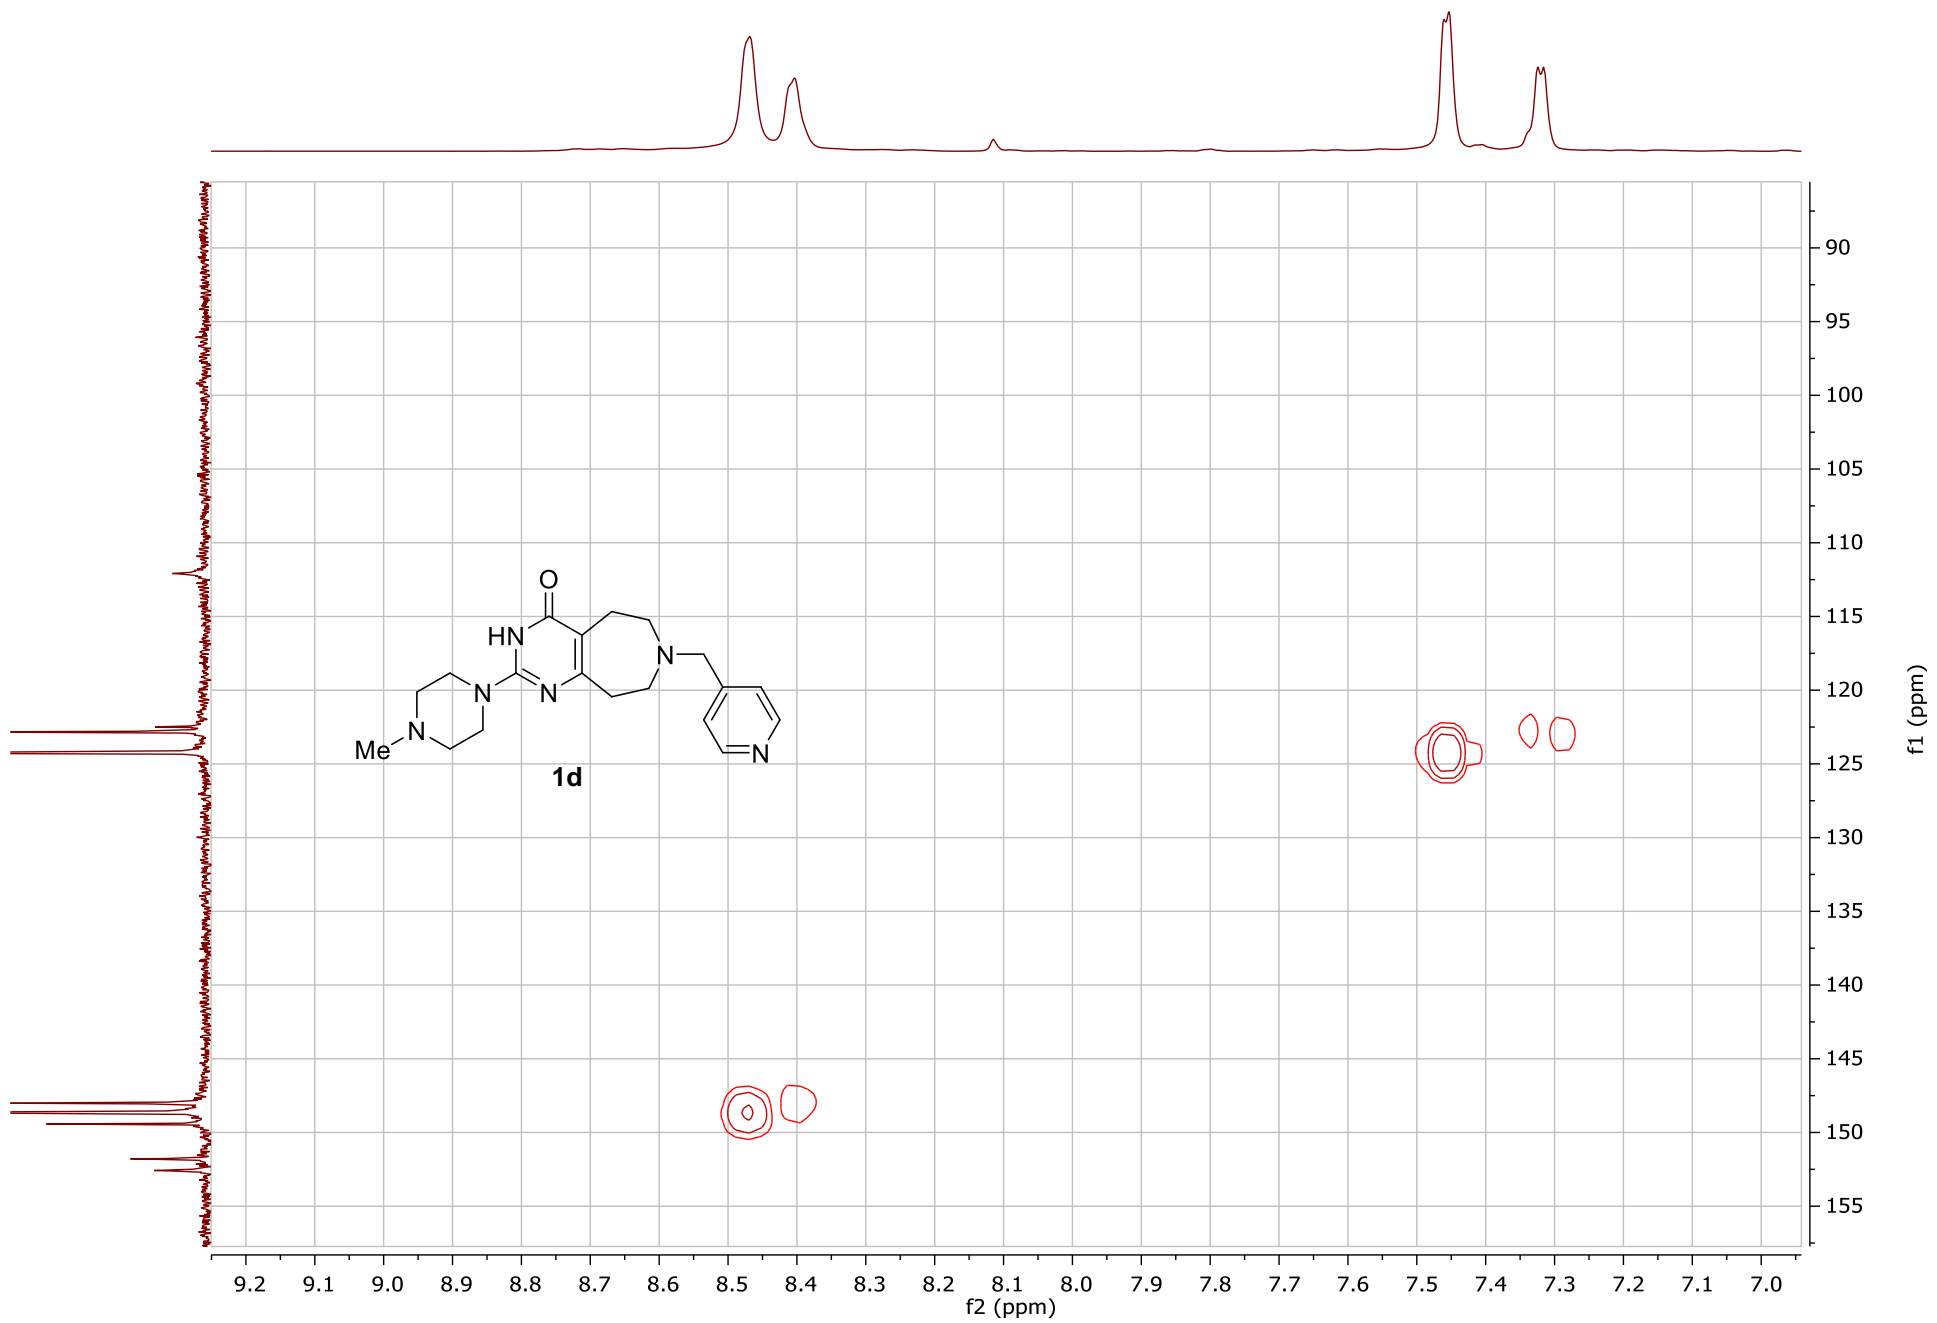

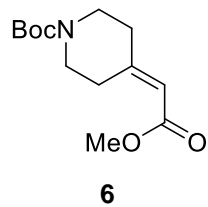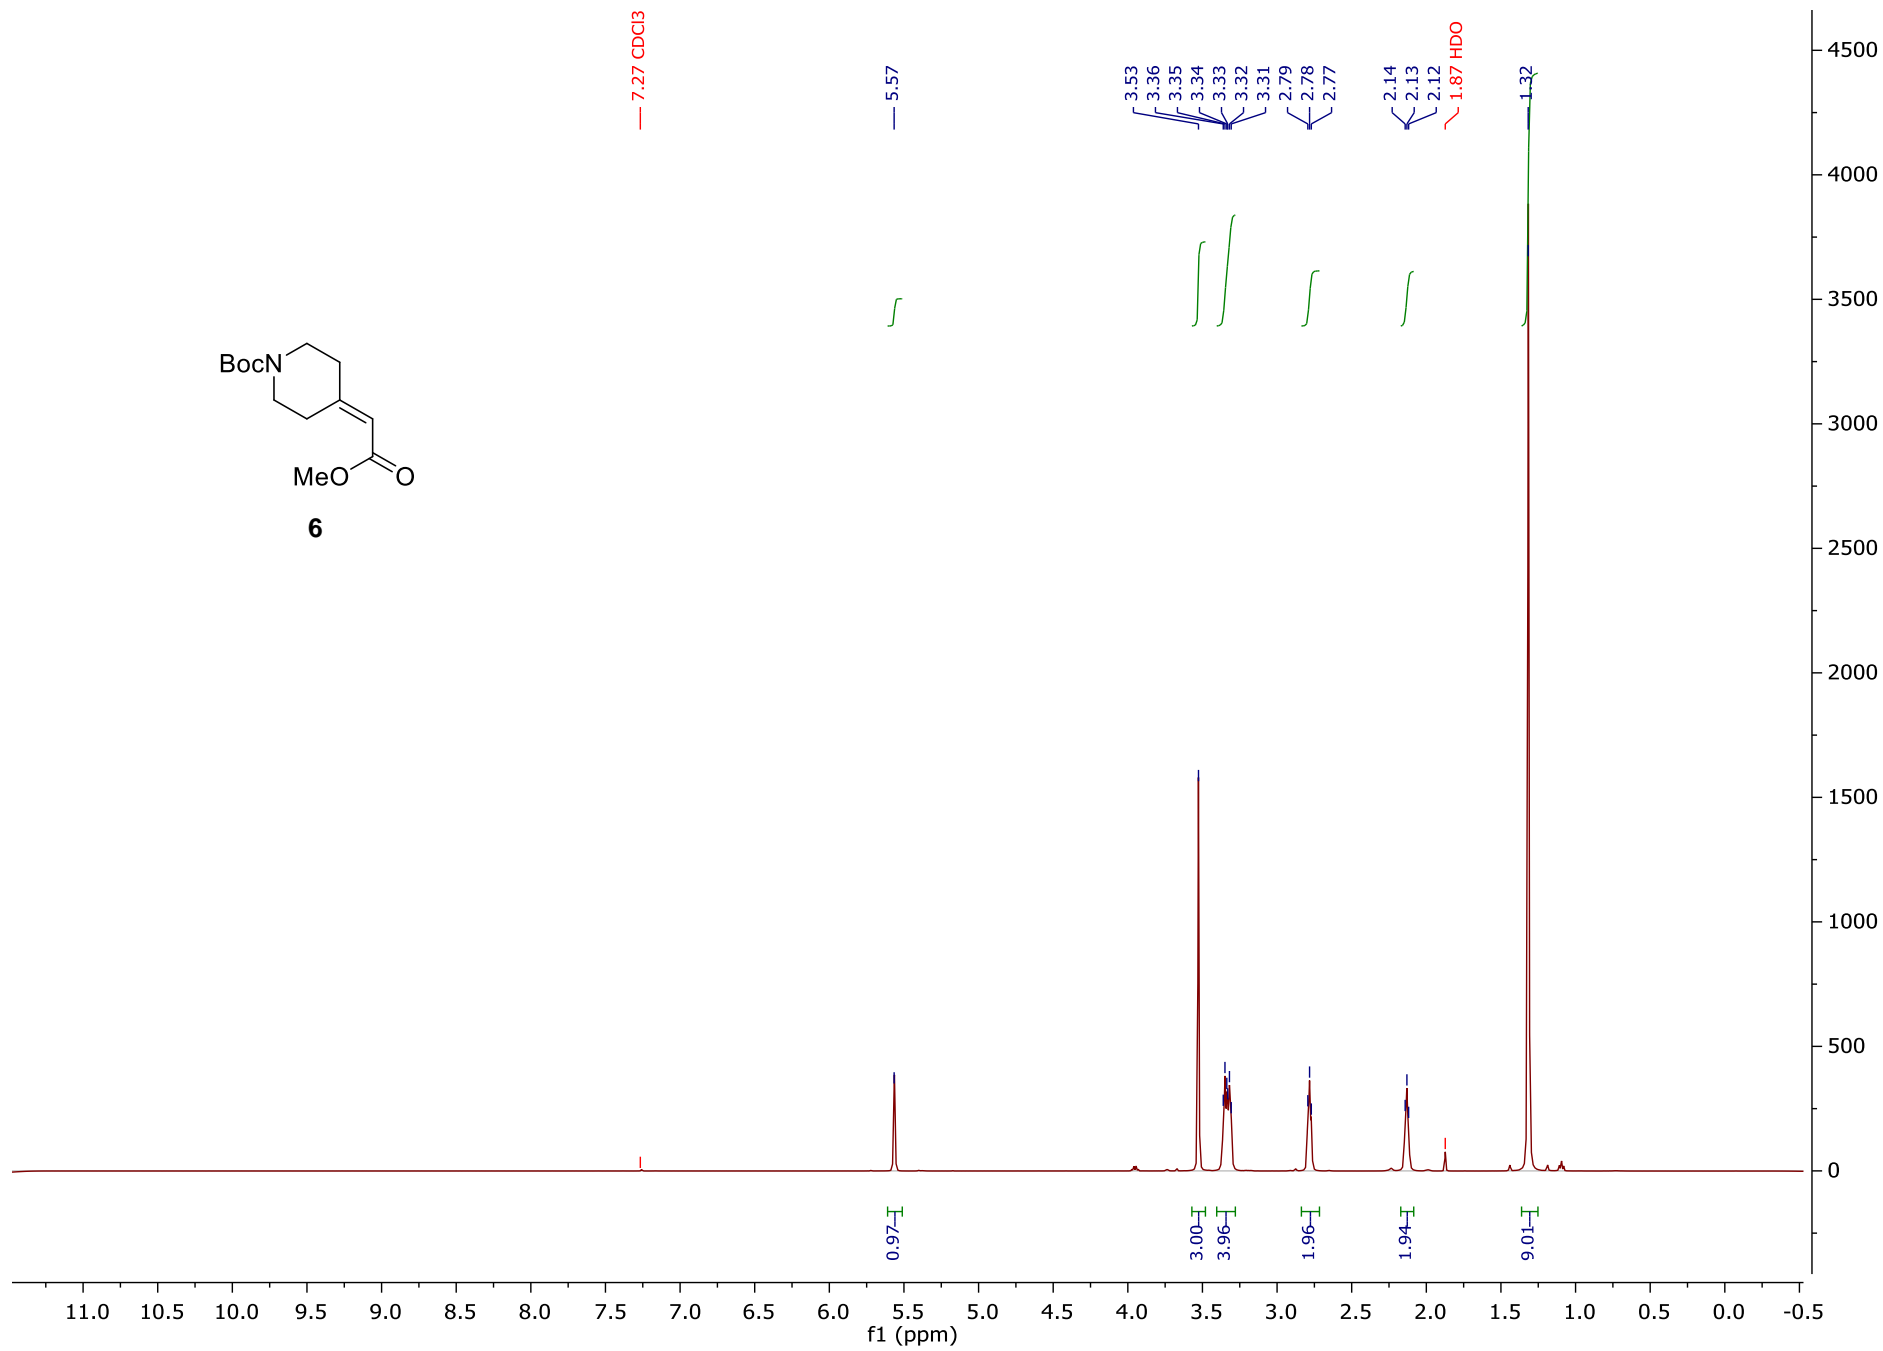

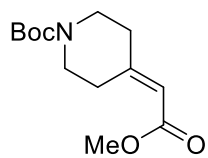

6

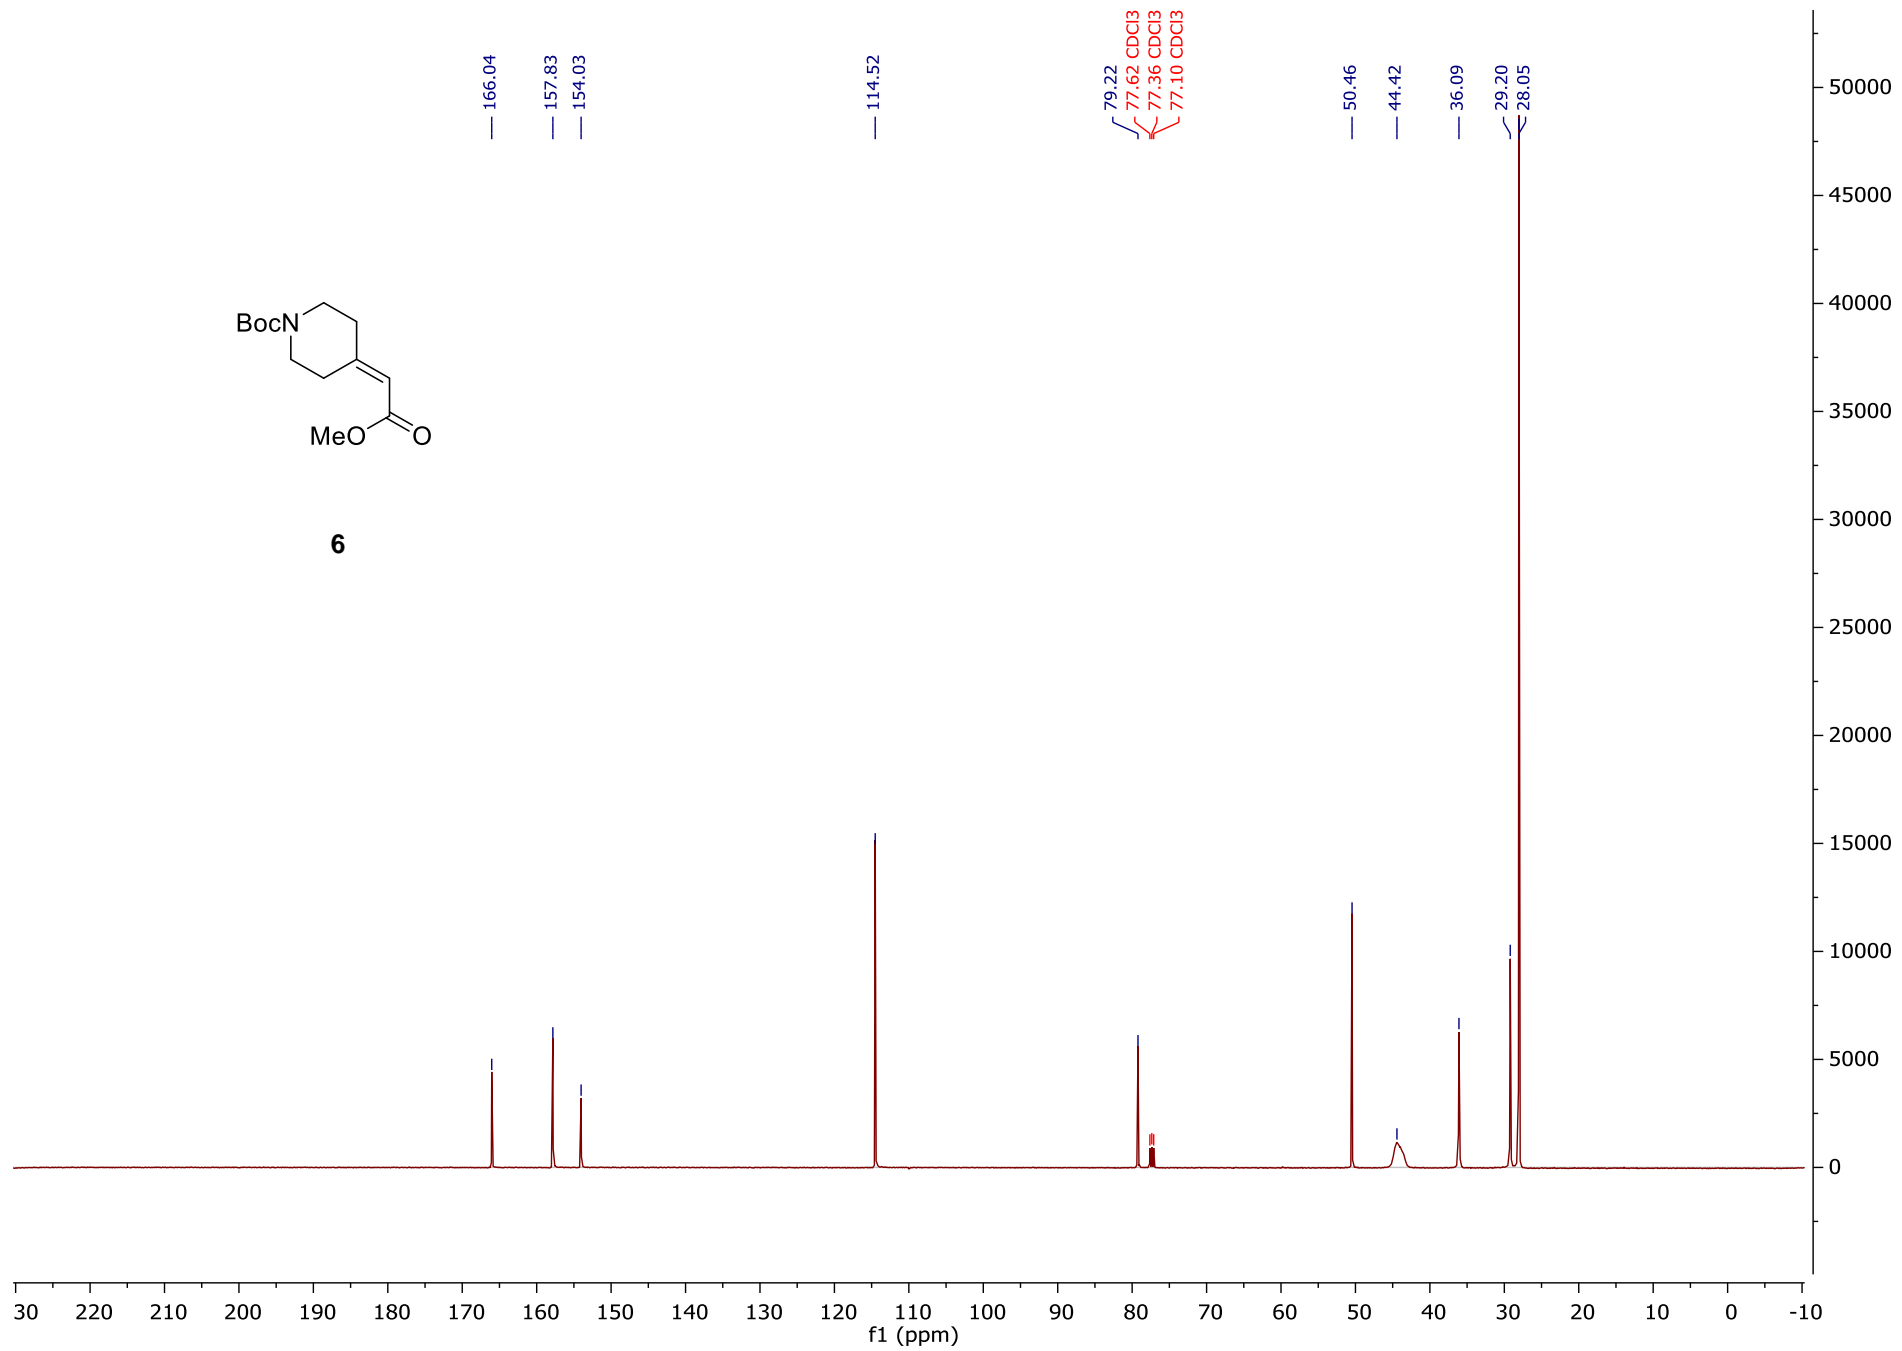

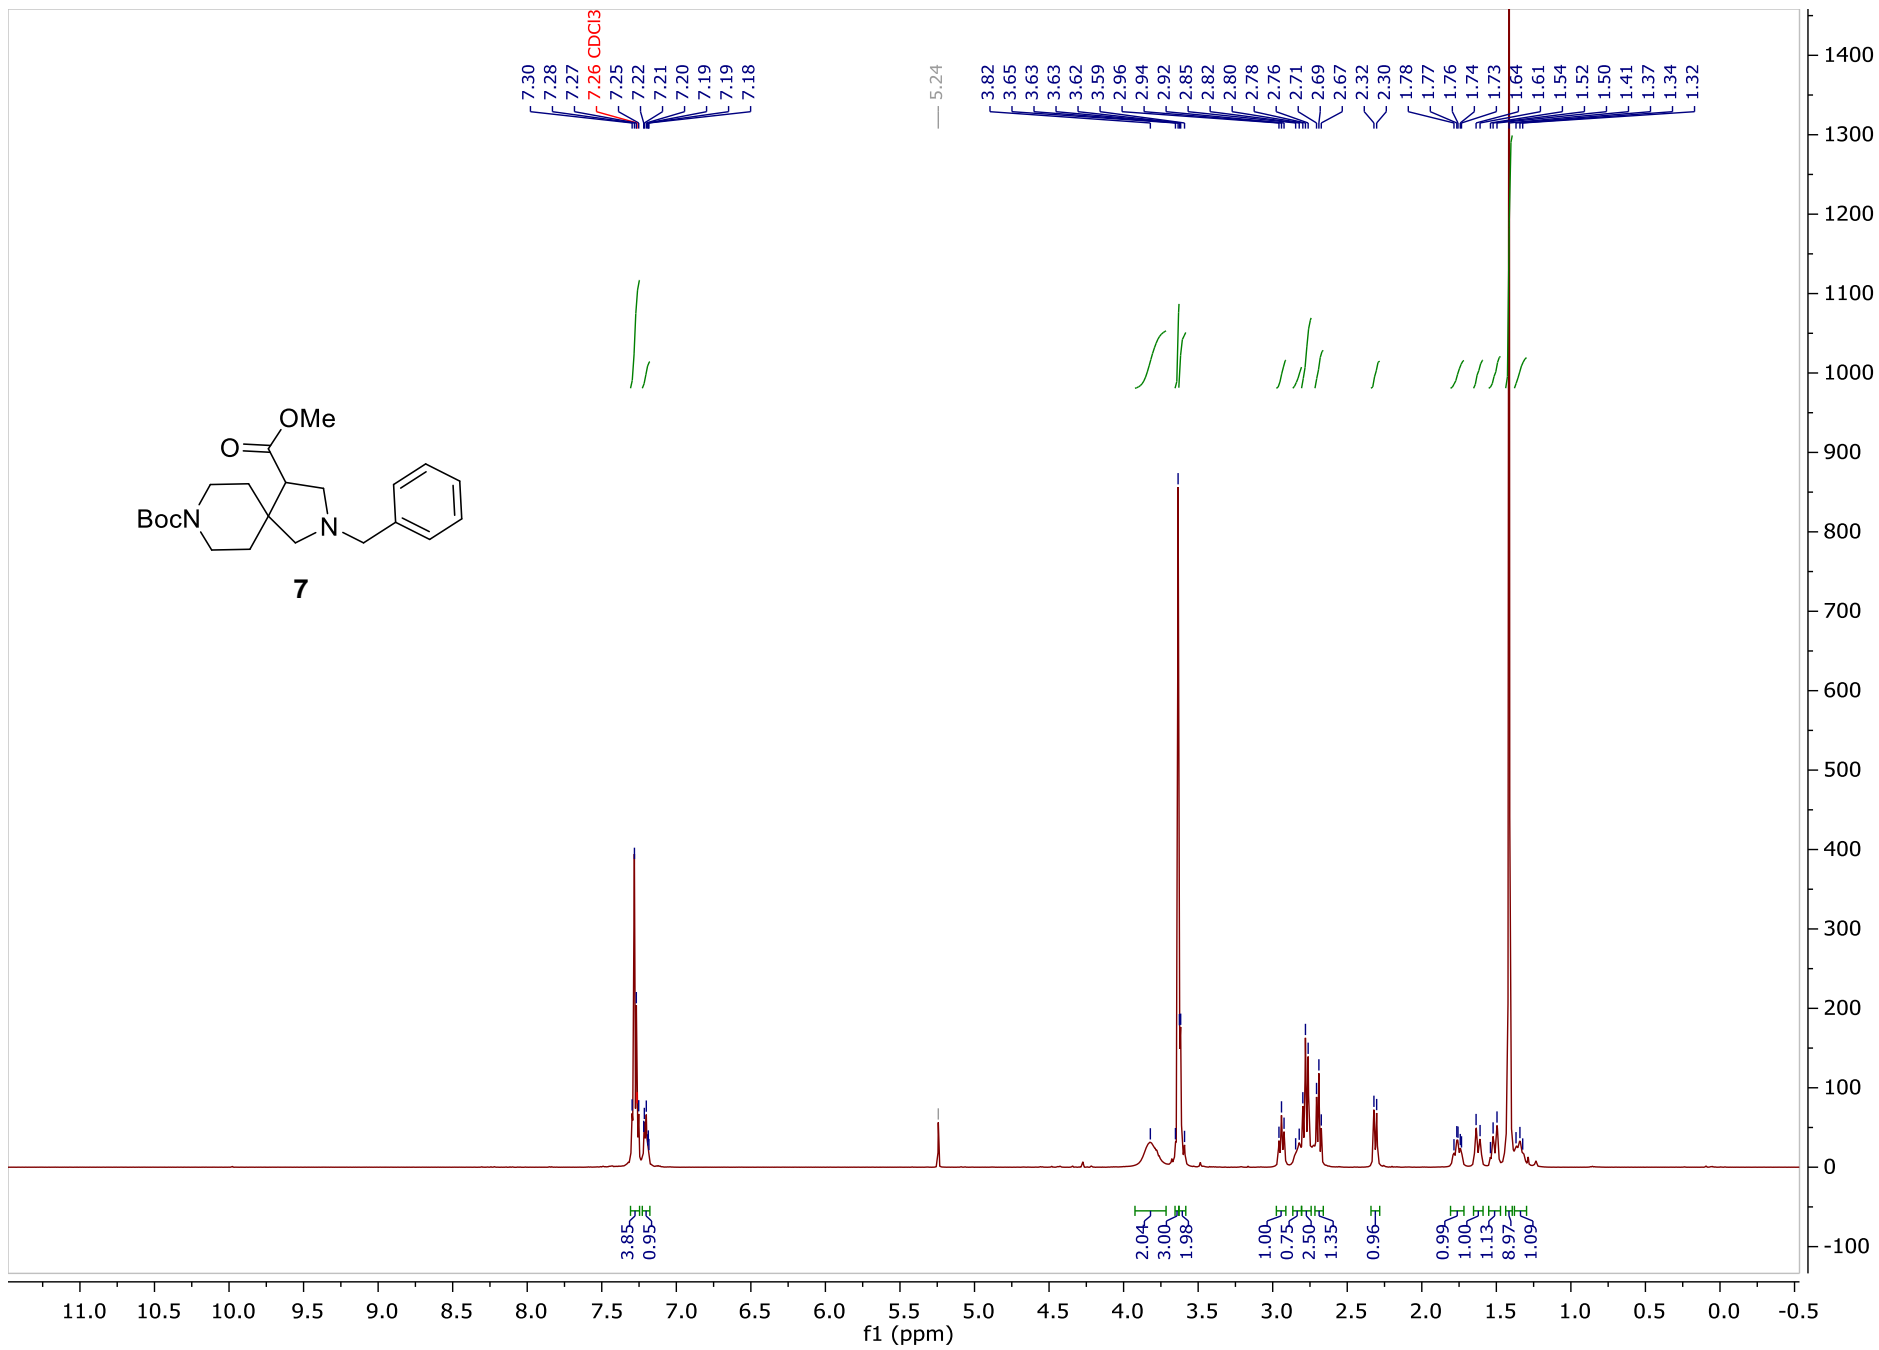

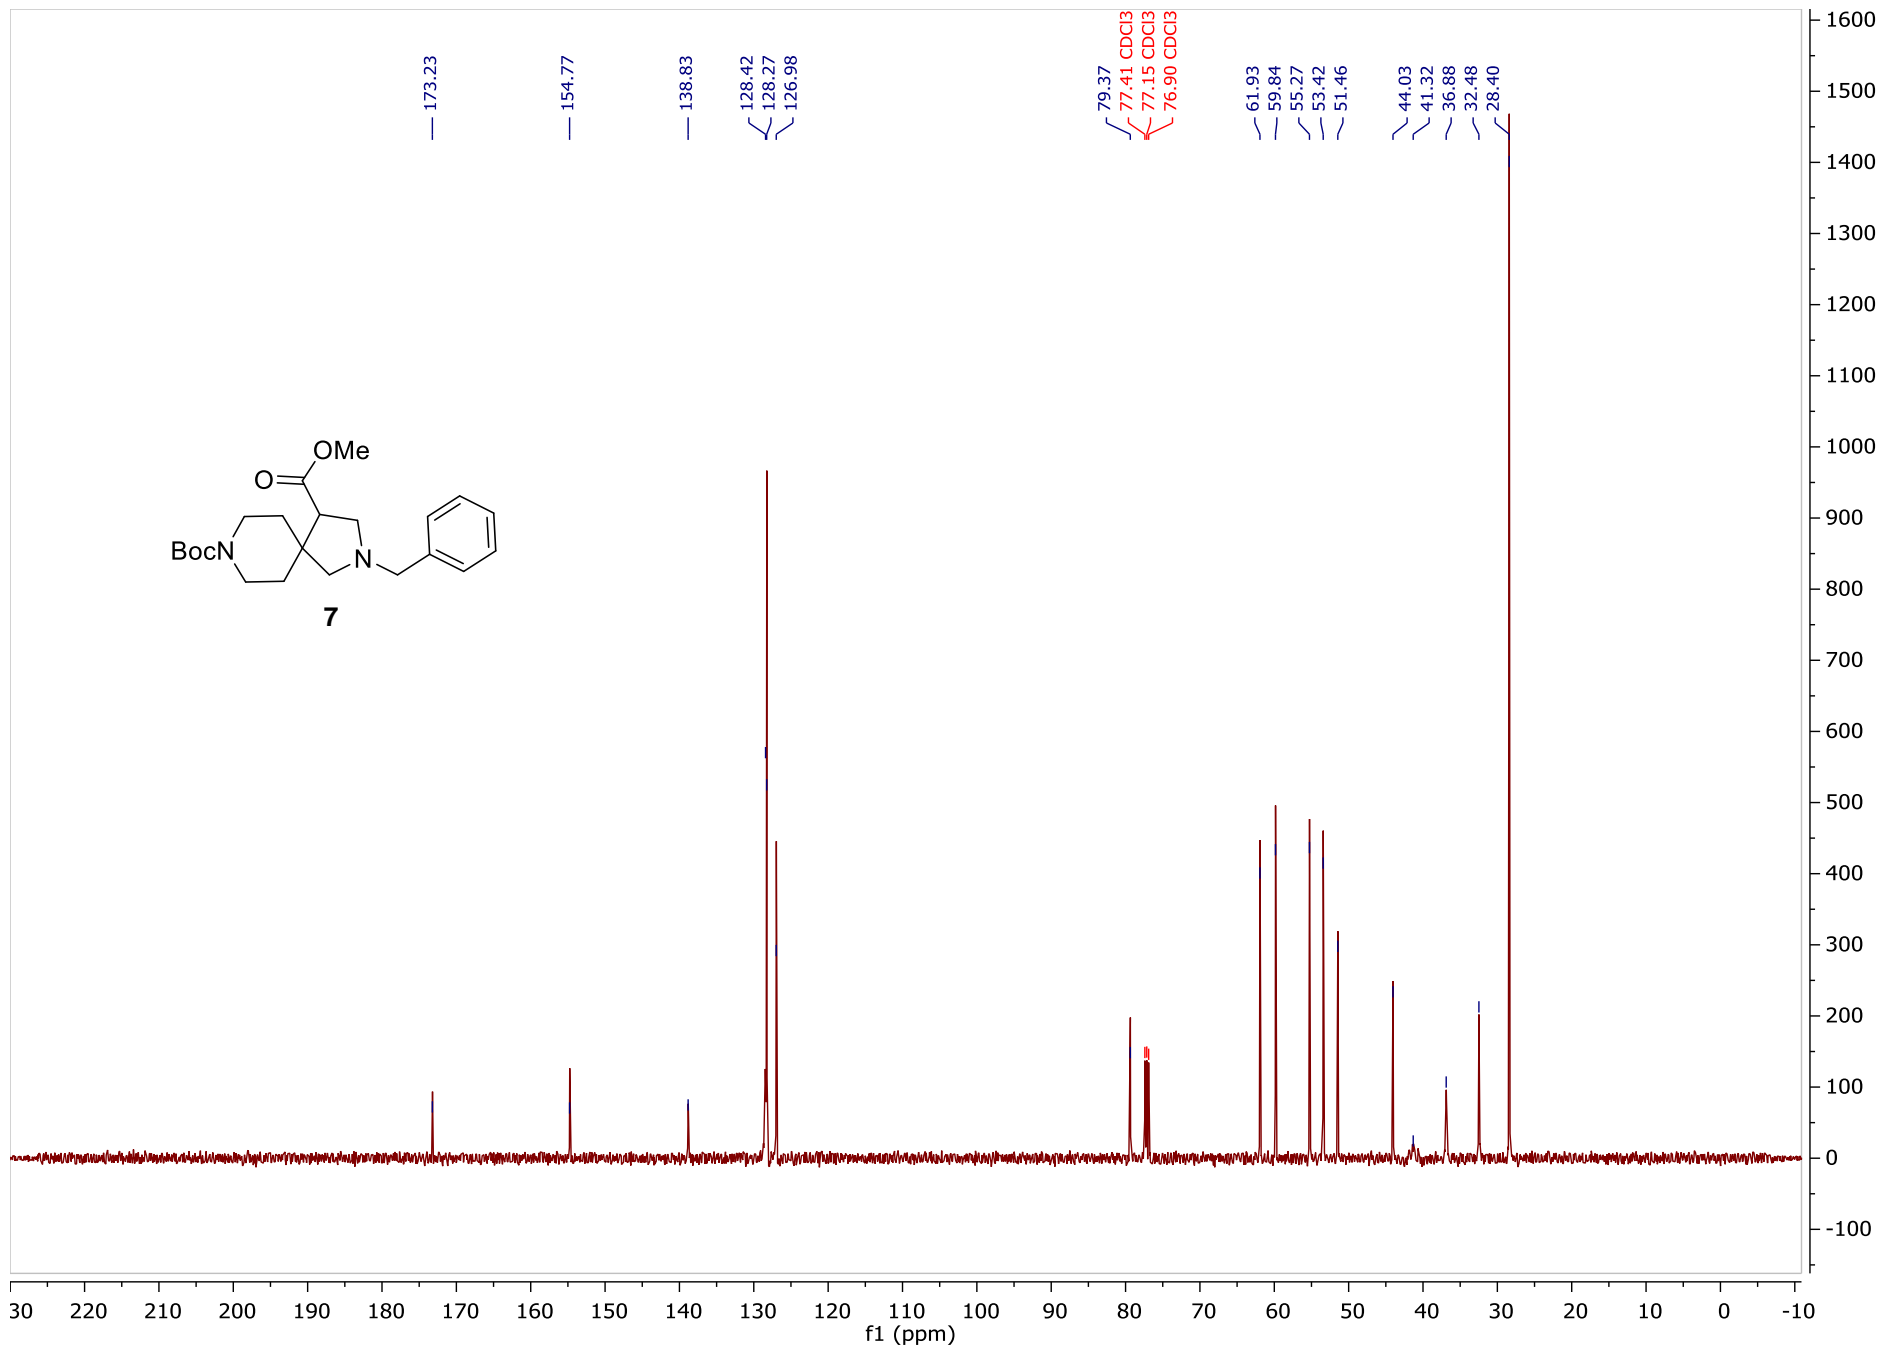

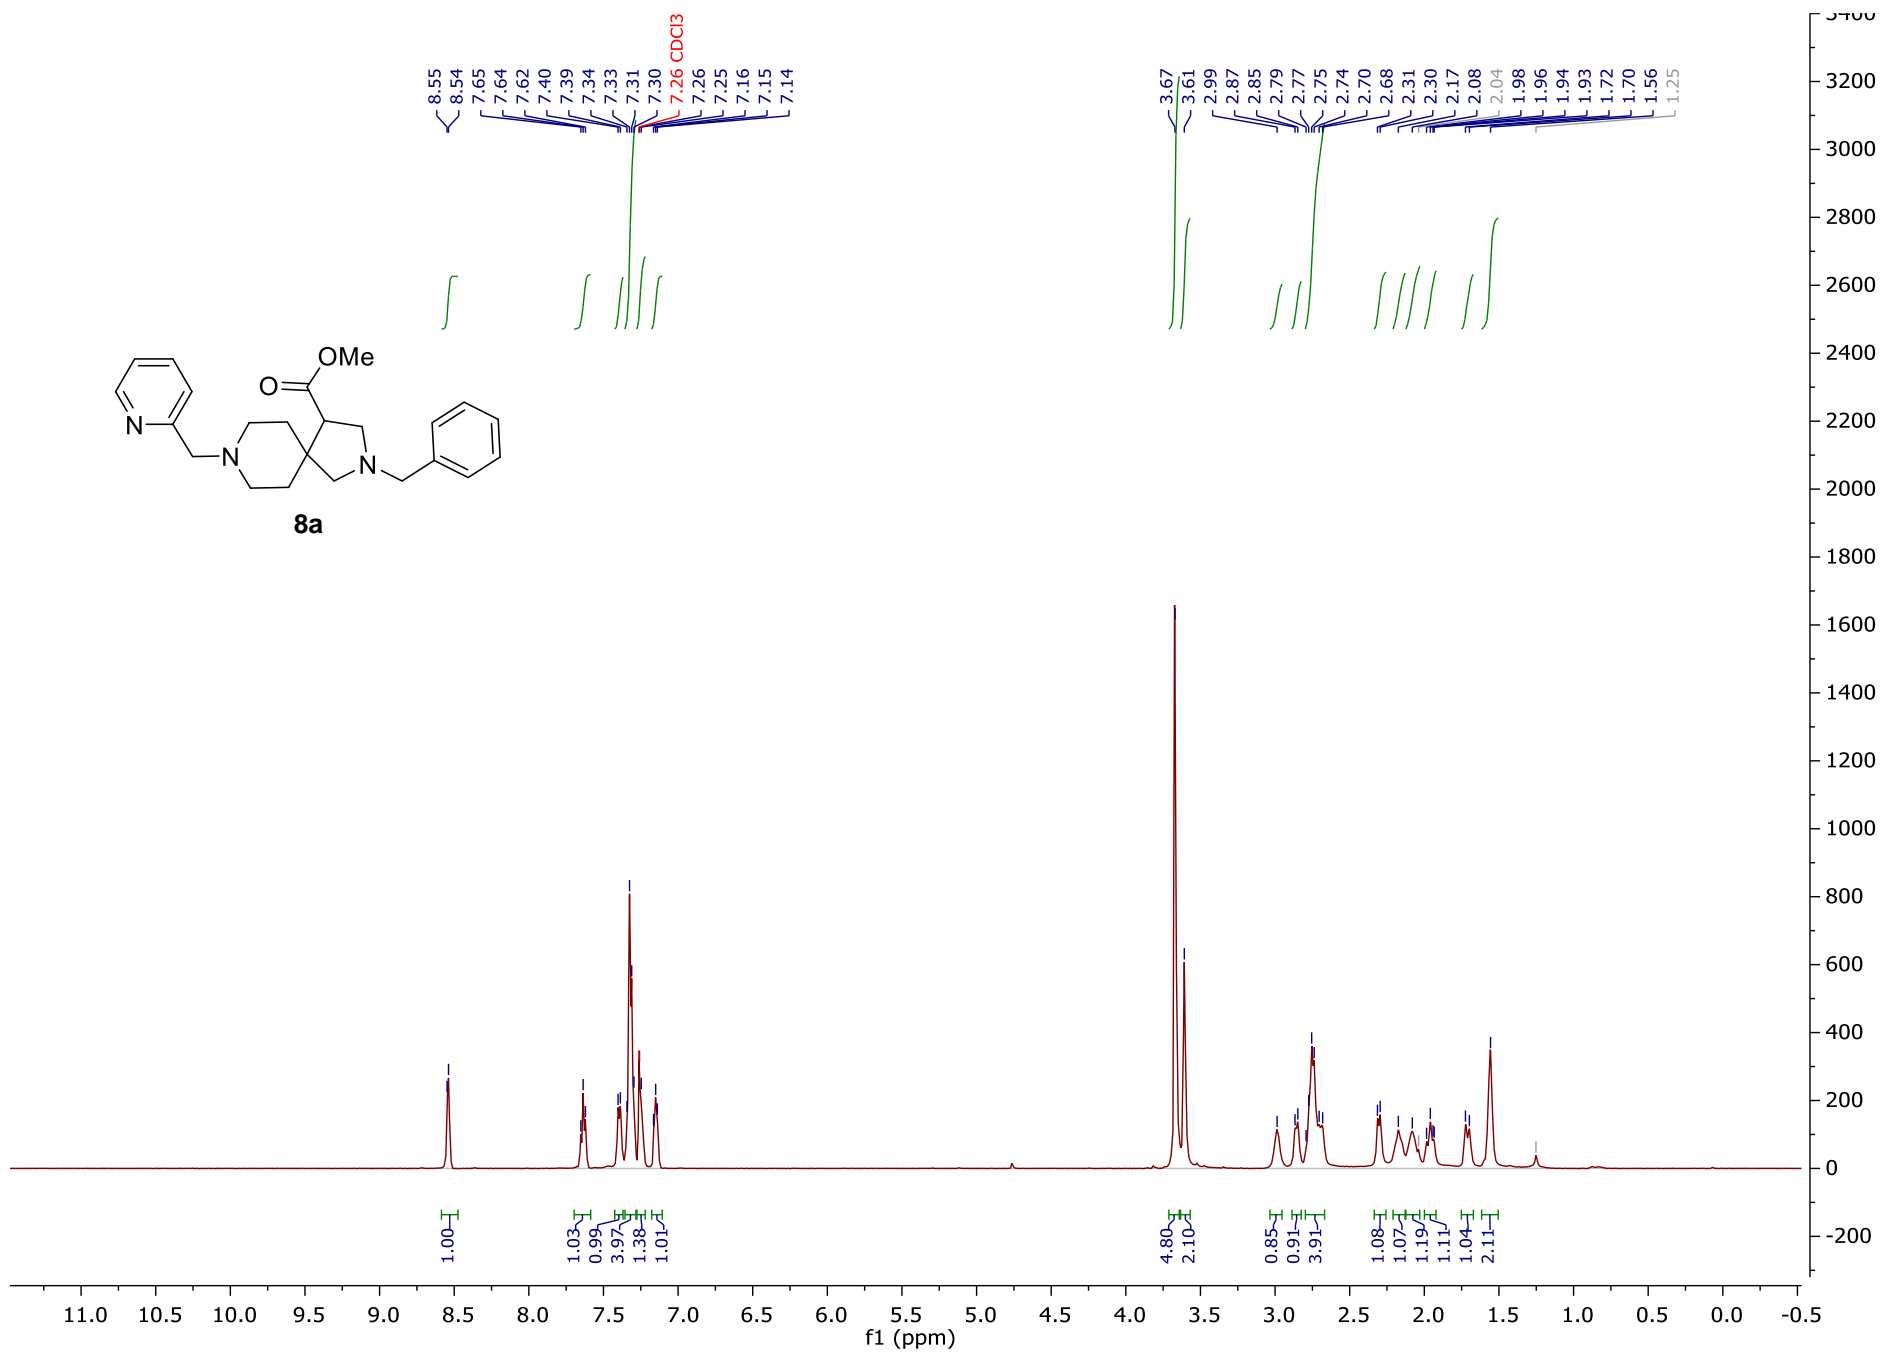

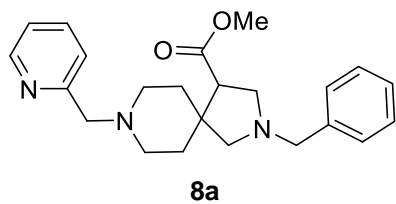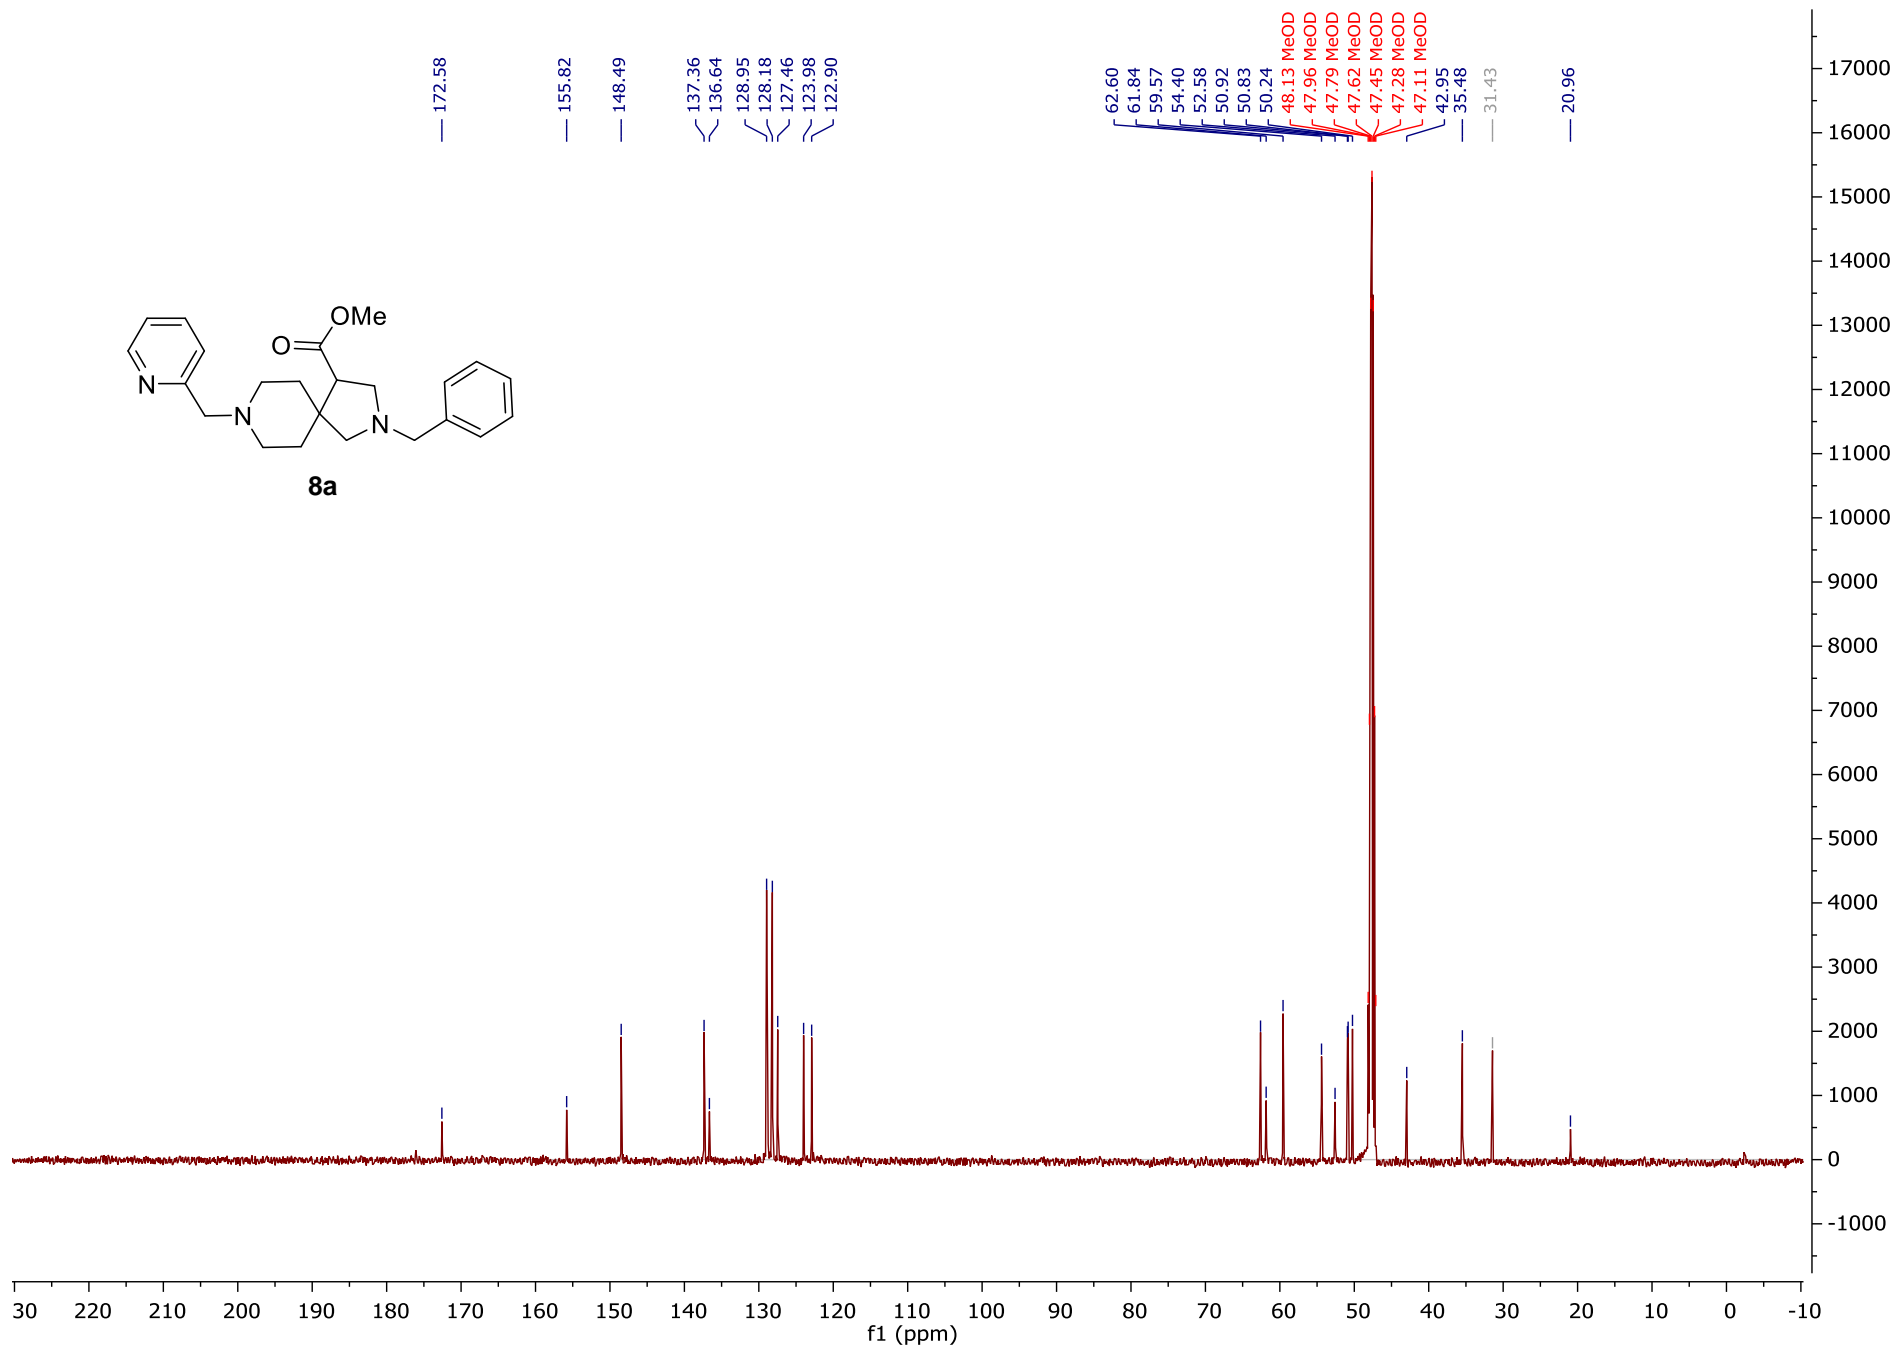



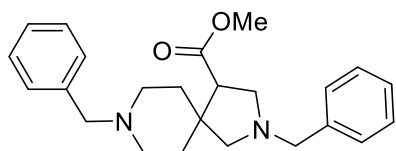

8b

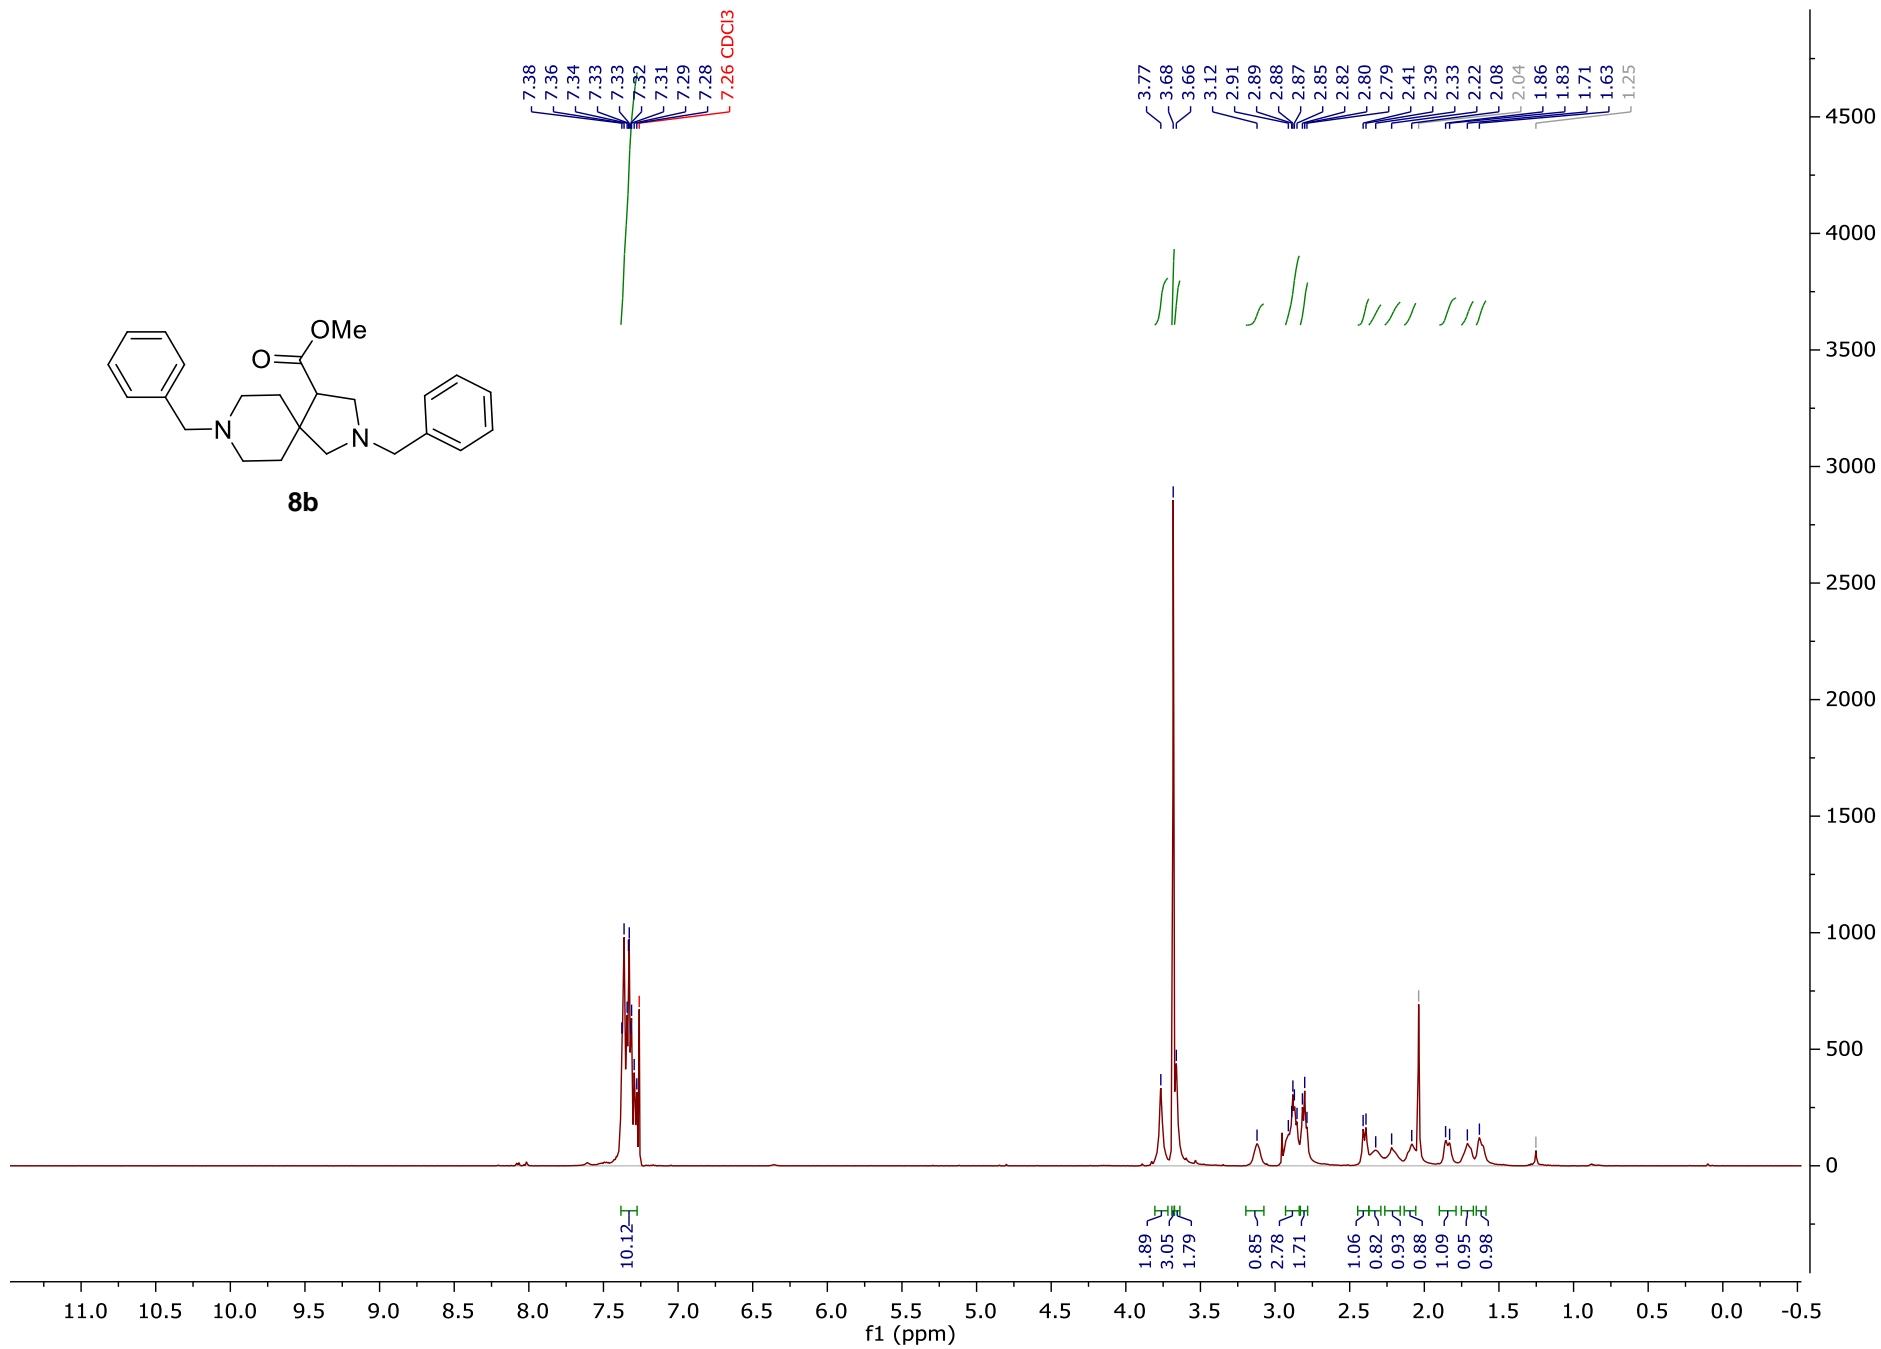

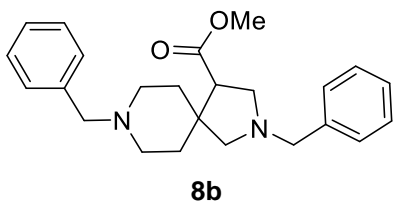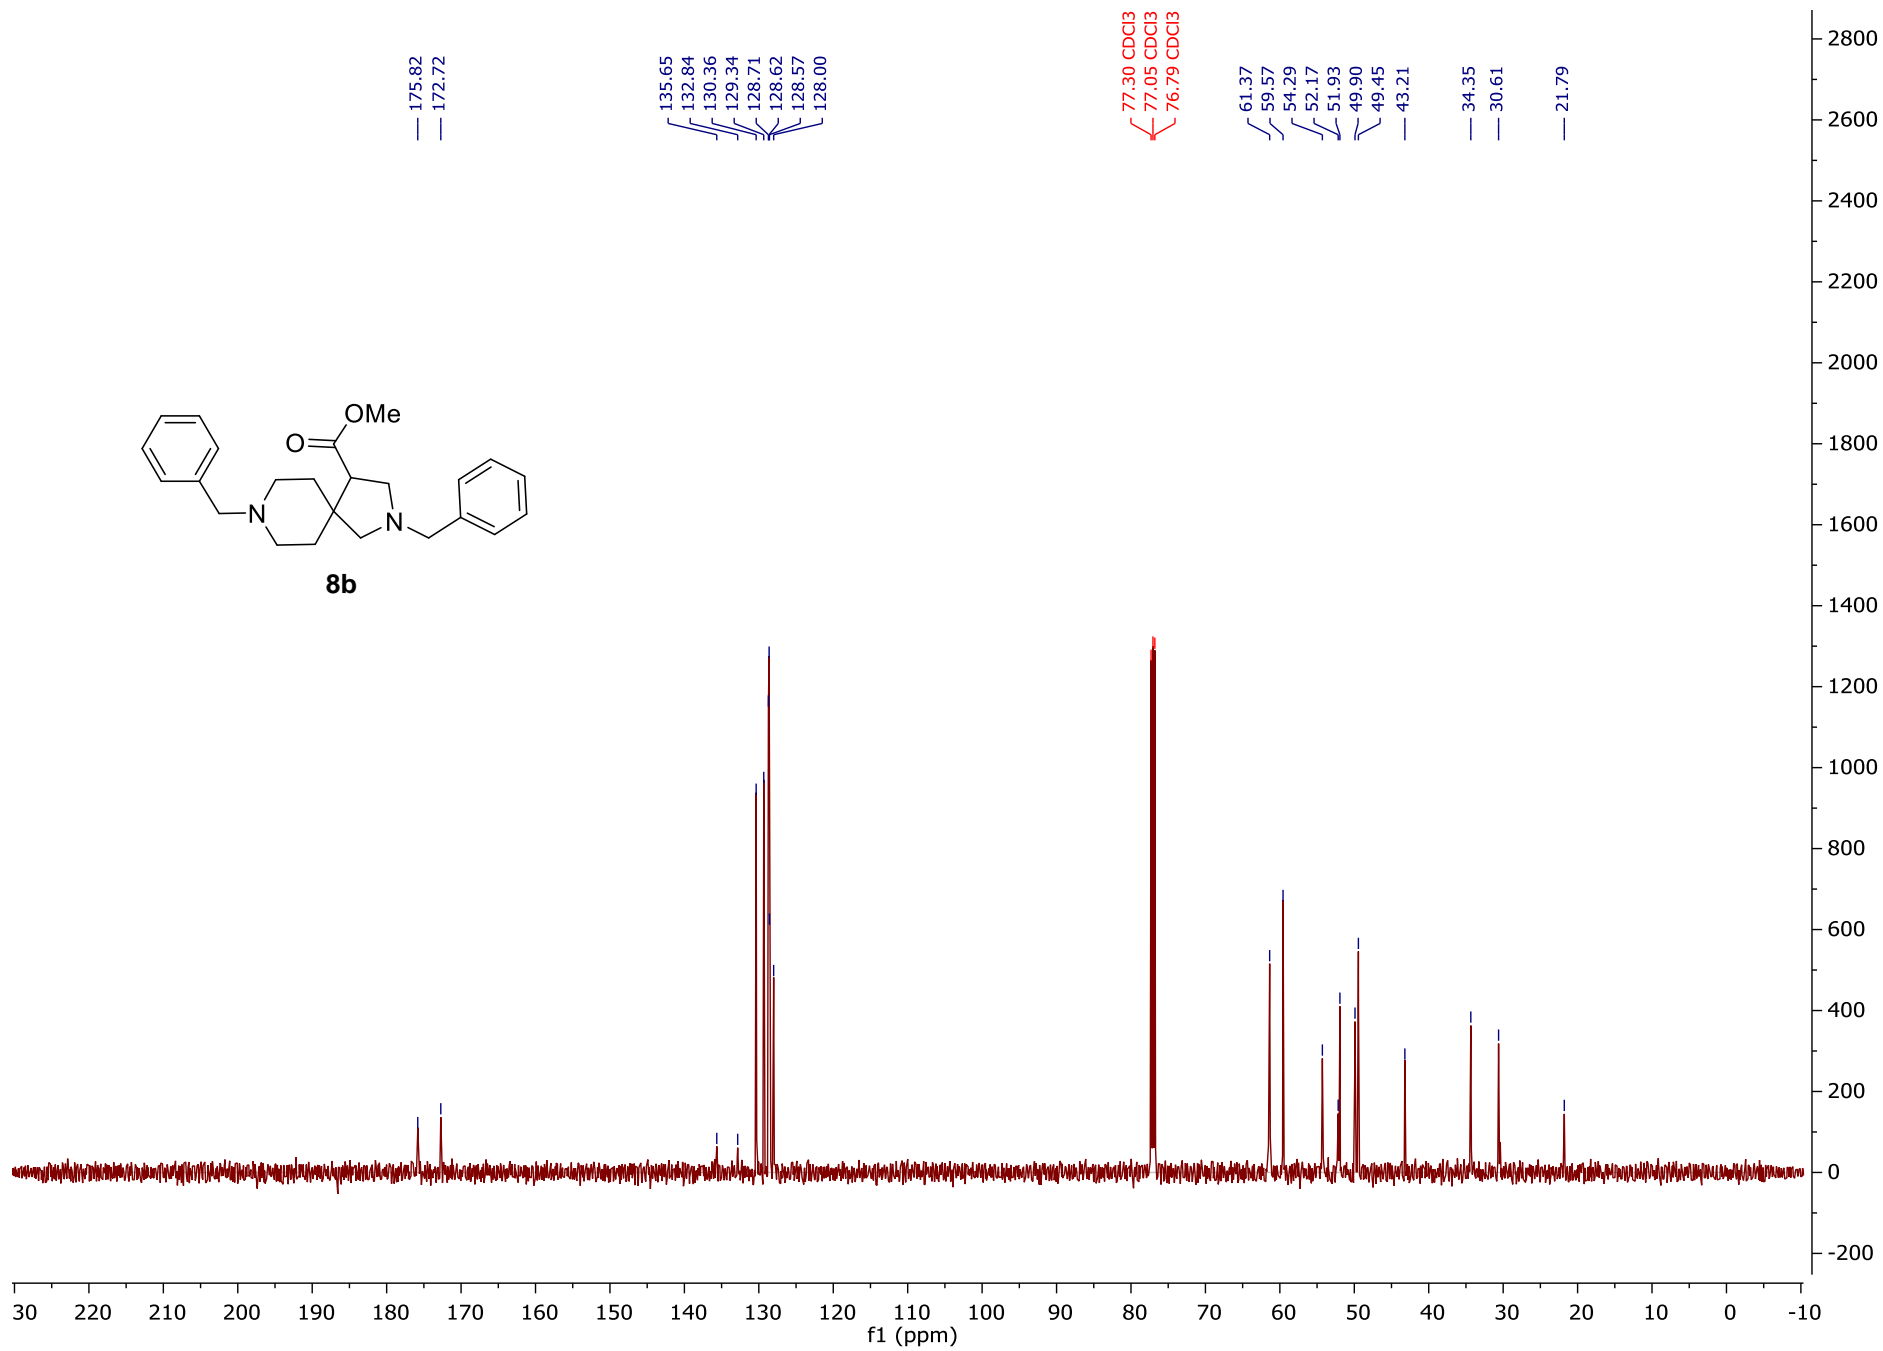

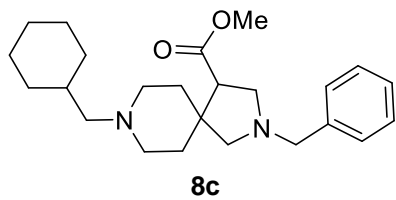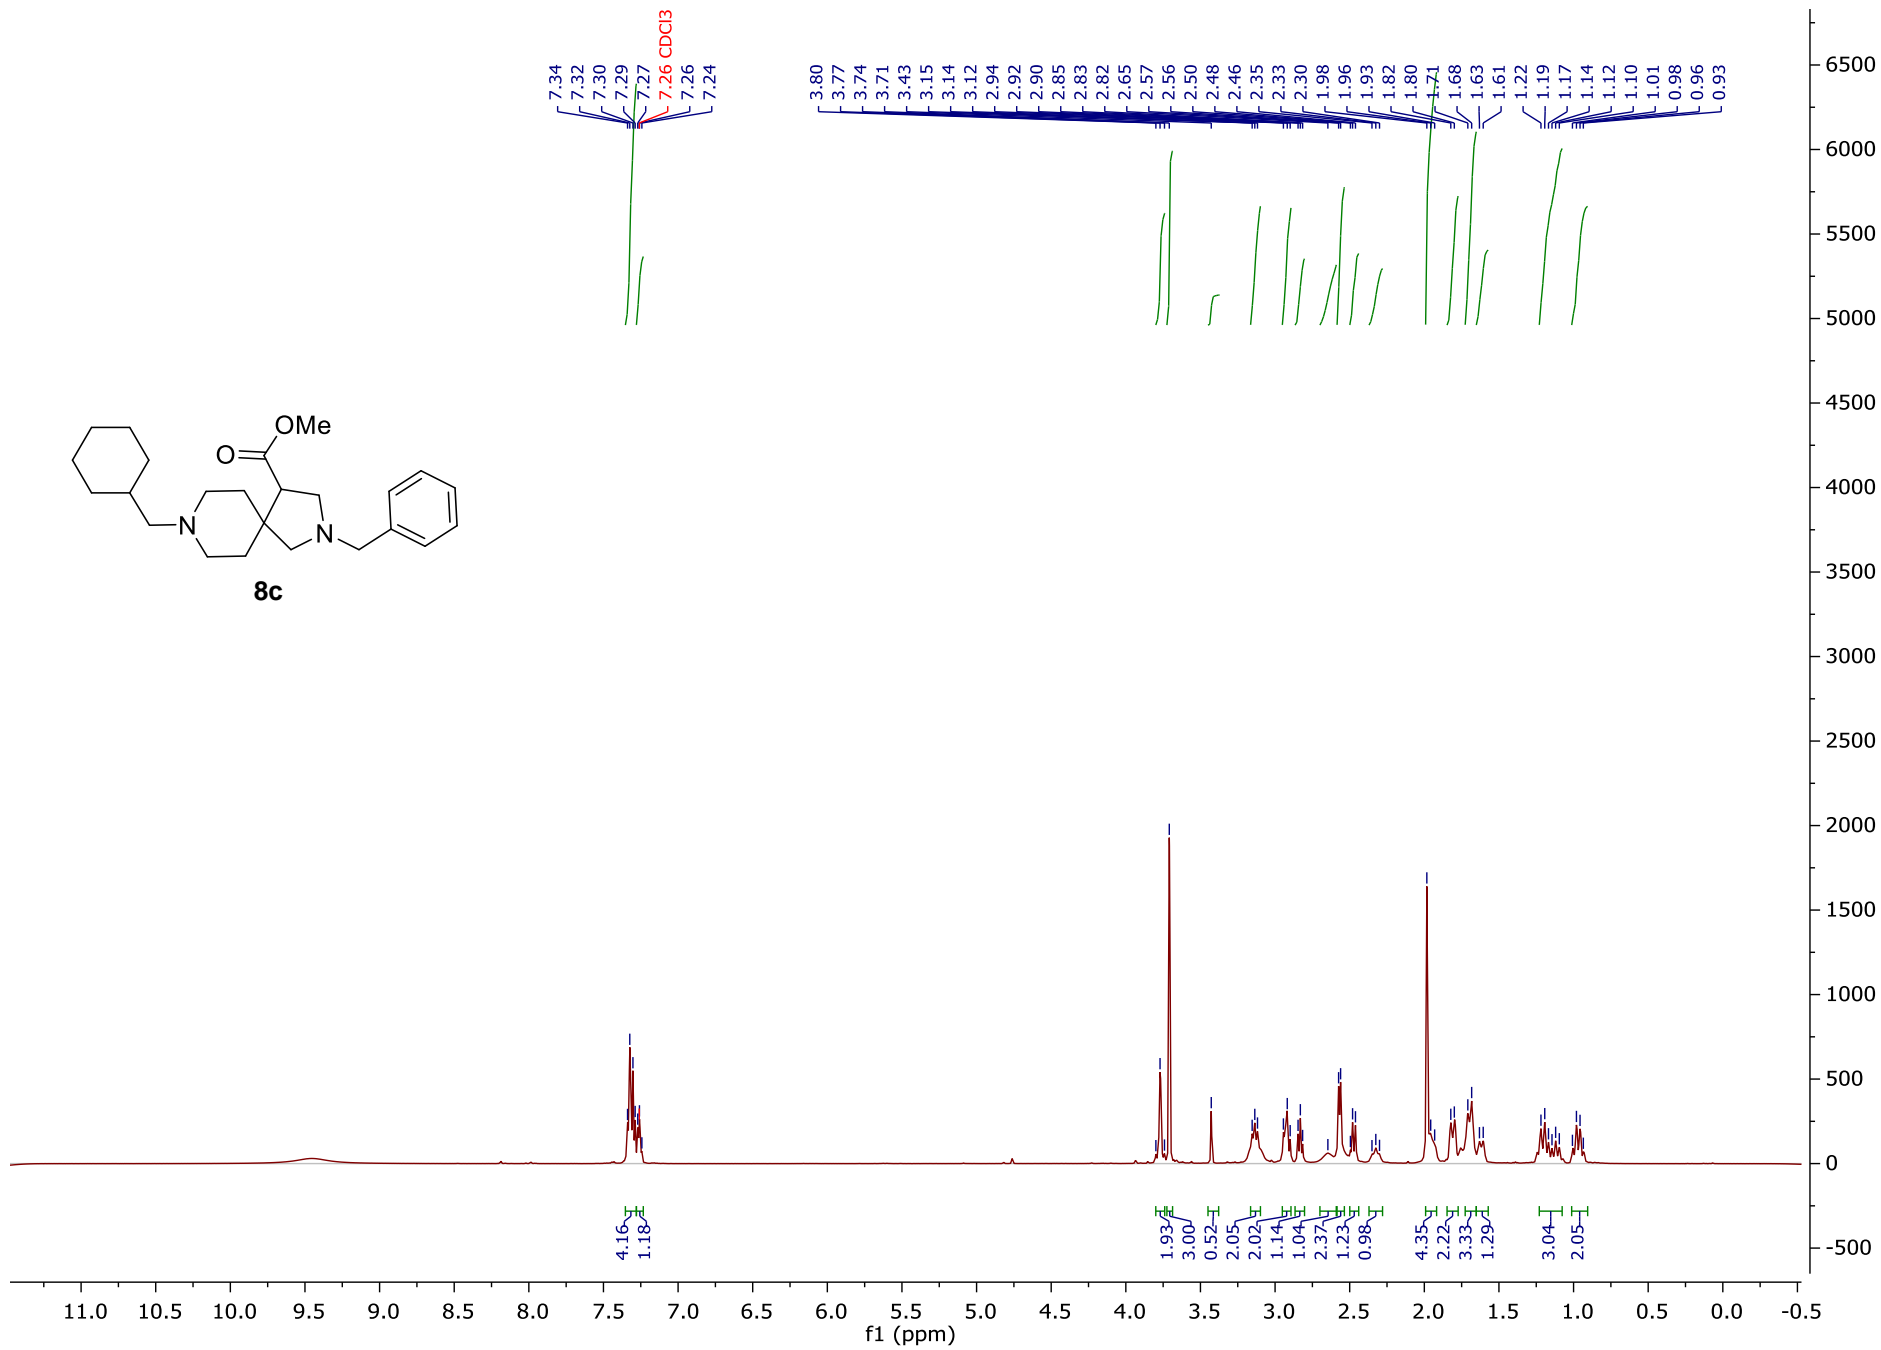

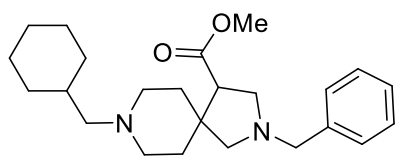

8c

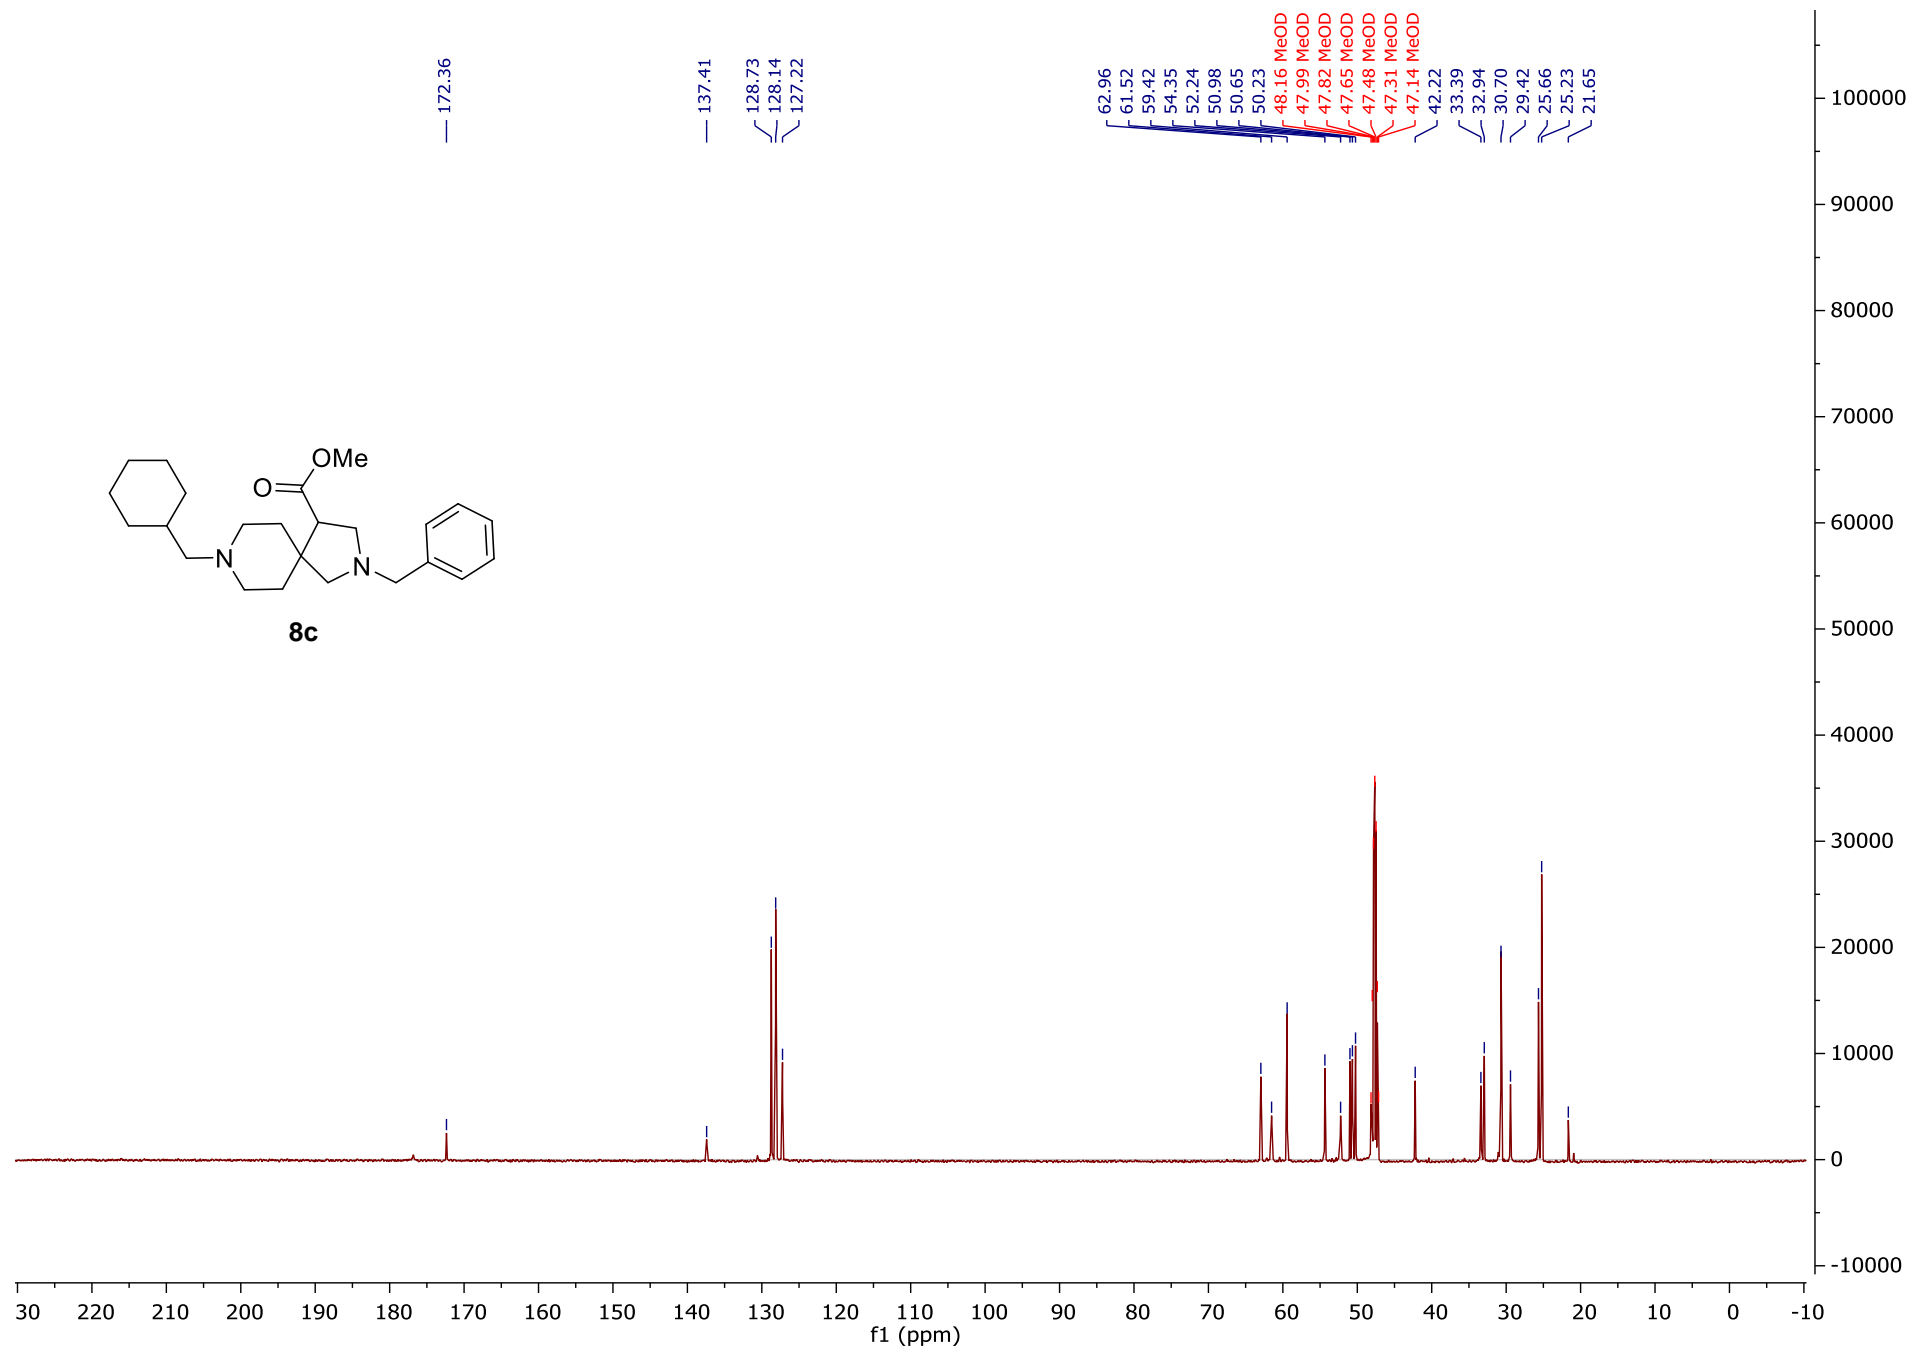

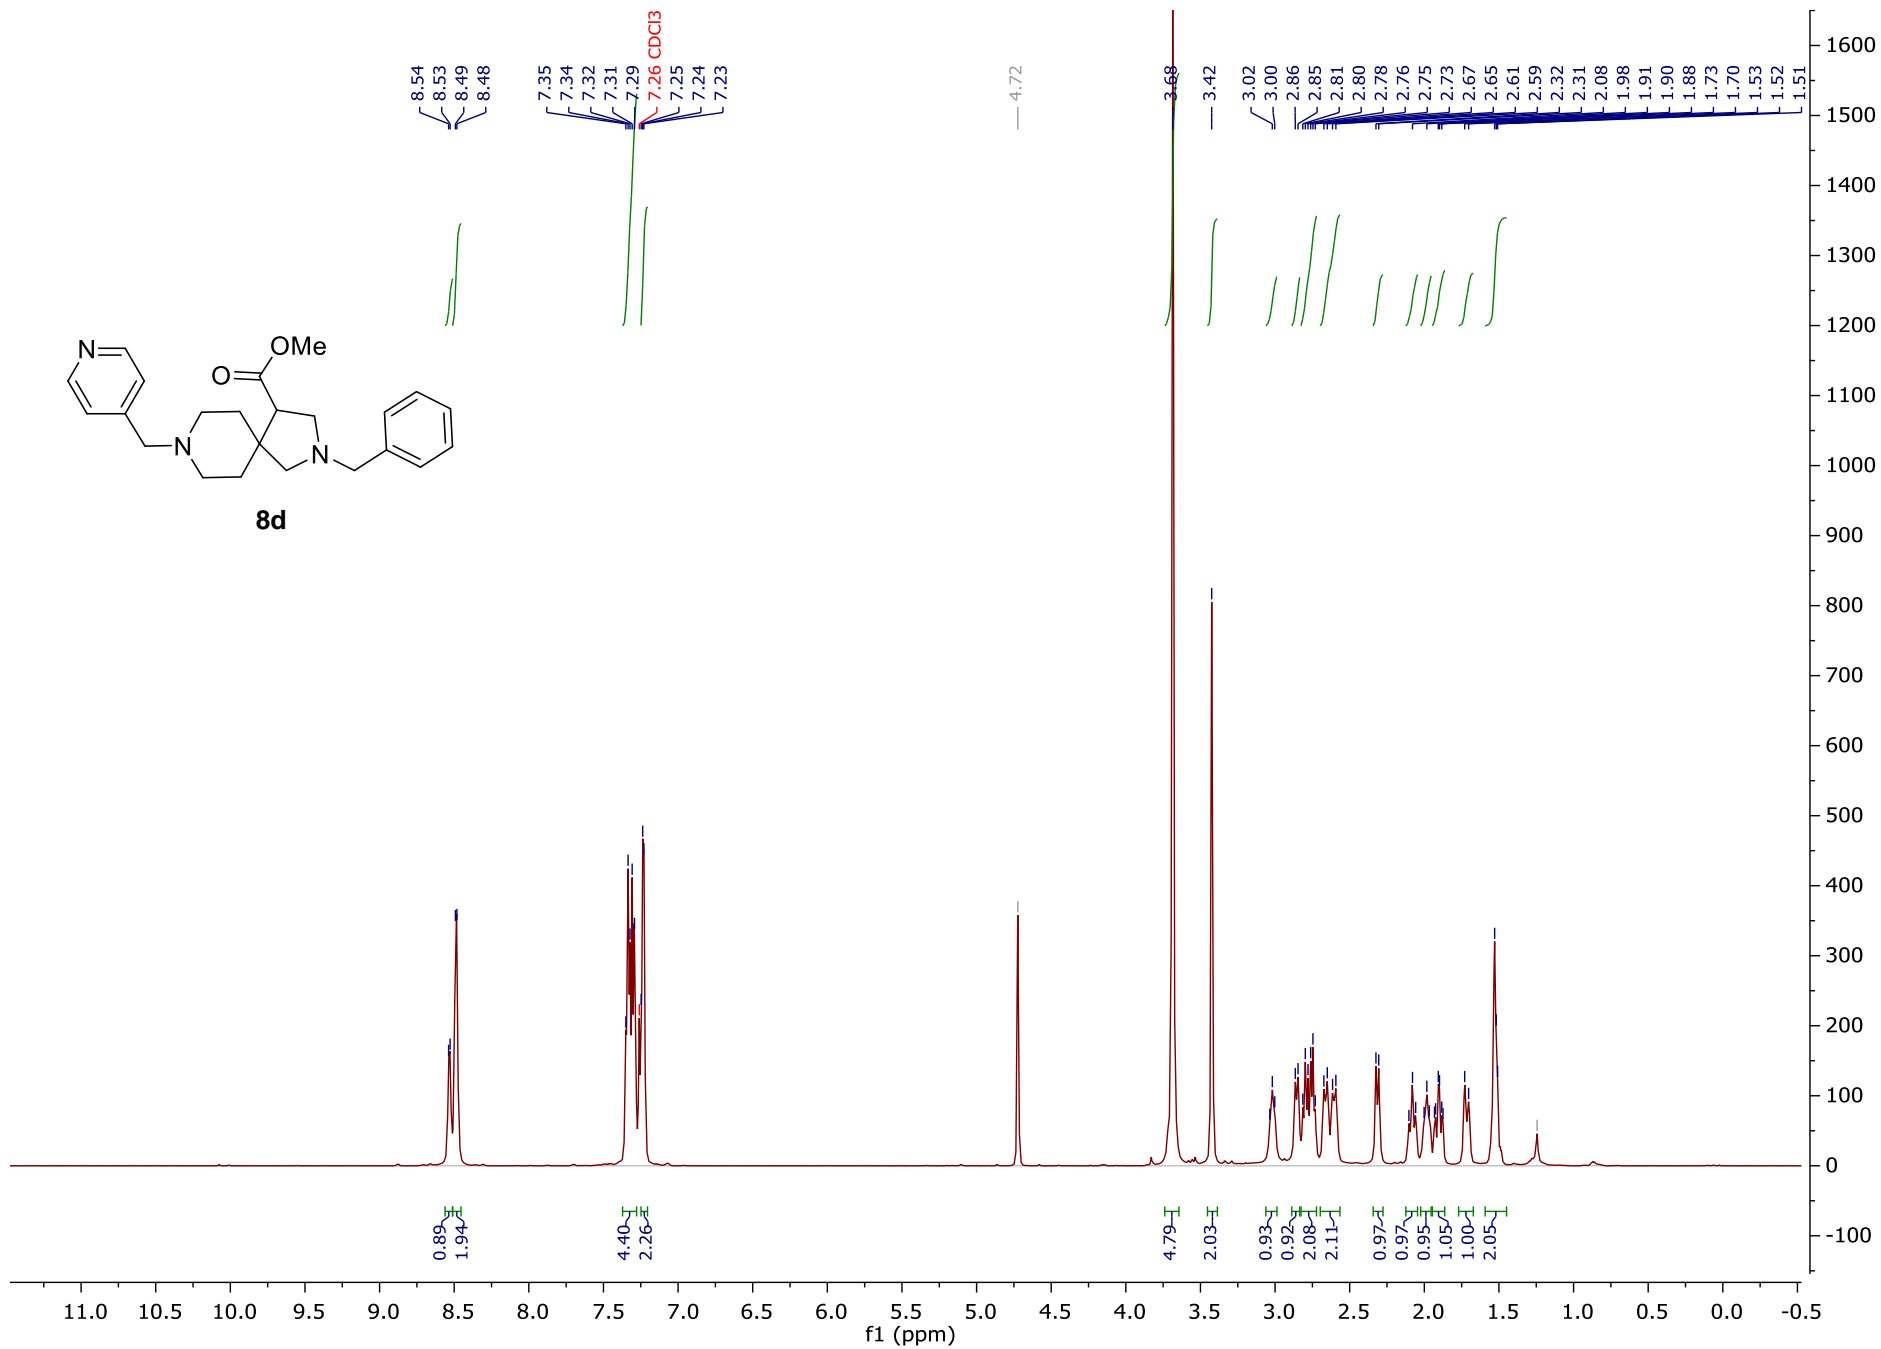

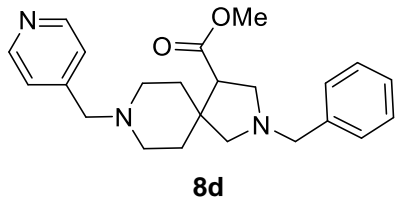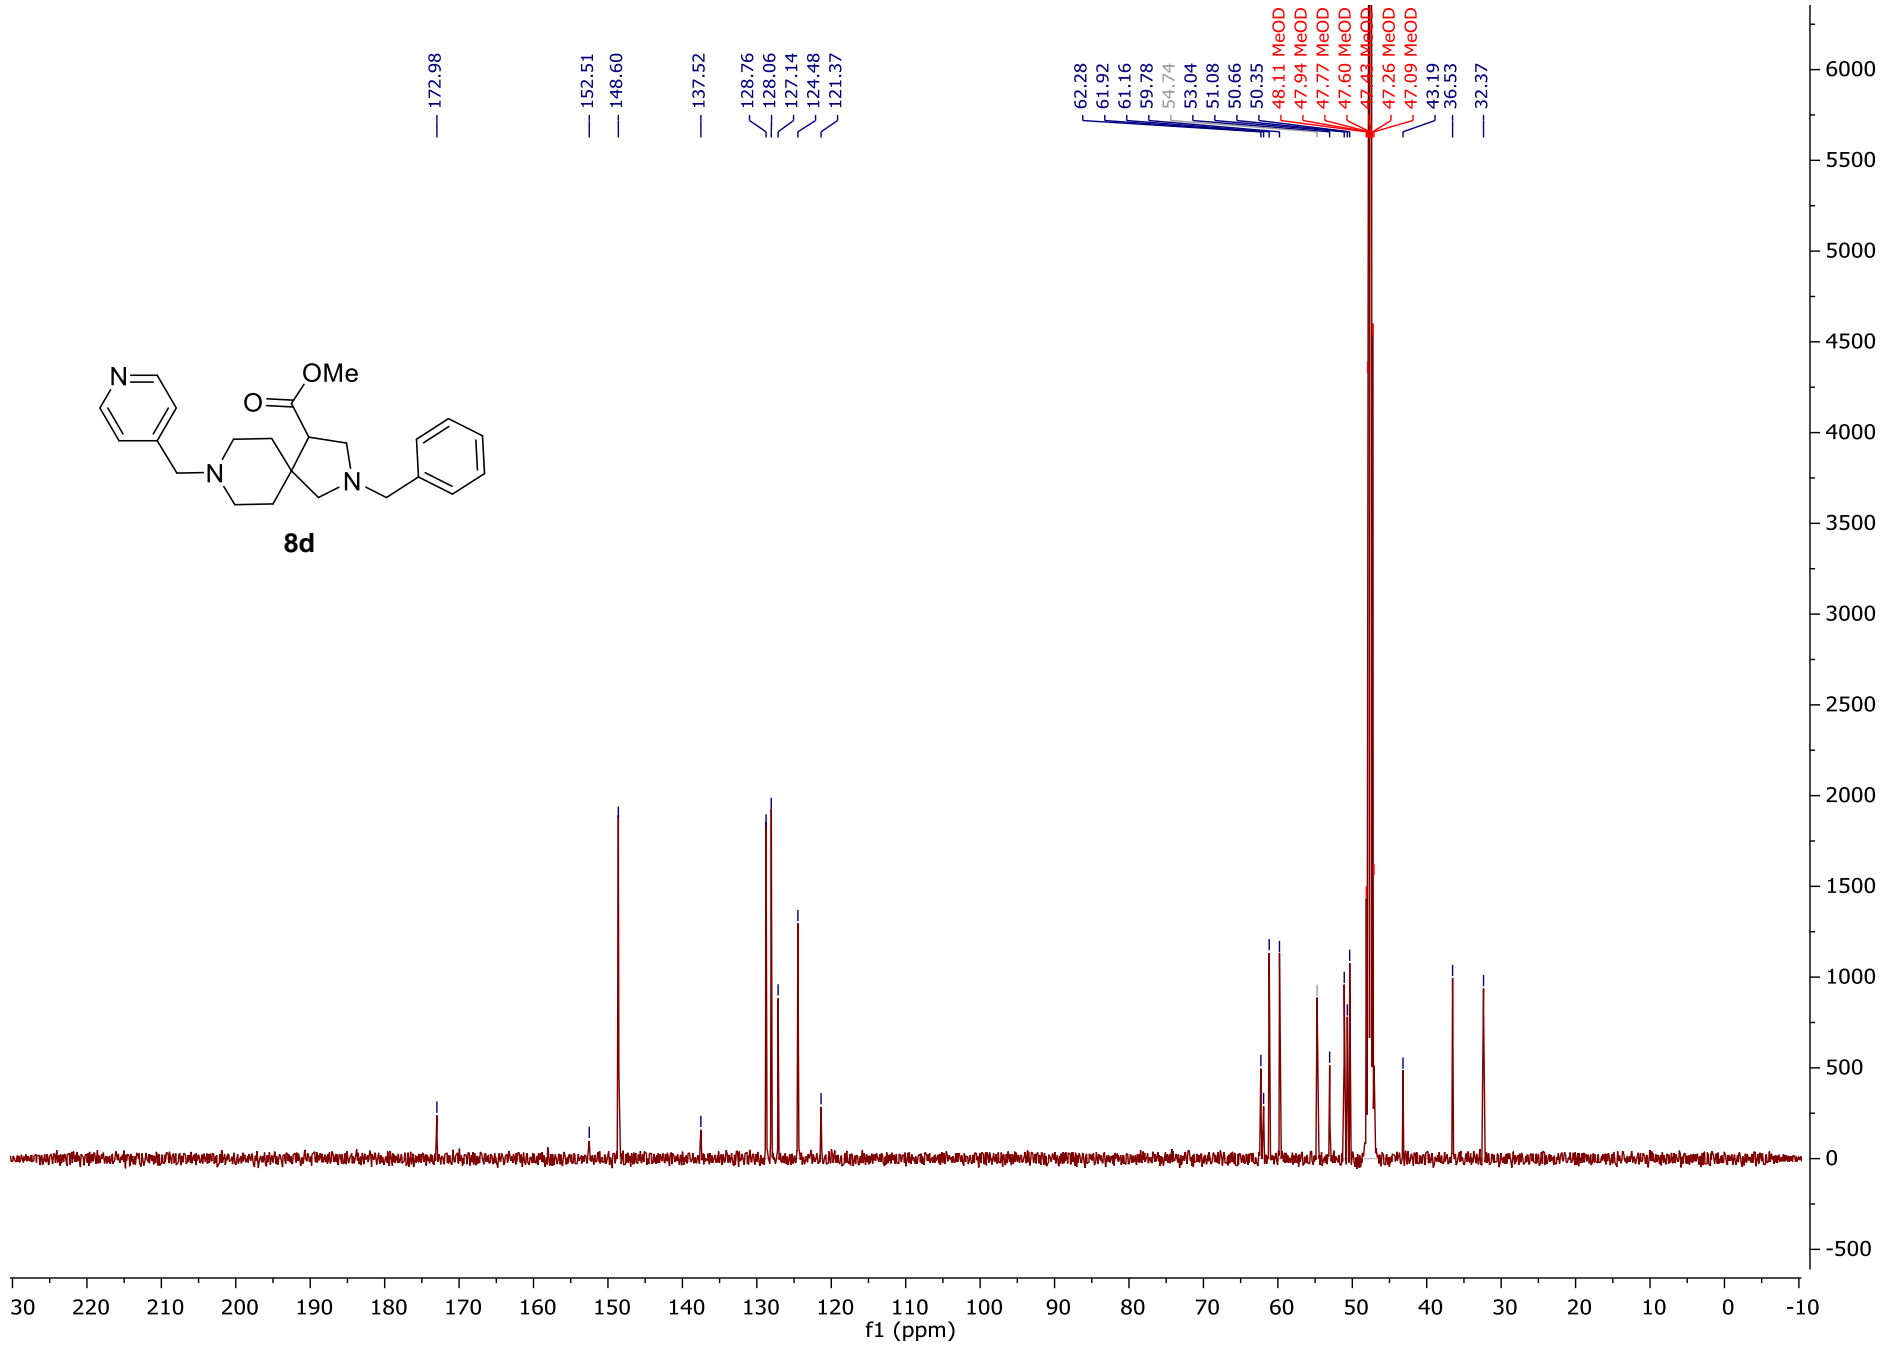

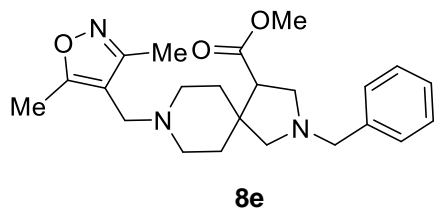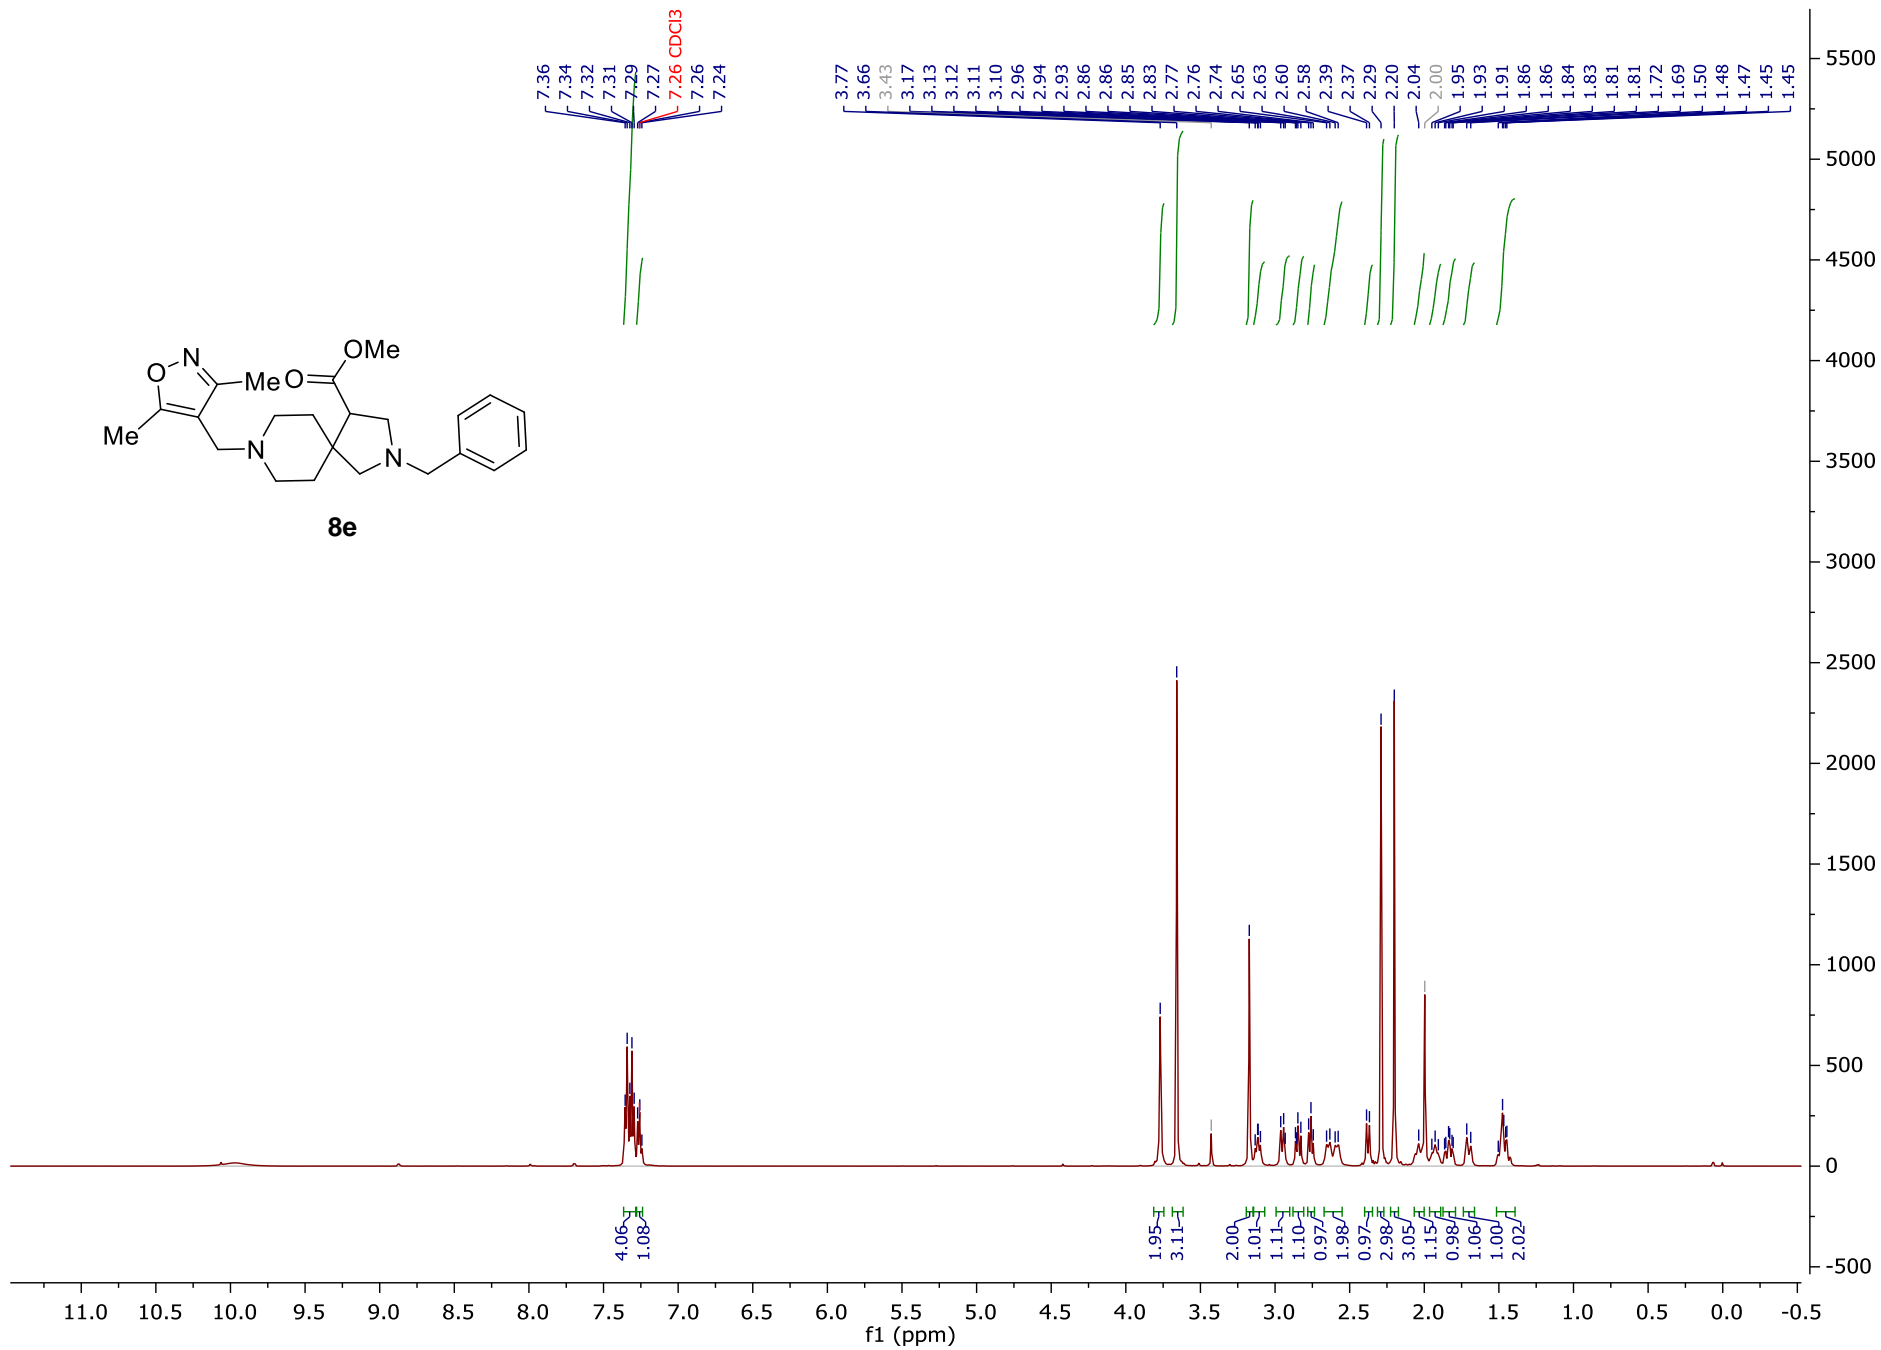

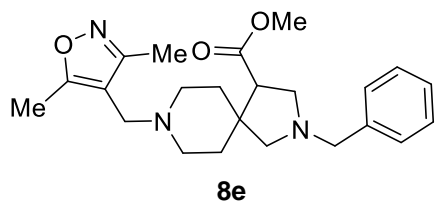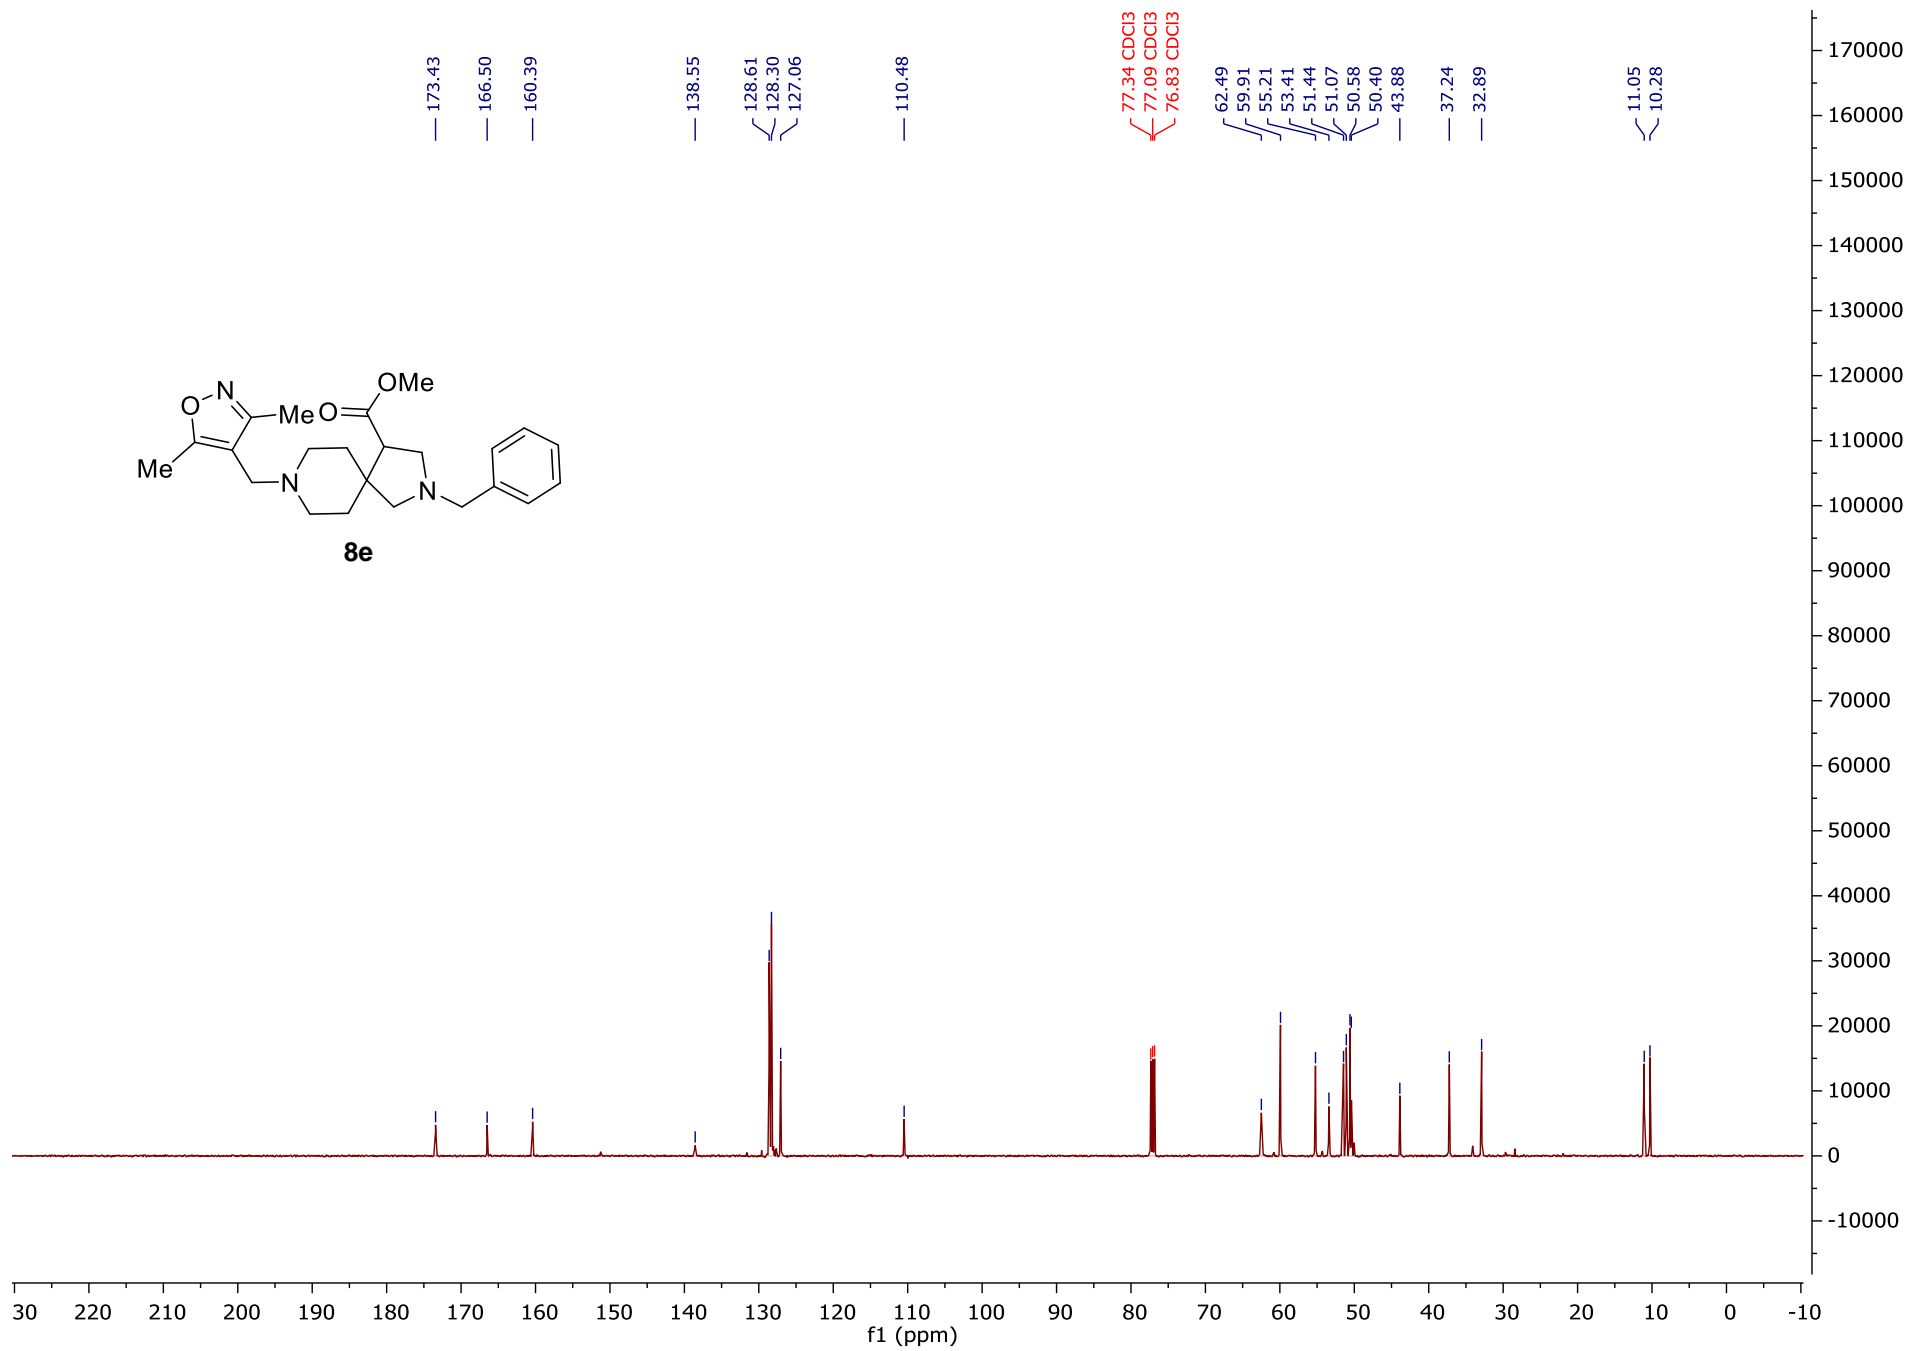



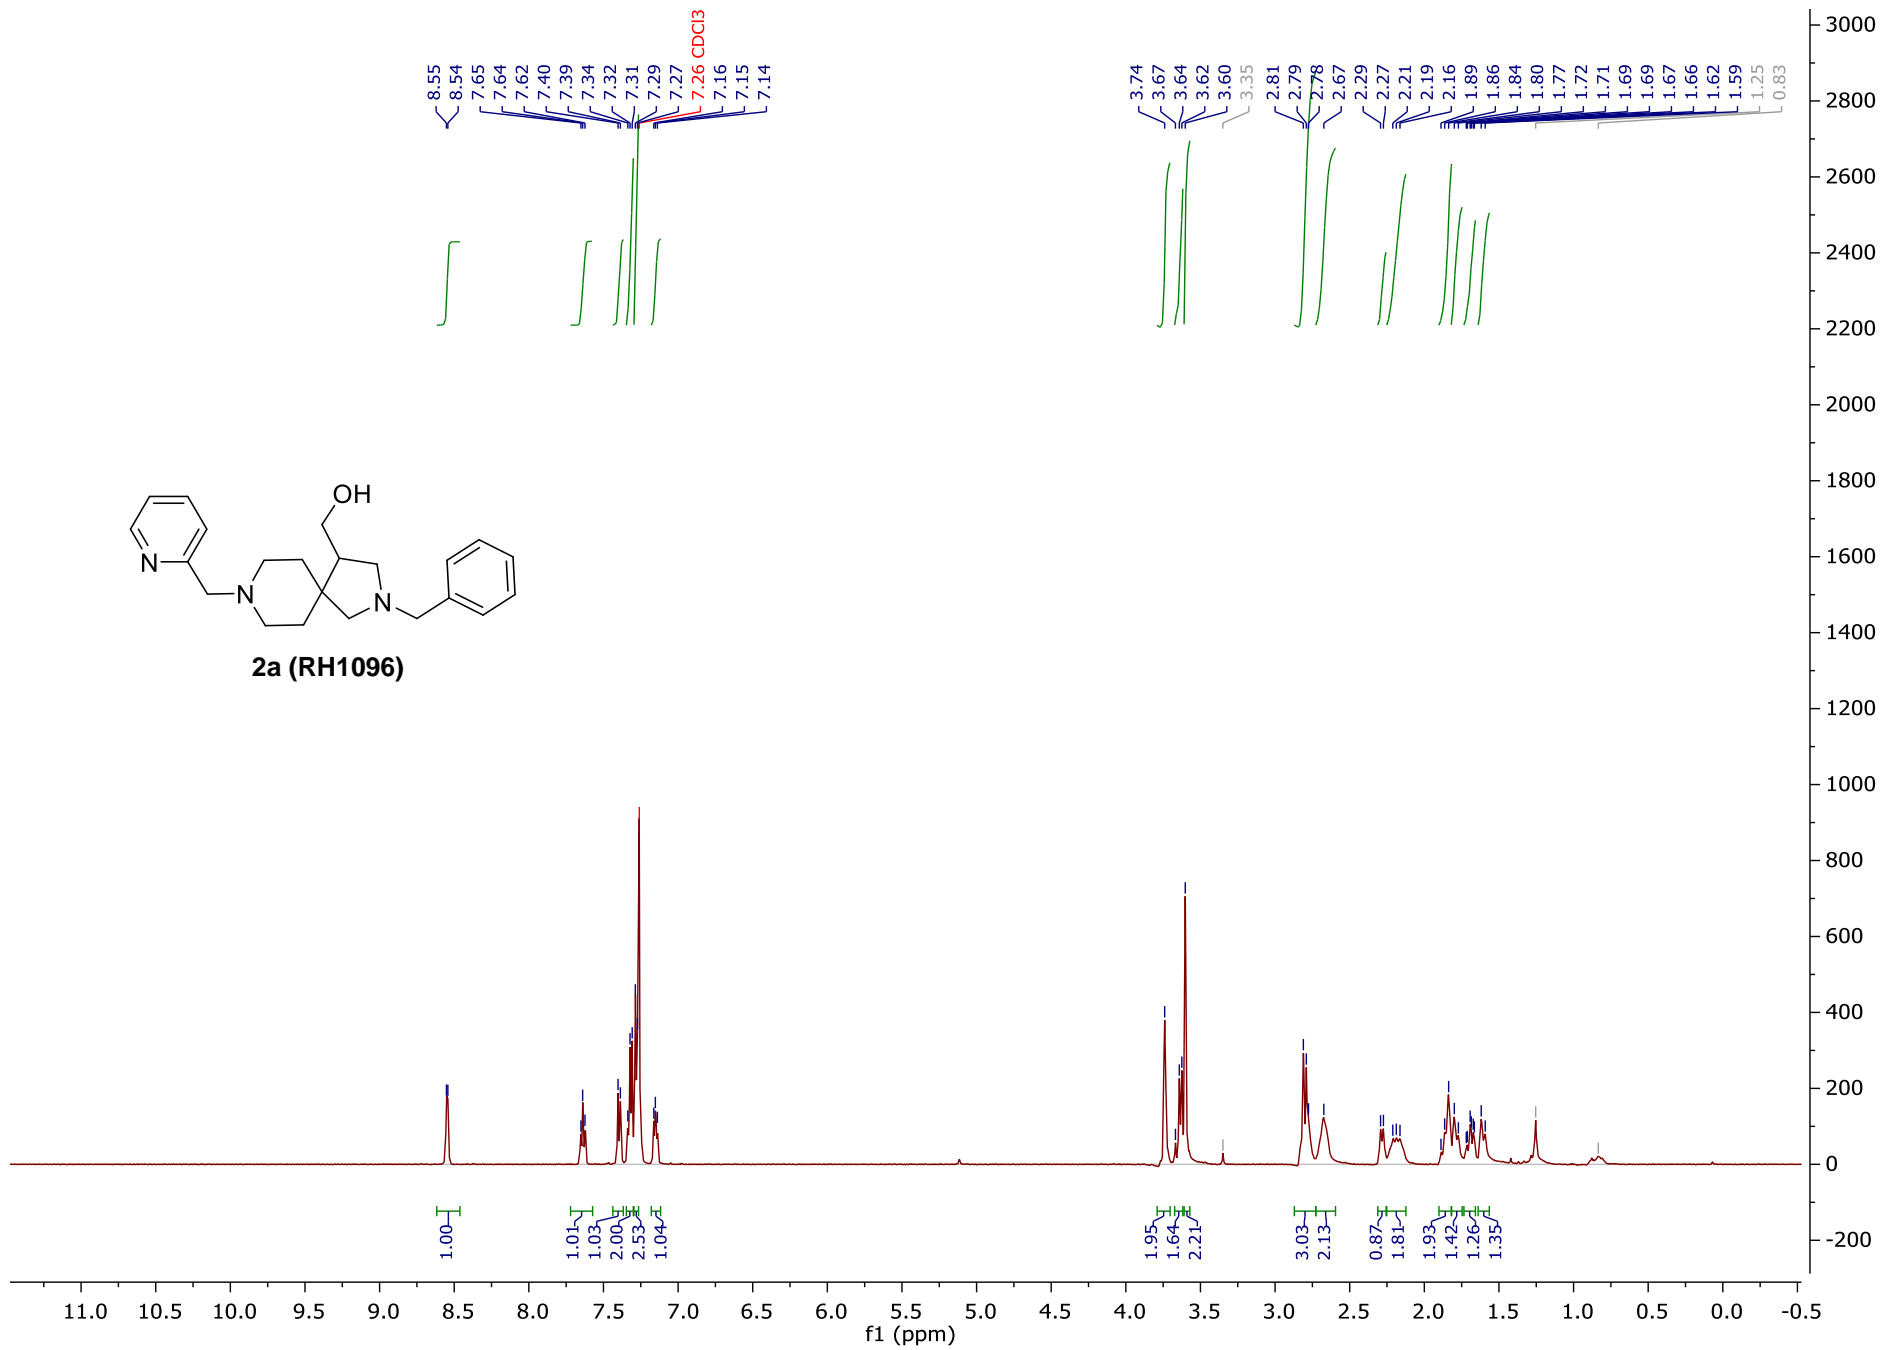

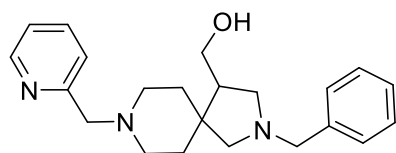

2a (RH1096)

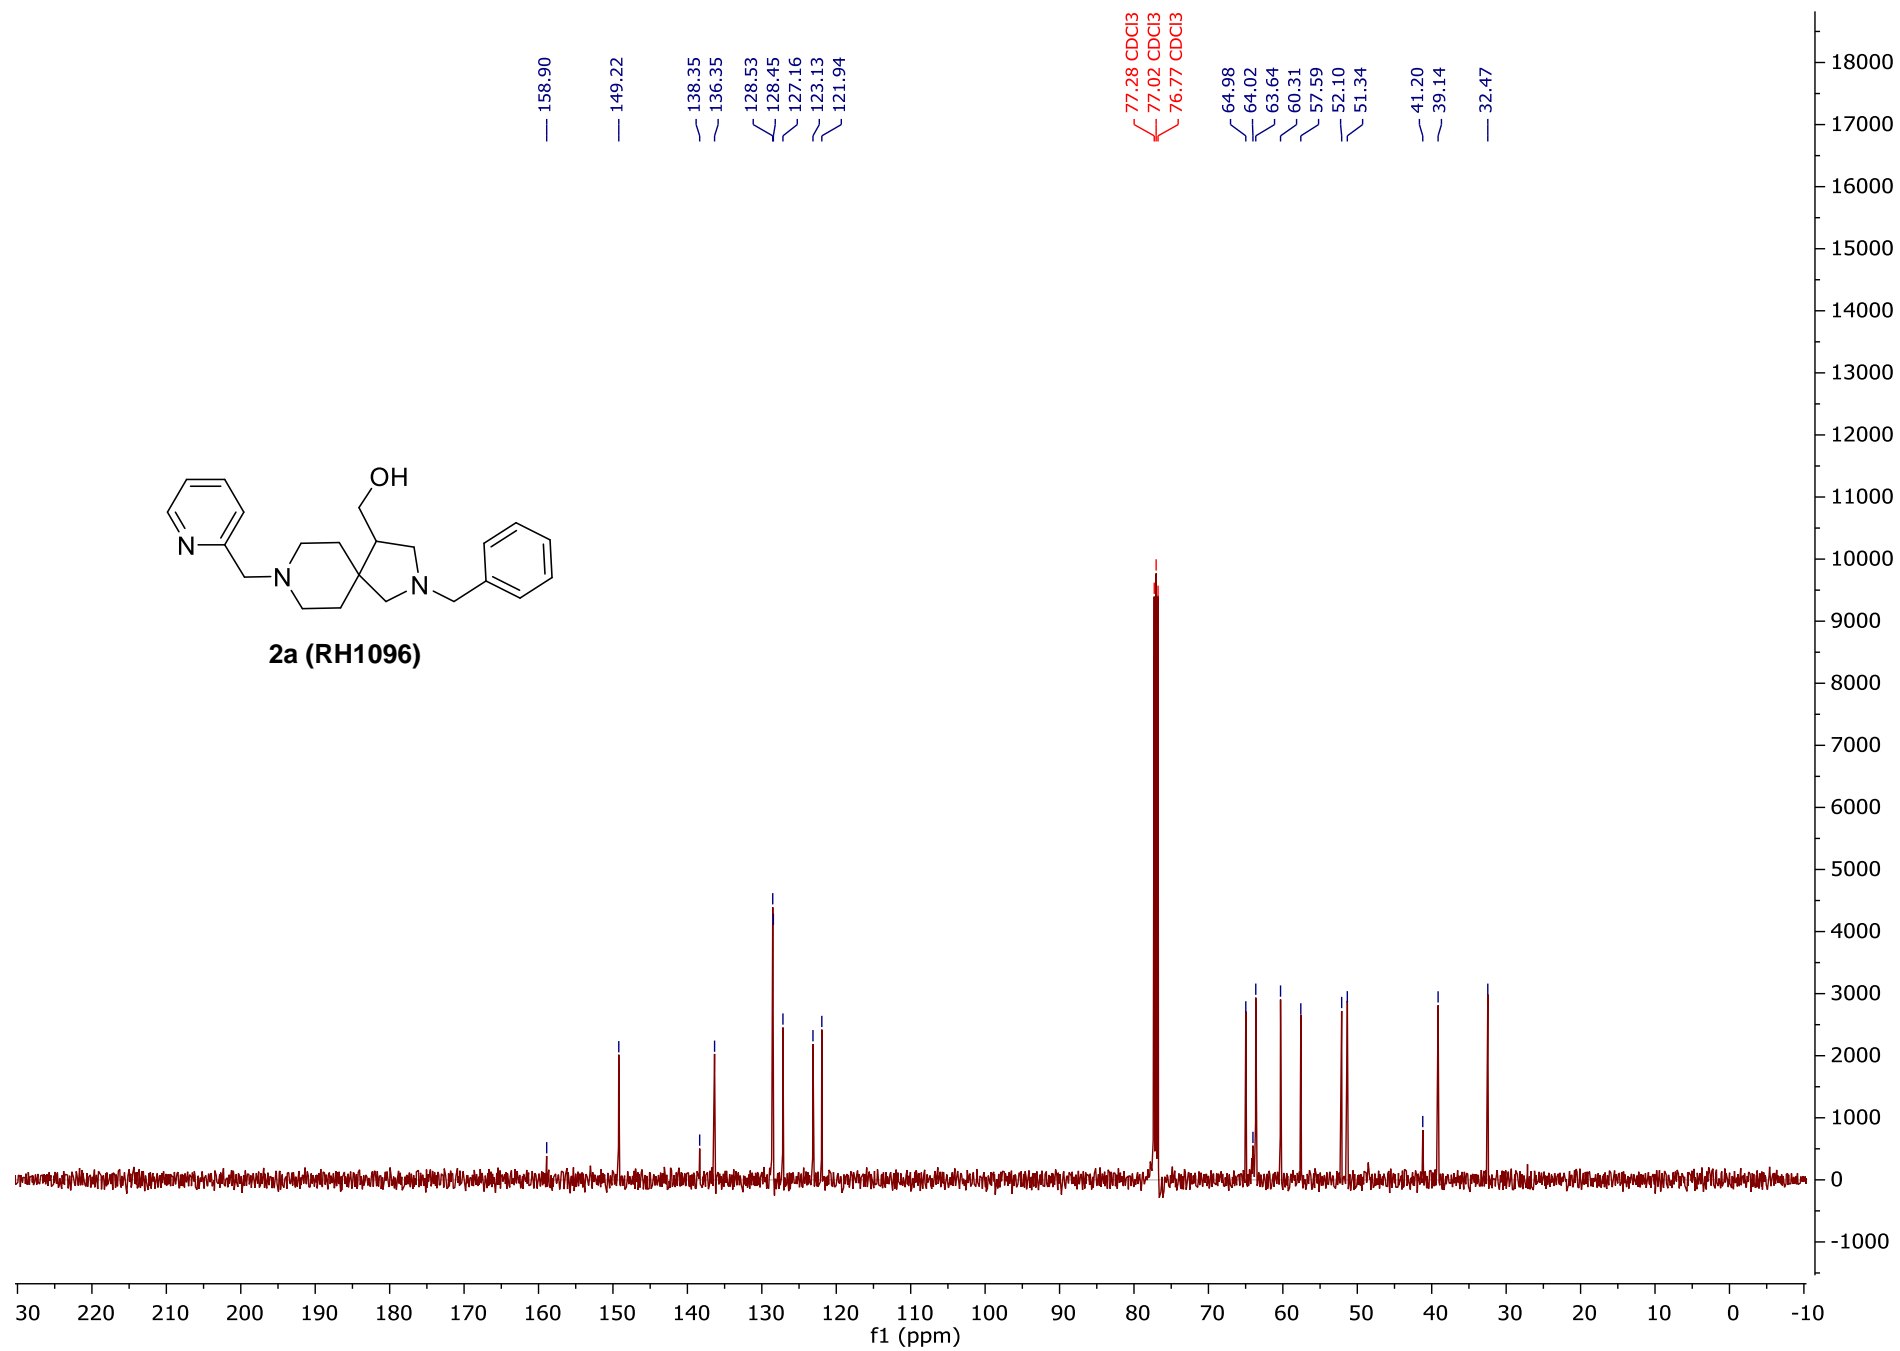

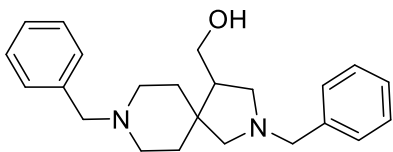

**2b (RH1103)**

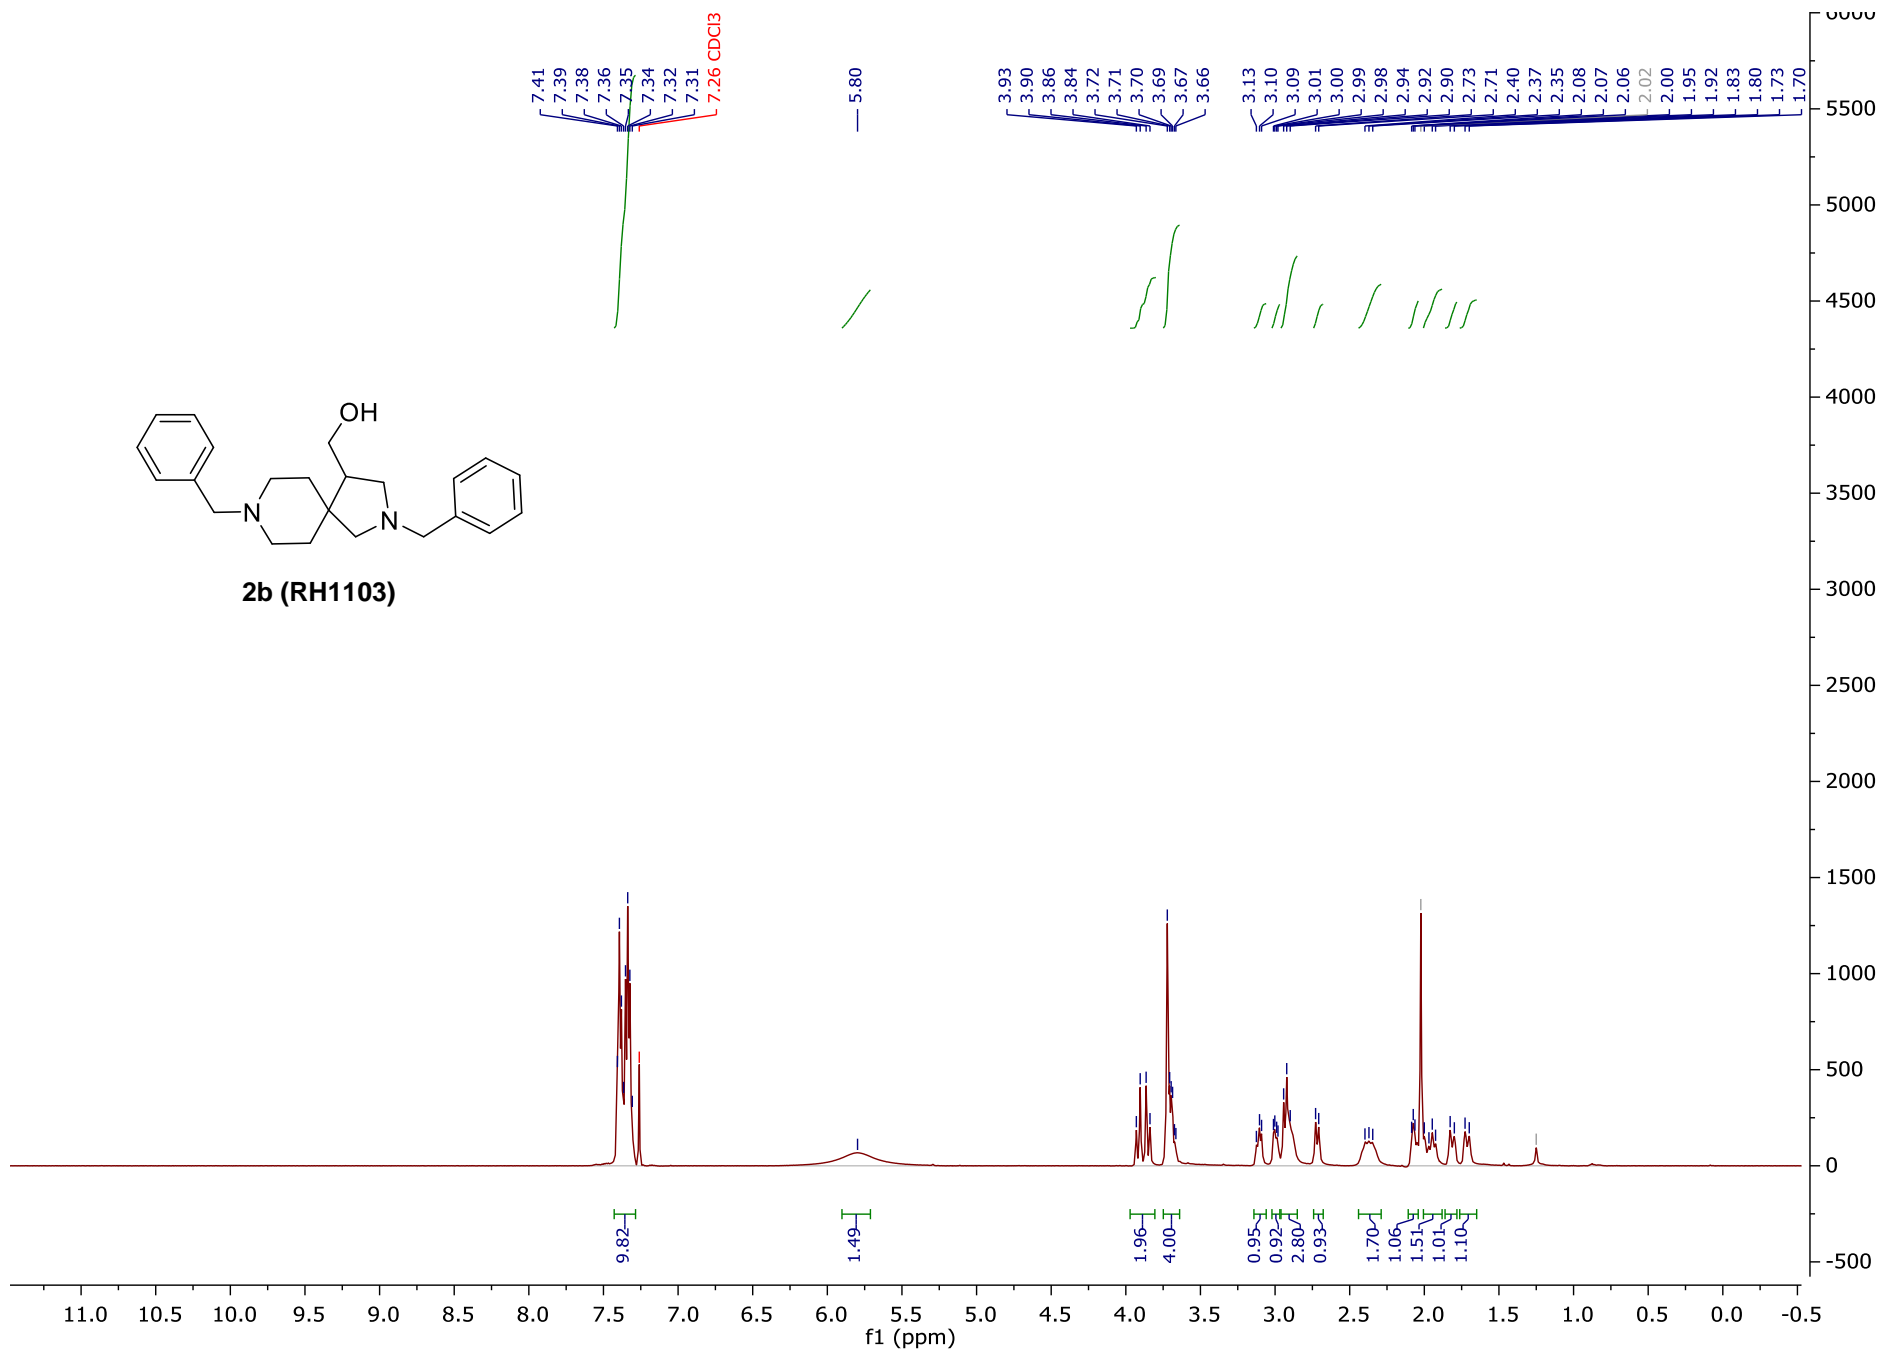

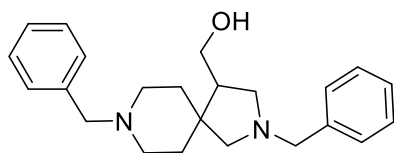

**2b (RH1103)**

132.72  
129.79  
129.17  
128.26  
128.17  
128.10  
127.79  
127.70

62.84  
61.98  
60.45  
59.82  
56.27  
50.56  
50.07  
48.85  
48.11 MeOD  
47.94 MeOD  
47.77 MeOD  
47.60 MeOD  
47.43 MeOD  
47.26 MeOD  
47.09 MeOD  
40.91  
35.71  
29.84  
29.34

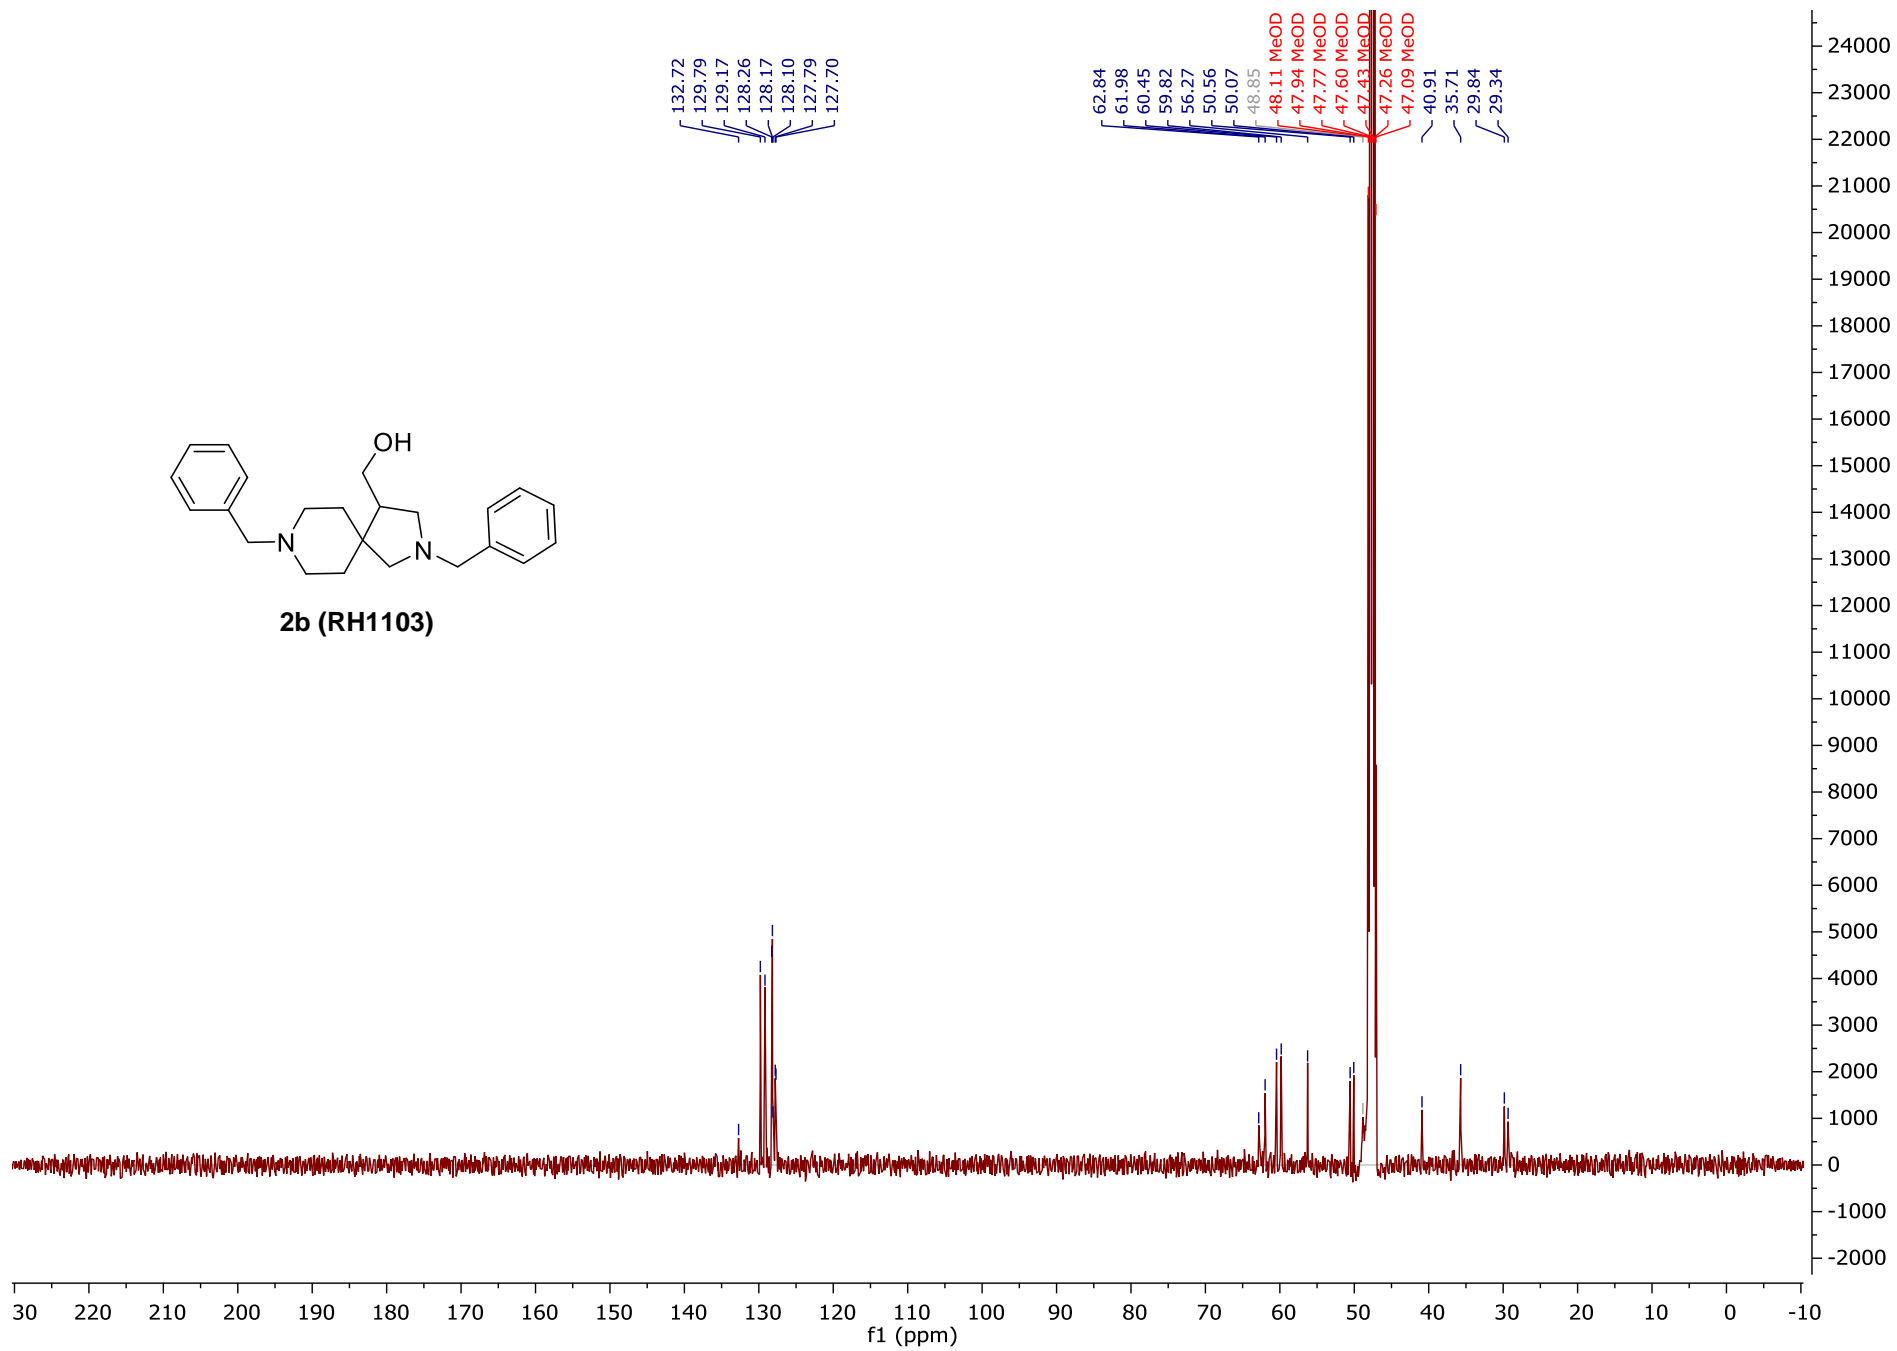

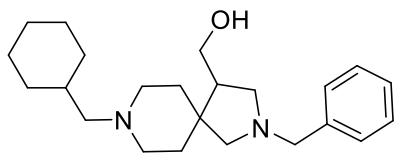

**2c (RH1115)**

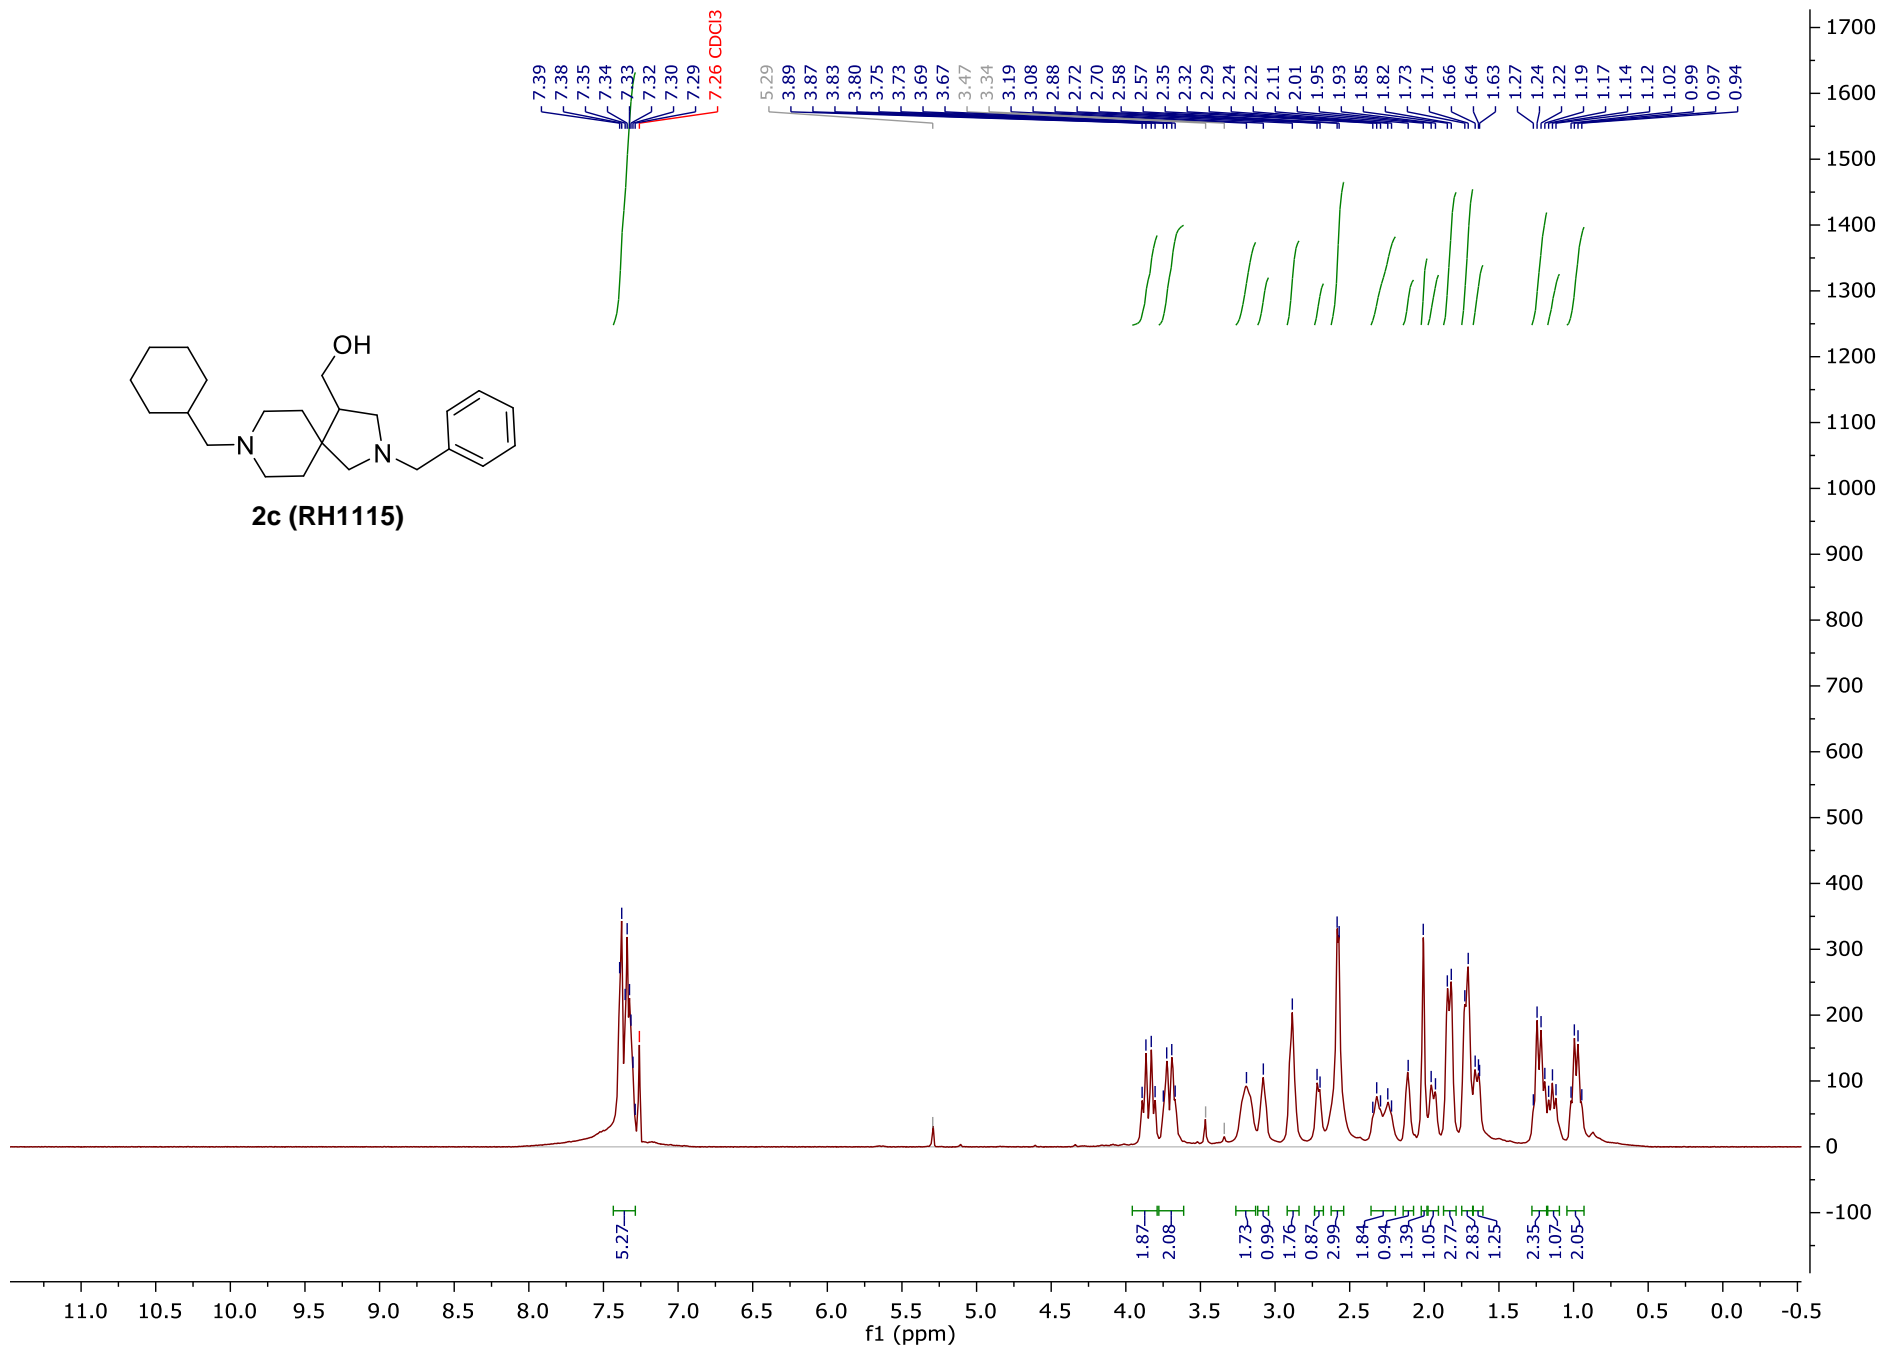

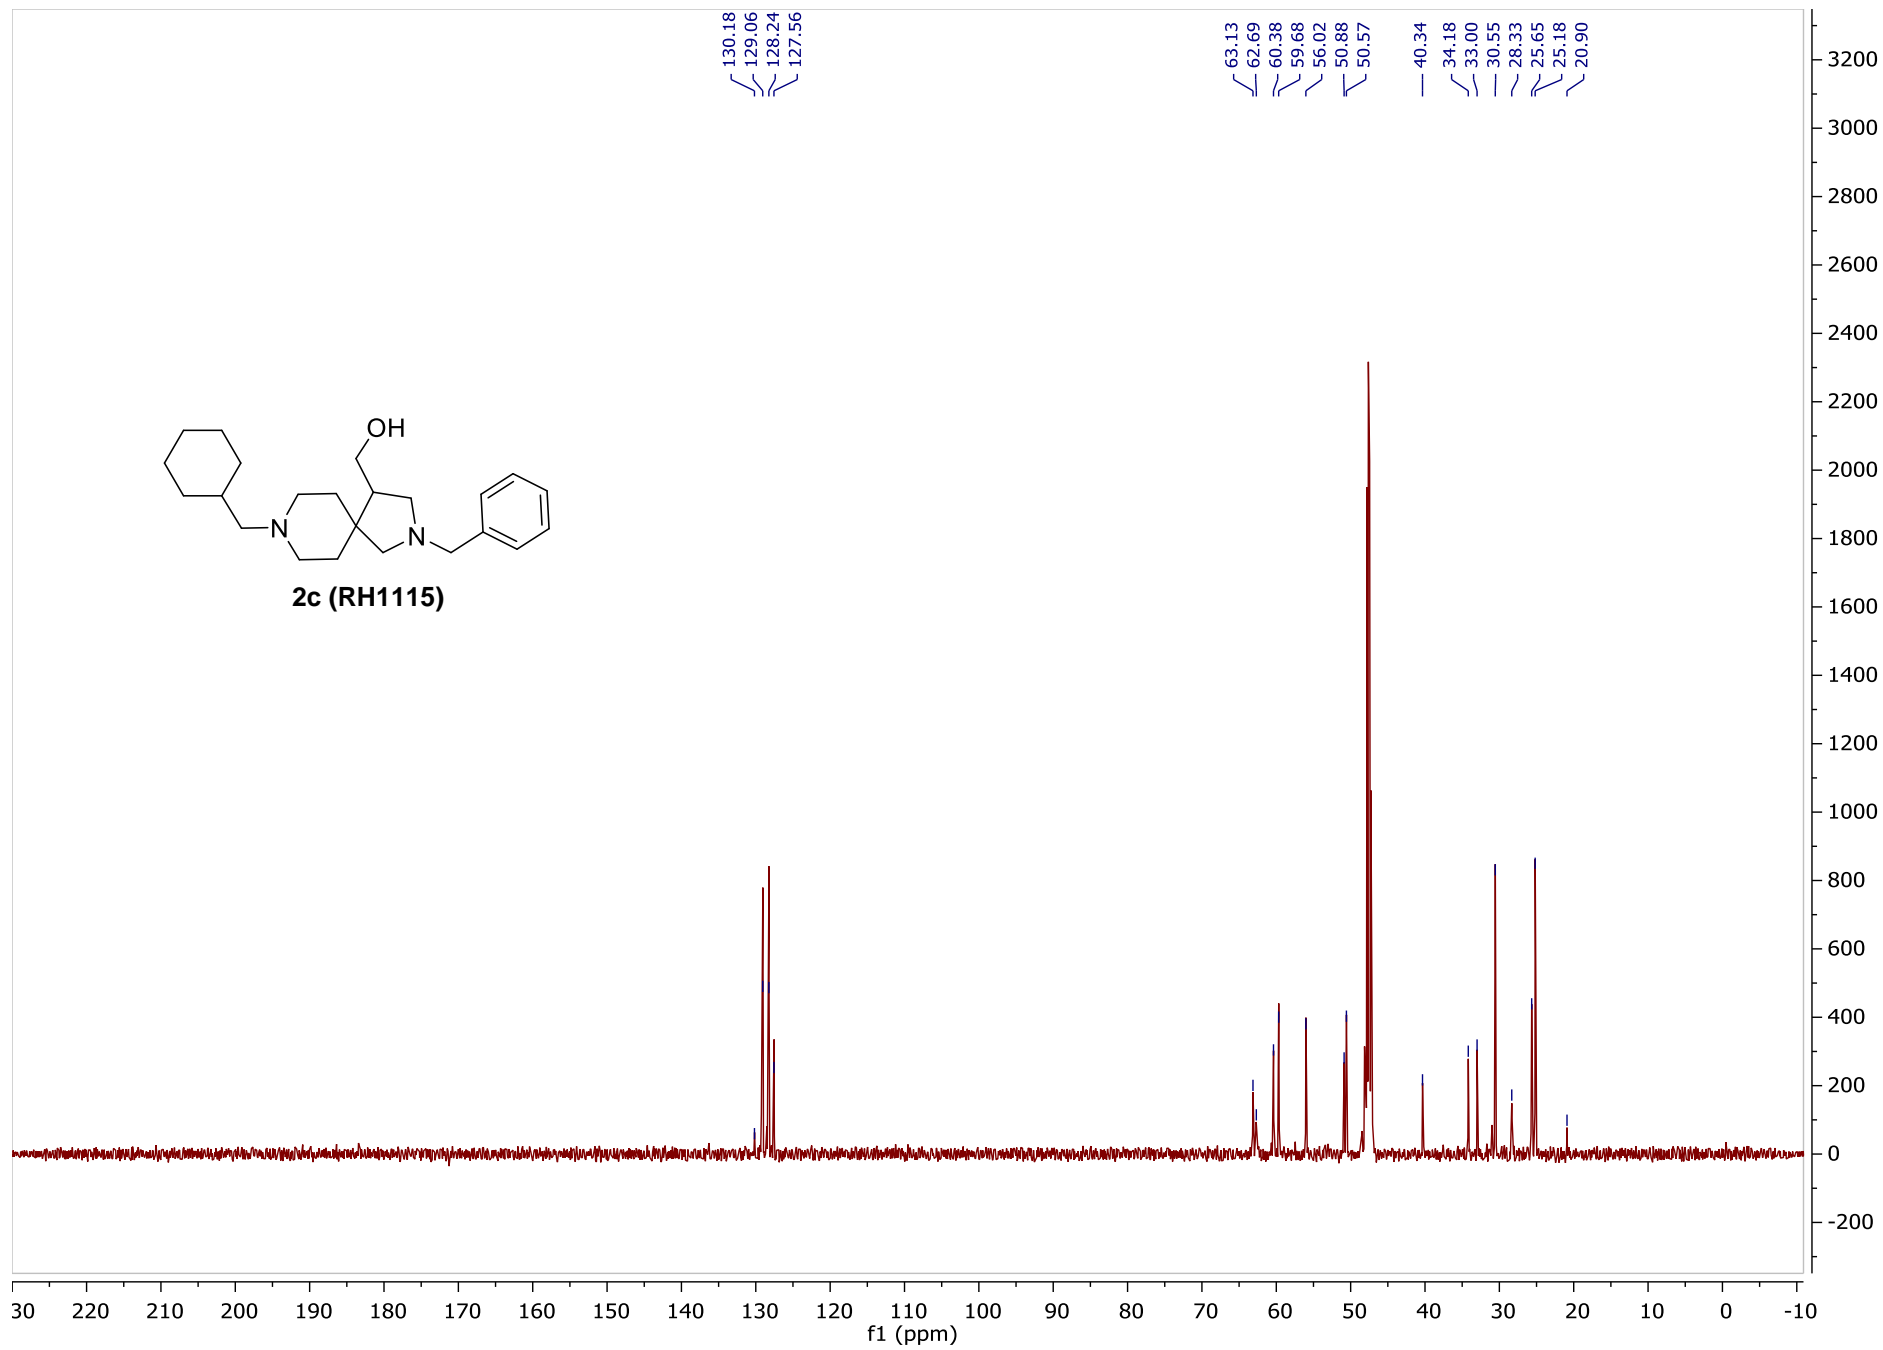

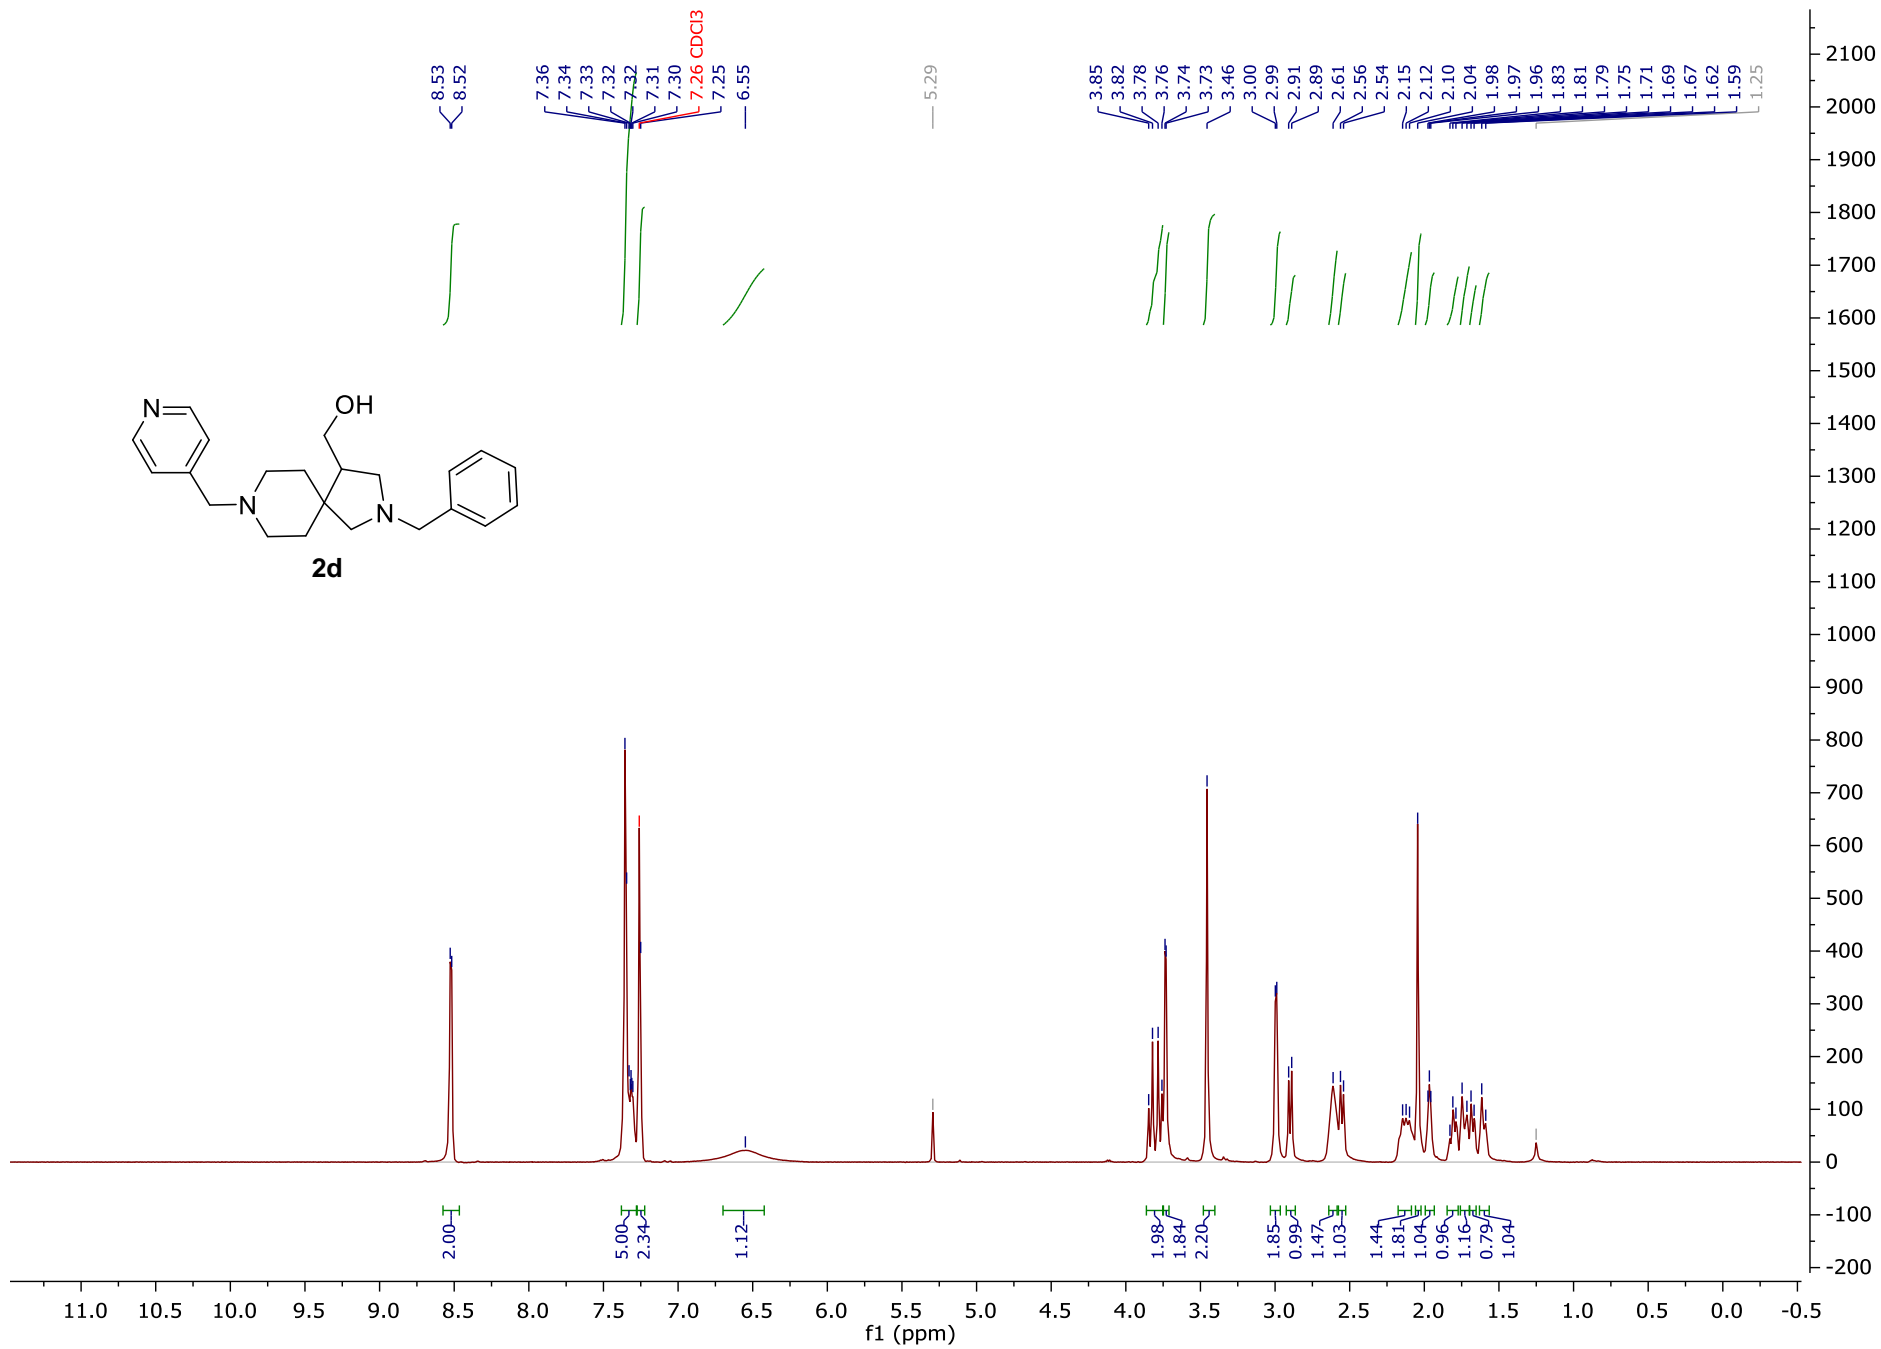

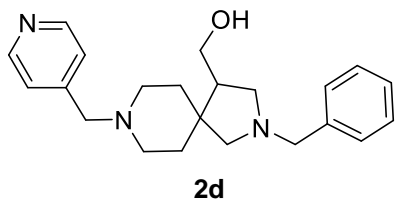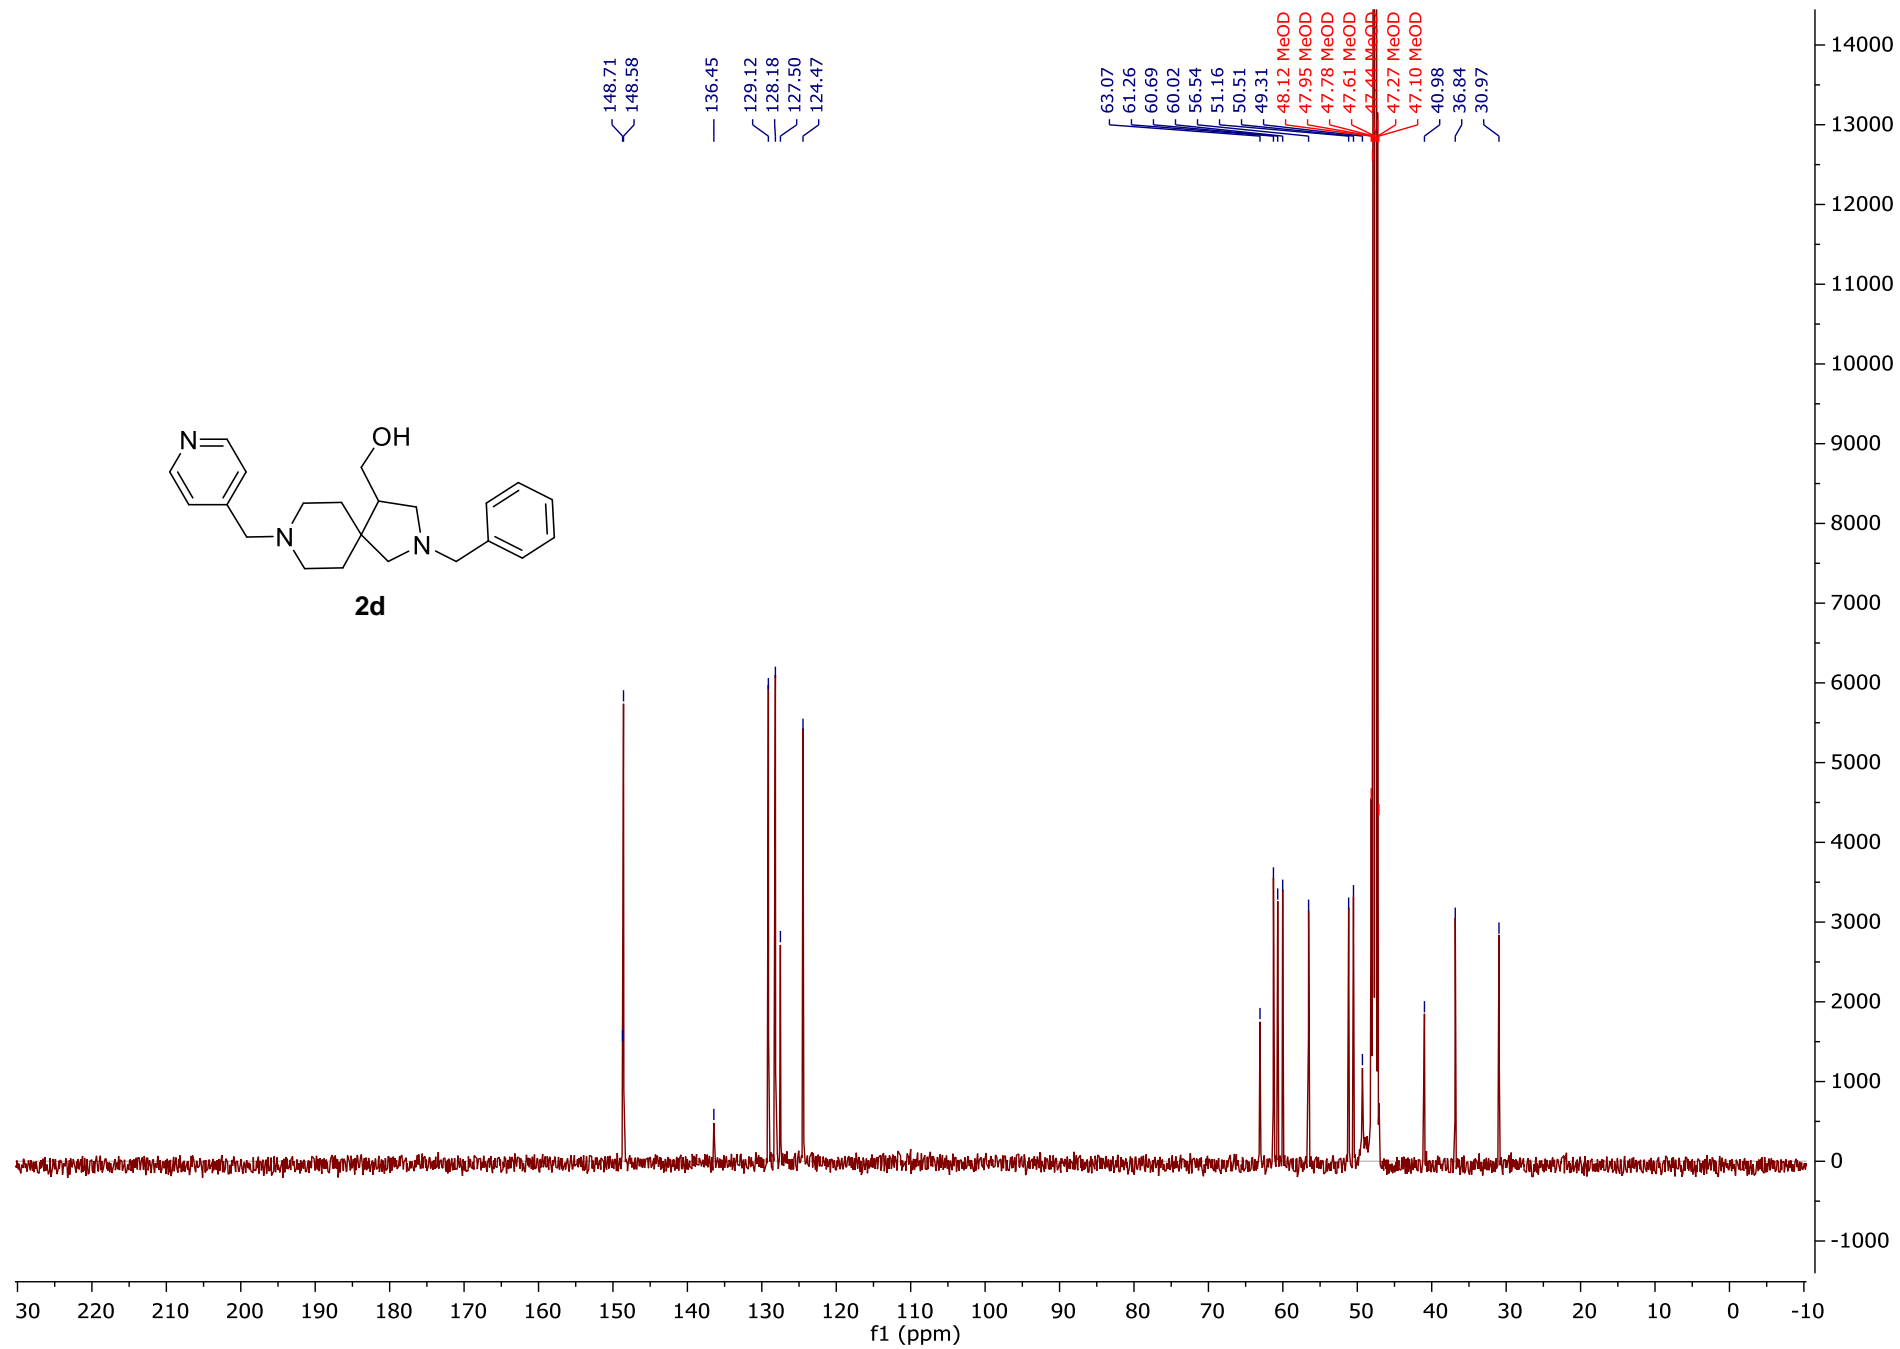



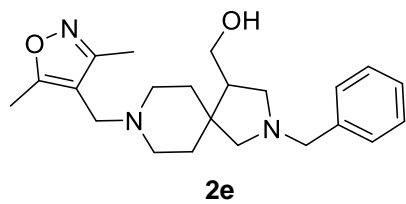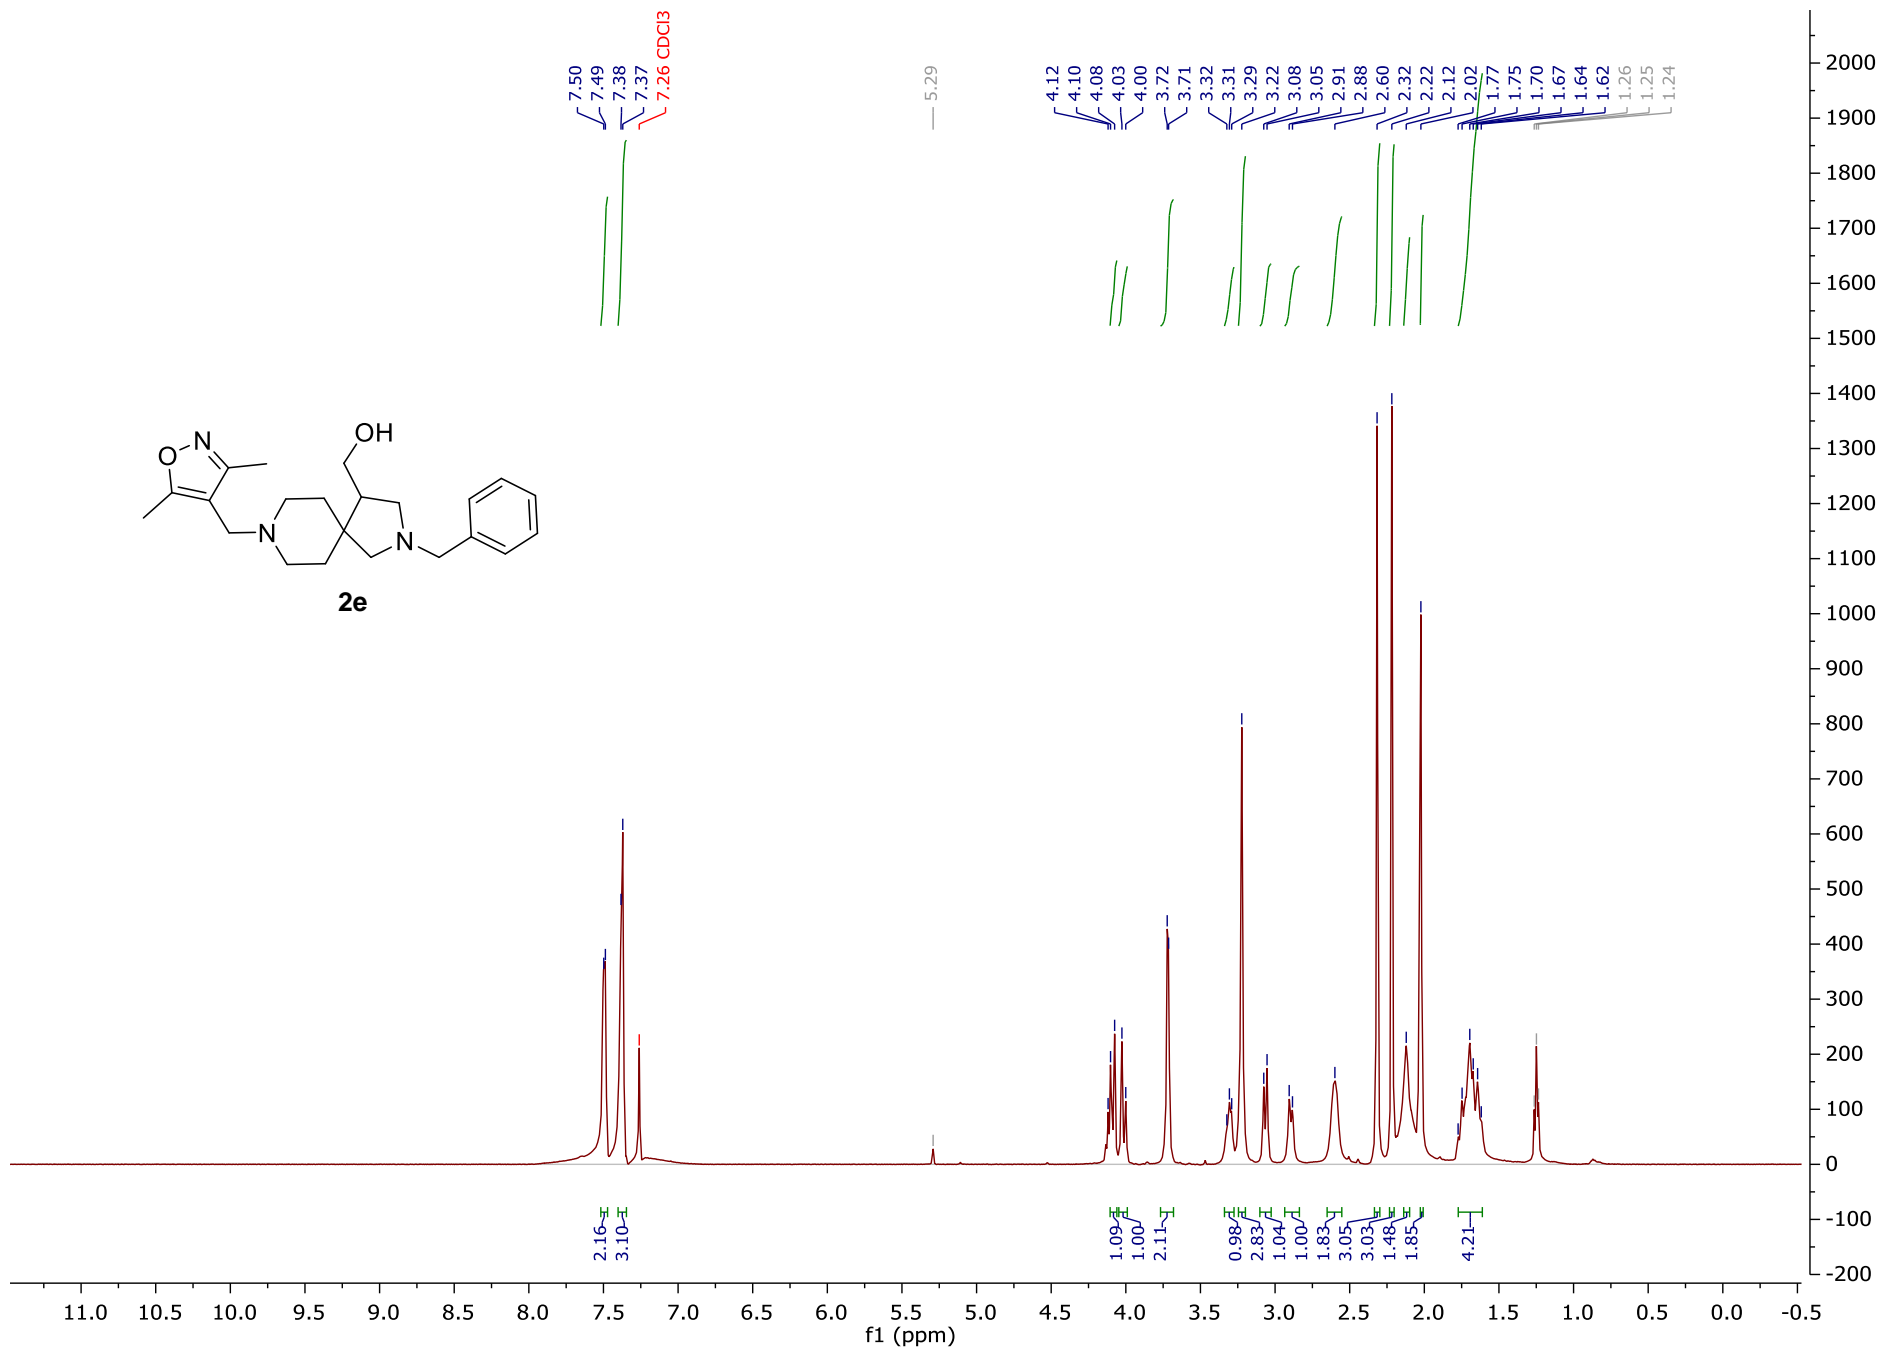

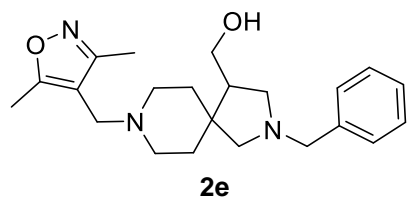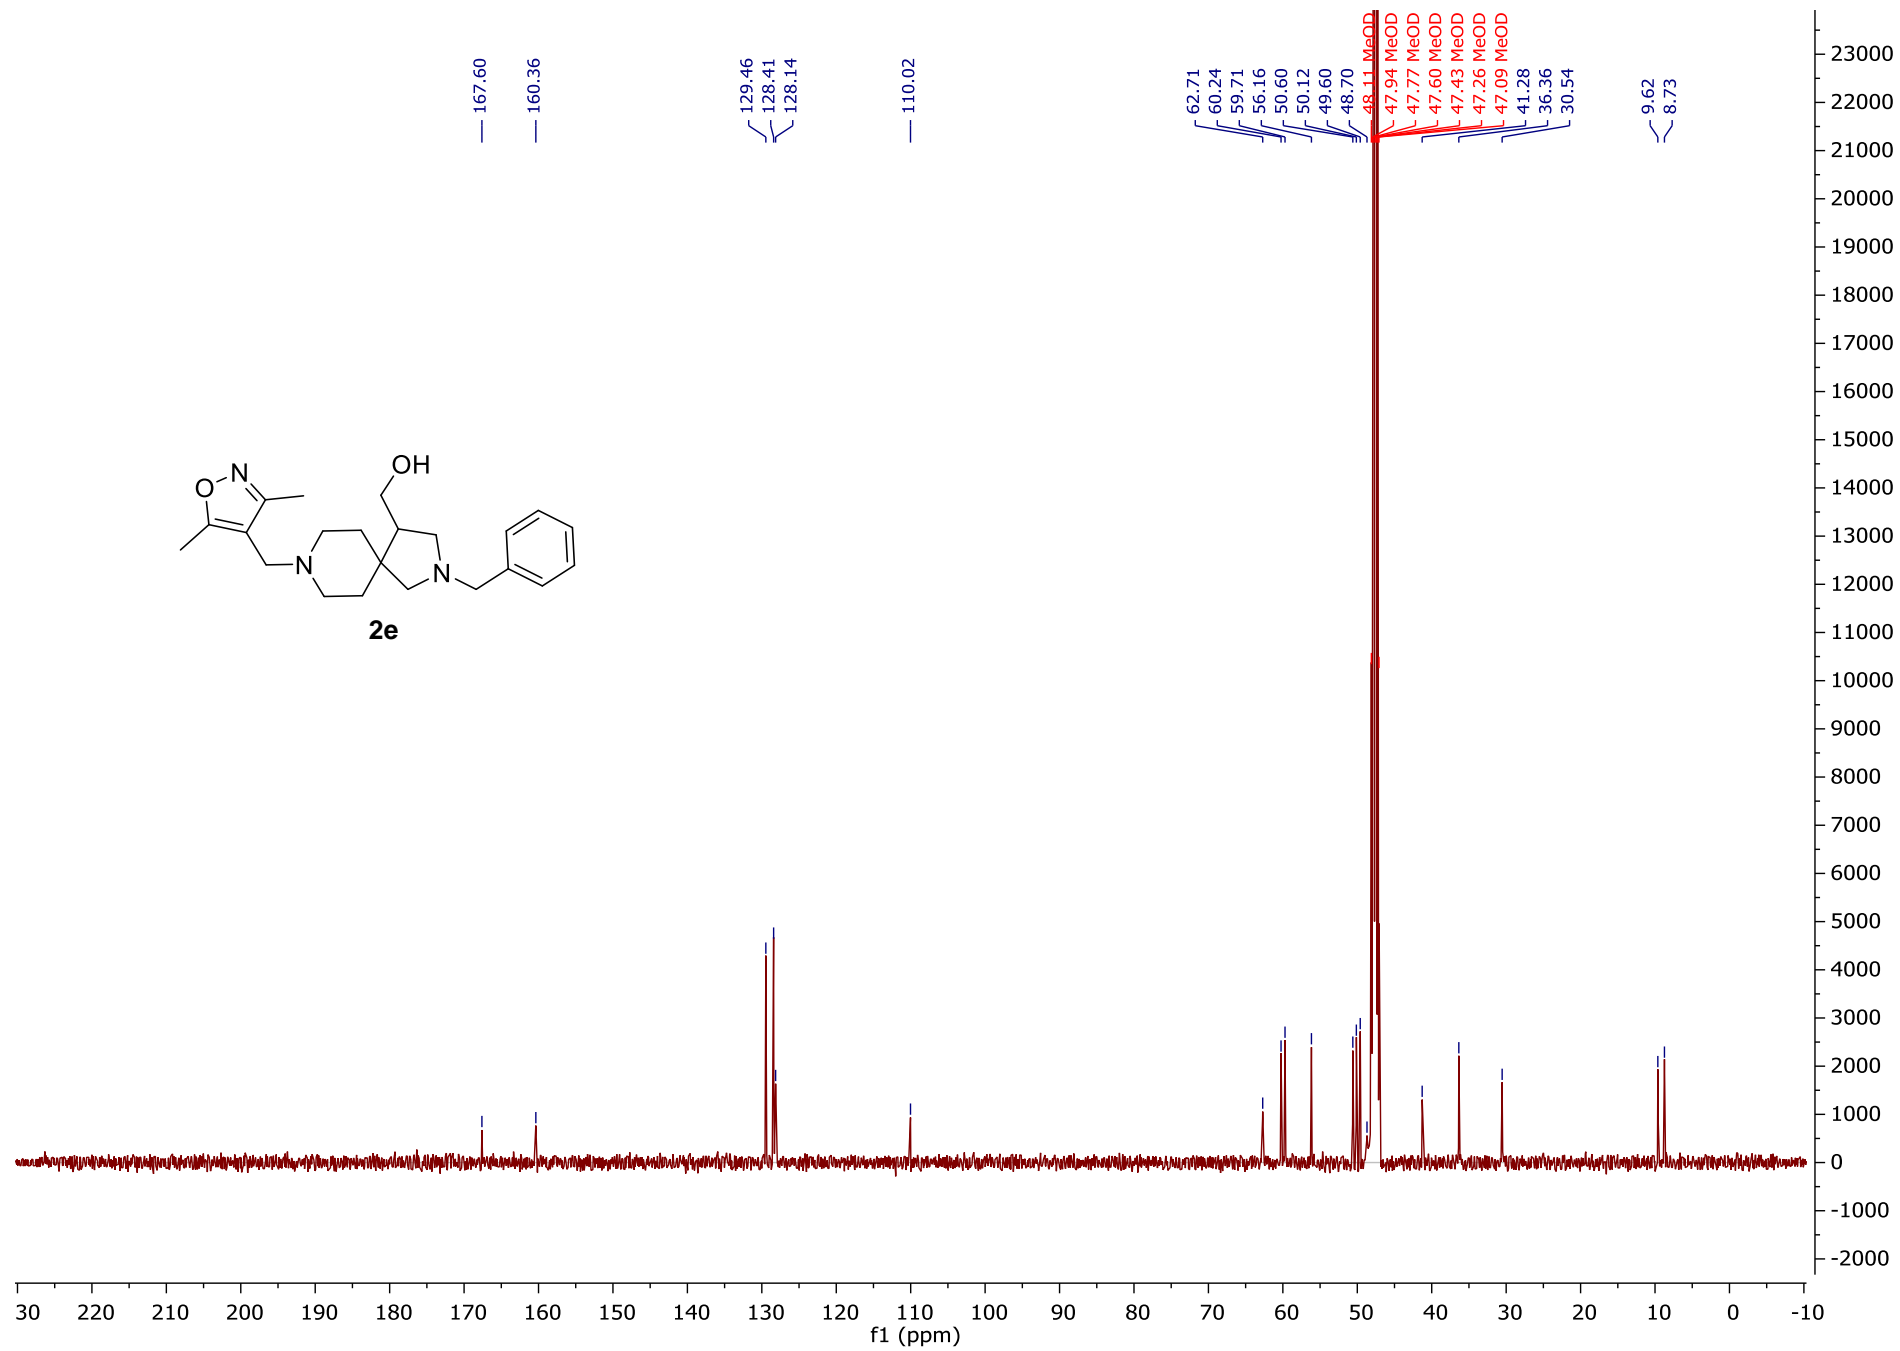

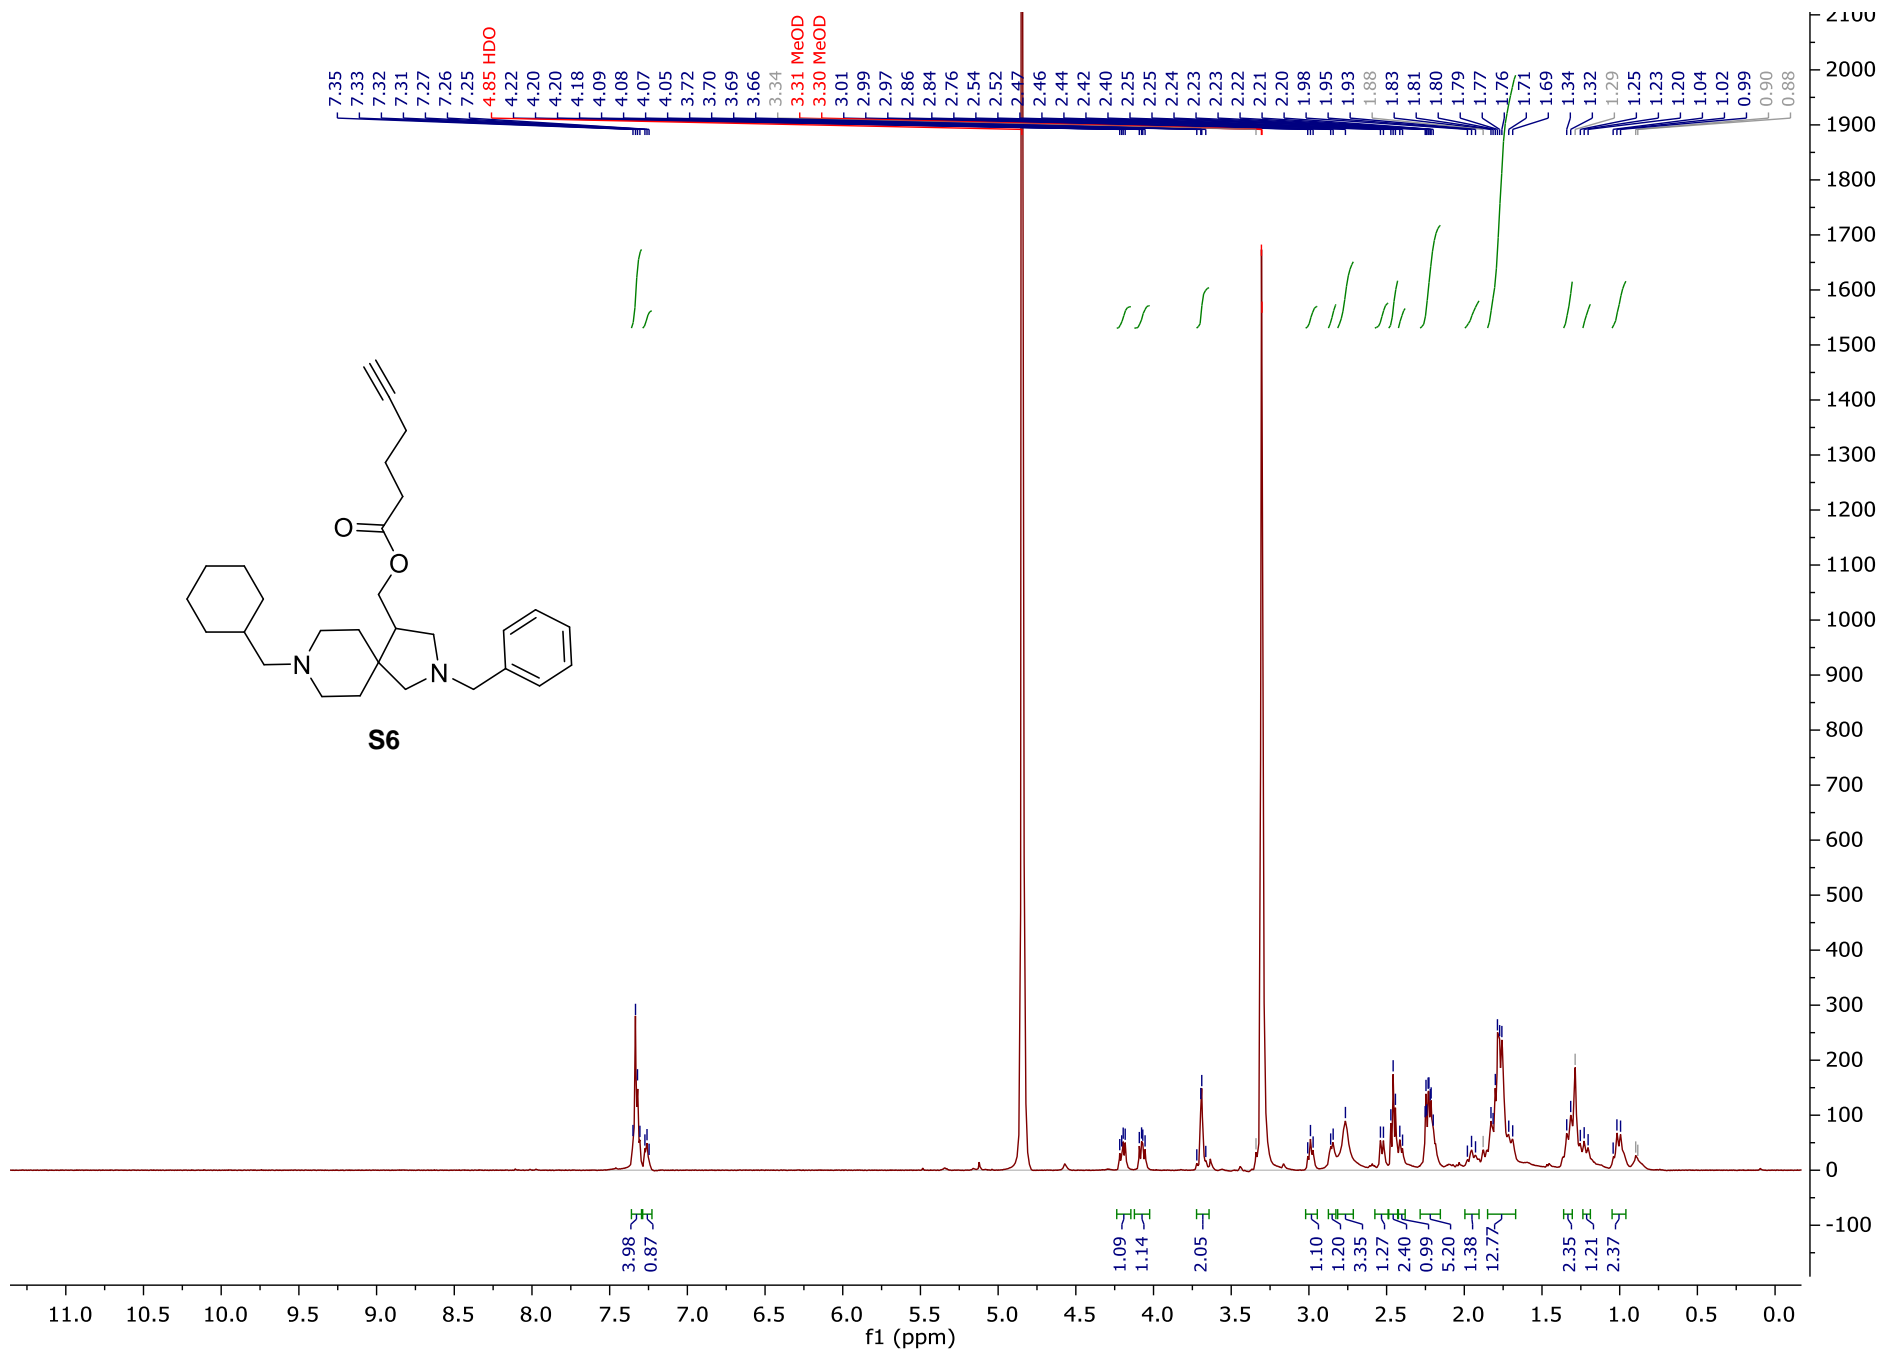

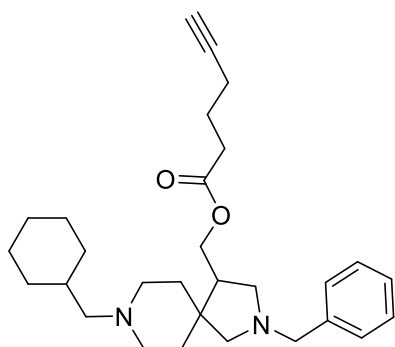

S6

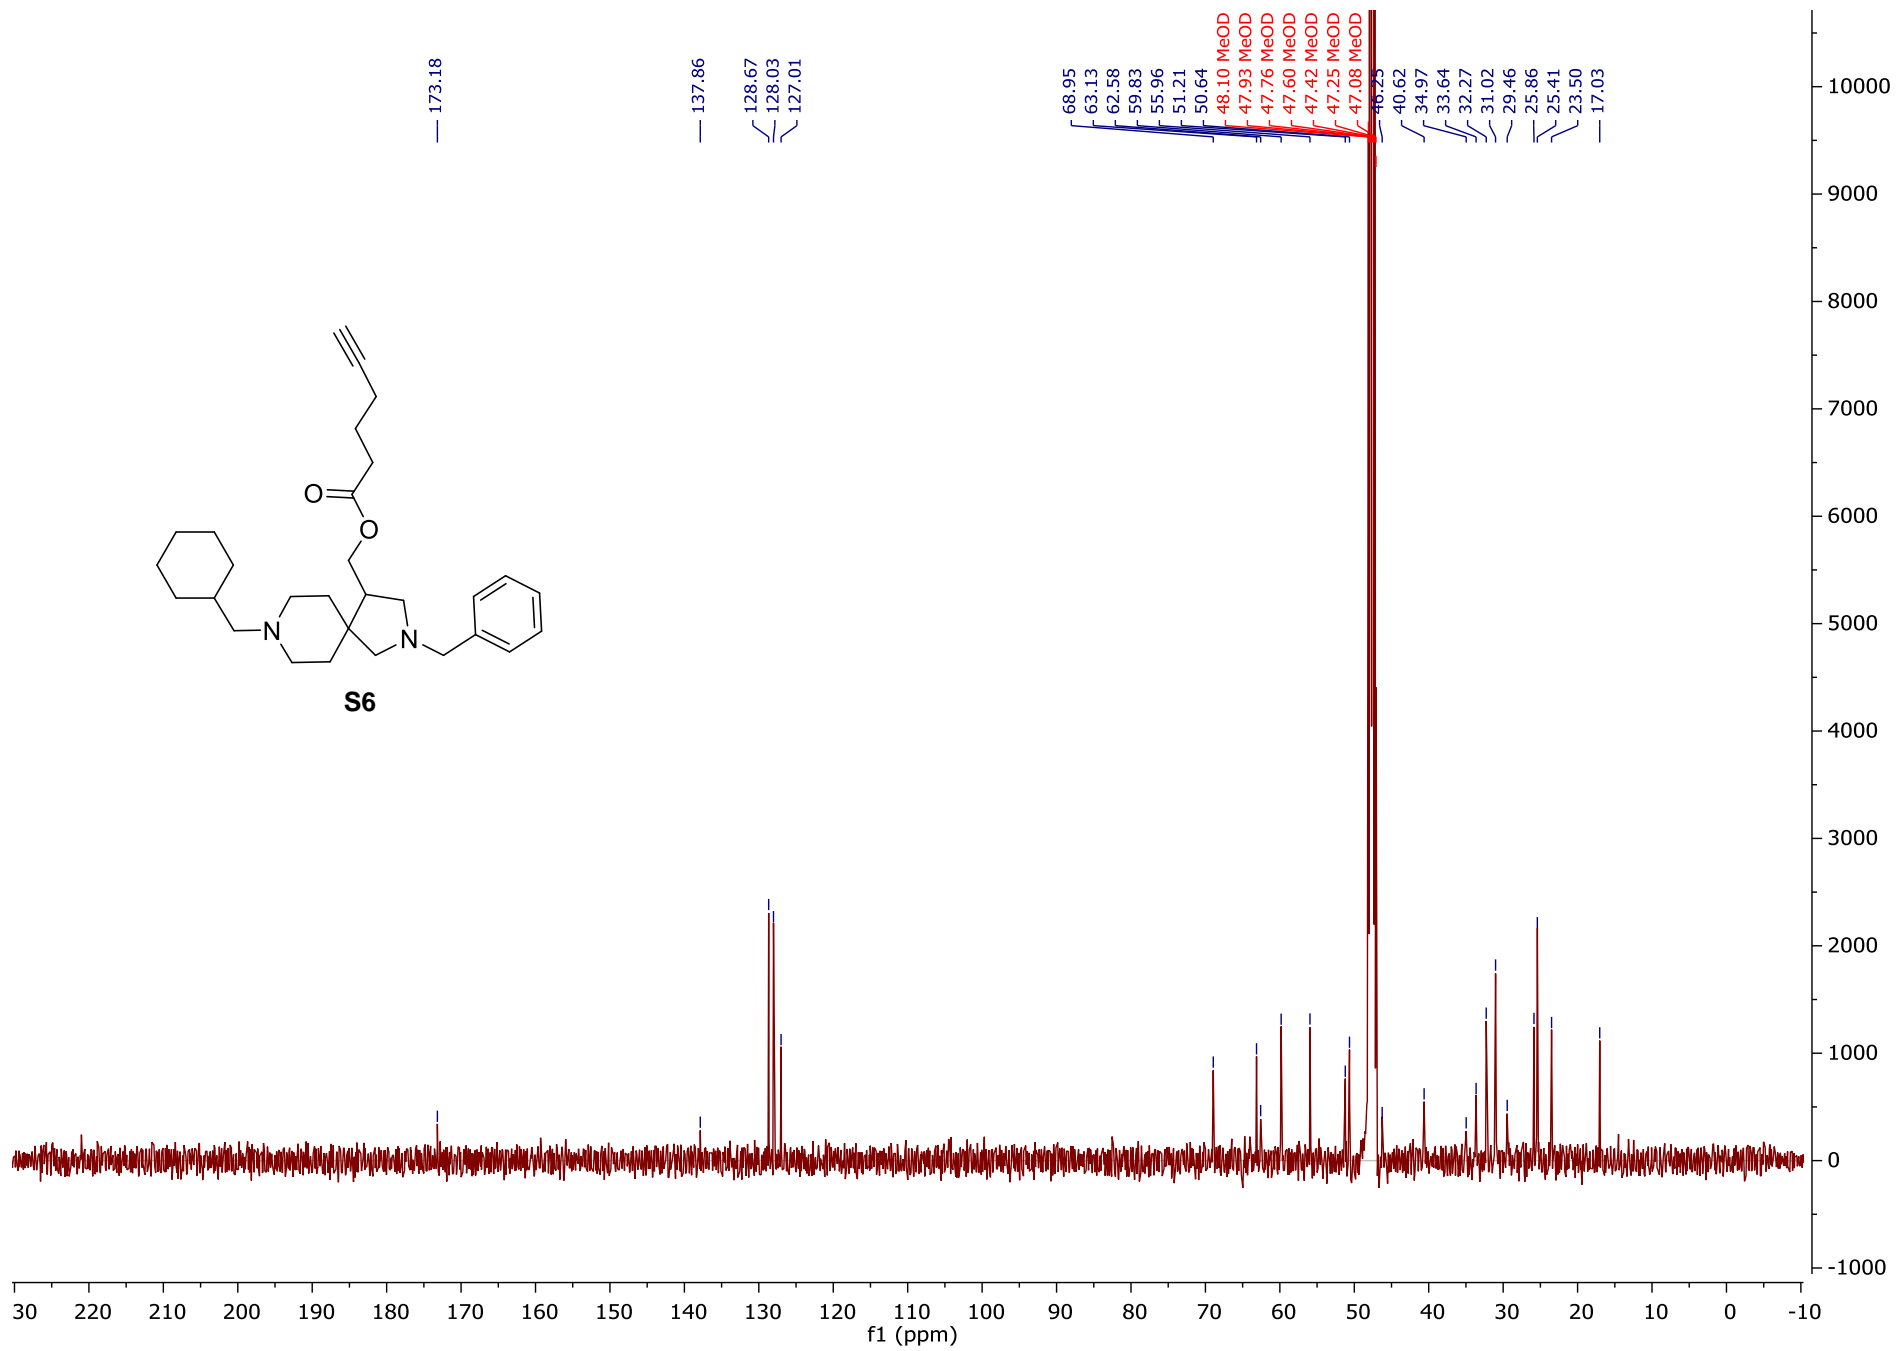

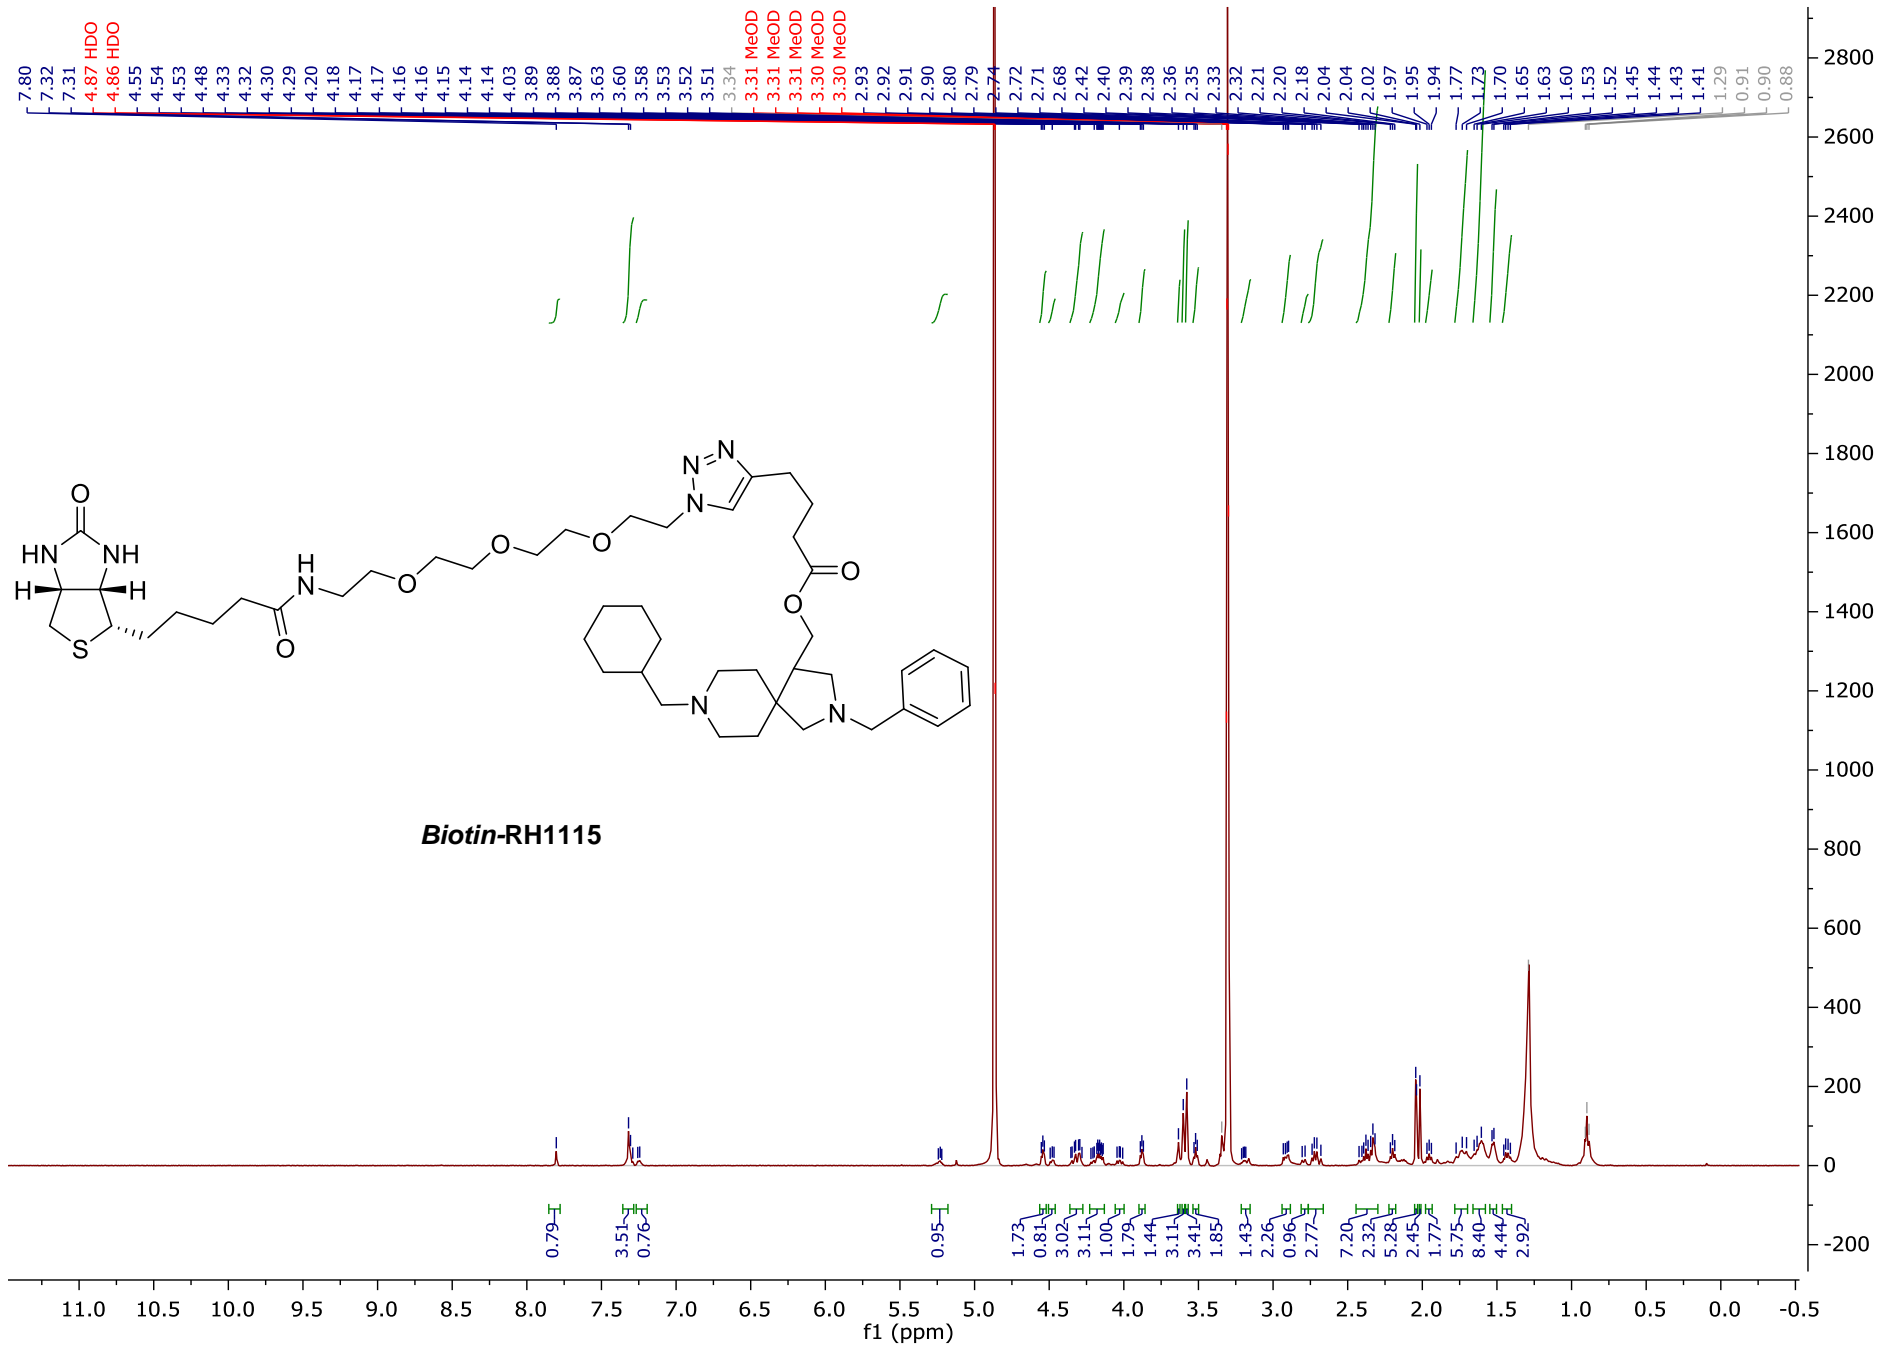

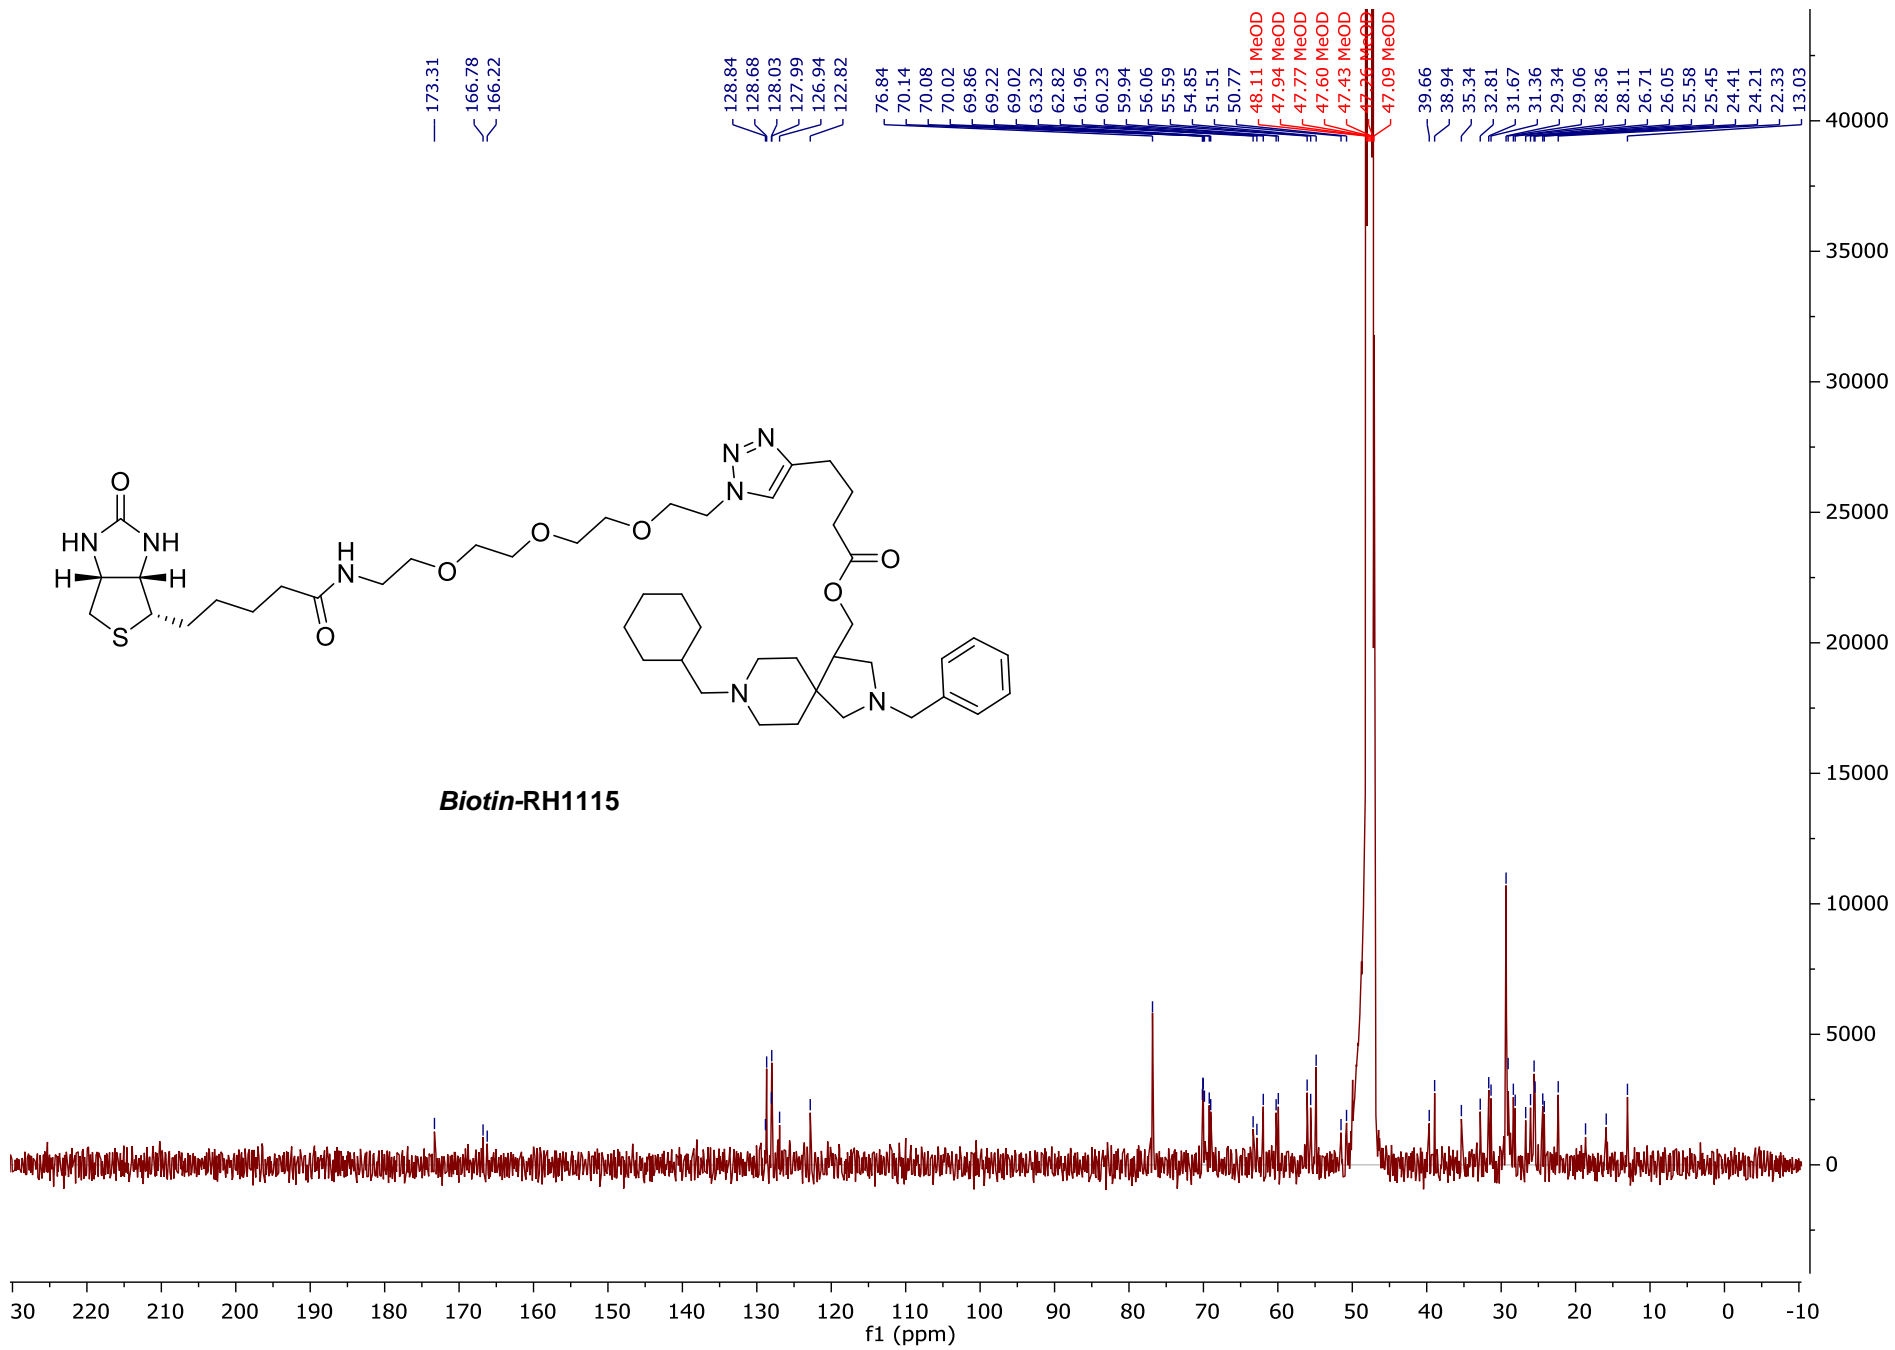

Supplement: cn3c00573_si_002.pdf [file cn3c00573_si_002.pdf]
